# Supplementary material for: Effect of mycophenolate mofetil on progression of interstitial fibrosis and tubular atrophy after kidney transplantation: a retrospective study
Source: PubMed Central journal article supplement — BMJ Open. 2014 Jul 3;4(7):e005005. doi: 10.1136/bmjopen-2014-005005 (PMC4091392; doi:10.1136/bmjopen-2014-005005), 2014-07-03
Supplement: bmjopen-2014-005005.draft_revisions.pdf [file bmjopen-2014-005005.draft_revisions.pdf]

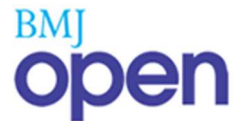

**Effect of Mycophenolate Mofetil on Progression of Interstitial Fibrosis and Tubular Atrophy after Kidney Transplantation**

|                                 |                                                                                                                                                                                                                                                                                                                                                                                                                                                                                                                                                                                                                                                                                                                                                                                                                              |
|---------------------------------|------------------------------------------------------------------------------------------------------------------------------------------------------------------------------------------------------------------------------------------------------------------------------------------------------------------------------------------------------------------------------------------------------------------------------------------------------------------------------------------------------------------------------------------------------------------------------------------------------------------------------------------------------------------------------------------------------------------------------------------------------------------------------------------------------------------------------|
| Journal:                        | <i>BMJ Open</i>                                                                                                                                                                                                                                                                                                                                                                                                                                                                                                                                                                                                                                                                                                                                                                                                              |
| Manuscript ID:                  | bmjopen-2014-005005                                                                                                                                                                                                                                                                                                                                                                                                                                                                                                                                                                                                                                                                                                                                                                                                          |
| Article Type:                   | Research                                                                                                                                                                                                                                                                                                                                                                                                                                                                                                                                                                                                                                                                                                                                                                                                                     |
| Date Submitted by the Author:   | 05-Feb-2014                                                                                                                                                                                                                                                                                                                                                                                                                                                                                                                                                                                                                                                                                                                                                                                                                  |
| Complete List of Authors:       | Mihovilovic, Karlo; University Hospital Merkur, Division of nephrology<br>Maksimovic, Bojana; University Hospital Merkur, Division of nephrology<br>Vojtušek, Ivana; University Hospital Merkur, Division of nephrology<br>Gracin, Sonja; University Hospital Merkur, Division of nephrology<br>Kocman, Branislav; University Hospital Merkur, Department of surgery<br>Gustin, Denis; University hospital Merkur, Department of anesthesiology<br>Vidas, Zeljko; University Hospital Merkur, Department of urology<br>Bulimbasic, Stela; University Hospital Dubrava, Department of pathology<br>Ljubanovic, Danica; University Hospital Dubrava, Department of pathology<br>Matovinovic, Mirjana; University Hospital Merkur, Division of nephrology<br>Knotek, Mladen; University Hospital Merkur, Division of nephrology |
| <b>Primary Subject Heading</b>: | Renal medicine                                                                                                                                                                                                                                                                                                                                                                                                                                                                                                                                                                                                                                                                                                                                                                                                               |
| Secondary Subject Heading:      | Pharmacology and therapeutics                                                                                                                                                                                                                                                                                                                                                                                                                                                                                                                                                                                                                                                                                                                                                                                                |
| Keywords:                       | Histopathology < PATHOLOGY, TRANSPLANT MEDICINE, Renal transplantation < NEPHROLOGY                                                                                                                                                                                                                                                                                                                                                                                                                                                                                                                                                                                                                                                                                                                                          |
|                                 |                                                                                                                                                                                                                                                                                                                                                                                                                                                                                                                                                                                                                                                                                                                                                                                                                              |

SCHOLARONE™  
Manuscripts

1  
2  
3 Effect of Mycophenolate Mofetil on Progression of Interstitial Fibrosis and Tubular  
4  
5  
6 Atrophy after Kidney Transplantation  
7  
8  
9

10 Karlo Mihovilović<sup>1</sup>, Bojana Maksimović<sup>1</sup>, Ivana Kovačević Vojtušek<sup>1</sup>, Sonja Gracin<sup>1</sup>,  
11  
12 Branislav Kocman<sup>2</sup>, Denis Guštin<sup>3</sup>, Željko Vidas<sup>4</sup>, Stela Bulimbašić<sup>6</sup>, Danica Galešić  
13  
14 Ljubanović<sup>5,6</sup>, Mirjana Sabljar Matovinović<sup>1</sup>, Mladen Knotek<sup>1,5</sup>  
15  
16  
17  
18  
19

20 Clinical Hospital Merkur: <sup>1</sup>Department of Medicine, Renal Division, <sup>2</sup>Department of Surgery,  
21  
22 <sup>3</sup>Department of Anaesthesiology, <sup>4</sup>Department of Urology; <sup>5</sup>University of Zagreb School of  
23  
24 Medicine, Zagreb, Croatia, Clinical Hospital Dubrava: <sup>6</sup>Department of Pathology  
25  
26  
27  
28  
29

30 **Keywords:** interstitial fibrosis, tubular atrophy, kidney function, myophenolate mofetil  
31

32 Word count: Abstract-200  
33

34 Manuscript- 2998  
35

36 **Number of tables:** 7  
37

38 **Number of figures:** 3  
39  
40

41 **Corresponding author:** Dr. Mladen Knotek  
42

43 Department of Medicine, Renal Division  
44

45 Clinical Hospital Merkur  
46

47 Zajceva 19  
48

49 10000 Zagreb  
50

51 Croatia  
52

53 e-mail: mladen.knotek1@zg.t-com.hr (this e-mail address can be published)  
54

55 phone: +38512431123, fax: +38512431123  
56  
57  
58  
59  
60

1  
2  
3 Karlo Mihovilović – participated in research design, collecting data, analyzing data and wrote the  
4 paper, karlomihovilovic@gmail.com  
5

6  
7 Bojana Maksimović - participated in collecting and analyzing data, bmaximovic@gmail.com  
8

9  
10 Ivana Kovačević Vojtušek - participated in collecting data, ikovacevicvojtusek@gmail.com  
11

12  
13 Sonja Gracin - participated in collecting data, sonja.gracin@gmail.com  
14

15  
16 Branislav Kocman - participated in collecting data, branislav.kocman@gmail.com  
17

18  
19 Denis Guštin - participated in collecting data, denis.gustin@zg.t-com.hr  
20

21  
22 Željko Vidas – participated in collecting data, zeljko.vidas1@zg.t-com.hr  
23

24  
25 Stela Bulimbašić - participated in collecting and analyzing data, stela.bulimbasic@gmail.com  
26

27  
28 Danica Galešić Ljubanović – participated in collecting and analyzing data,  
29 danica.ljubanovic@zg.htnet.hr  
30

31  
32 Mirjana Sabljar Matovinović – participated in collecting data, mirjana.sabljar-  
33 matovinovic@zg.t-com.hr  
34

35  
36 Mladen Knotek- proposed research design, analyzed data and participated in writing the paper,  
37 mladen.knotek1@zg.t-com.hr  
38

39  
40 Support and Financial Disclosure Declaration:

41  
42 Source of support: Grant by the Ministry of Science, Technology and Sports of the  
43 Republic of Croatia to Dr. Mladen Knotek.  
44

45  
46 Disclosures:

47  
48 The authors of this manuscript have no conflicts of interest to disclose.  
49  
50  
51  
52  
53  
54  
55  
56  
57  
58  
59  
60

1  
2  
3  
4  
5  
6 Abbreviations:  
7

8 IF/TA - interstitial fibrosis and tubular atrophy  
9

10 MMF - mycophenolate mofetil  
11

12 BK - polyoma virus BK  
13

14 CNI - calcineurin inhibitors  
15

16 DGF - delayed graft function  
17

18 eCrCl - estimated creatine clearance  
19

20 SPKT - simultaneous pancreas kidney transplantation  
21

22 HLA MM – human leukocyte antigen mismatch  
23  
24  
25  
26  
27  
28  
29  
30  
31  
32  
33  
34  
35  
36  
37  
38  
39  
40  
41  
42  
43  
44  
45  
46  
47  
48  
49  
50  
51  
52  
53  
54  
55  
56  
57  
58  
59  
60

## ABSTRACT:

**Aims** - Chronic transplant dysfunction after kidney transplantation is major reason of kidney graft loss and is caused by immunological and non-immunological factors. There is evidence that mycophenolate mofetil (MMF) may exert a positive effect on renal damage in addition to immunosuppression, by its direct antifibrotic properties. The aim of our study was to retrospectively investigate role of MMF dose on progression of chronic allograft dysfunction and IF/TA.

**Methods**-This is a retrospective cohort study that included 79 patients with kidney and kidney-pancreas transplantation. Immunosuppression consisted of anti-IL2 antibody induction, MMF, a calcineurin inhibitor  $\pm$  steroids. An association of average MMF dose over 1 year post transplant with progression of interstitial fibrosis ( $\Delta$ ci), tubular atrophy ( $\Delta$ ct) and estimated creatinine clearance (eCrcl) at 1 year post transplant was evaluated using univariate and multivariate analyses.

**Results** - Higher average MMF dose was significantly independently associated with better eCrcl at 1 year post transplant ( $b=0.21 \pm 0.1$ ,  $p=0.04$ ). In multiple regression analysis lower  $\Delta$ ci ( $b=-0.2 \pm 0.09$ ,  $p=0.05$ ) and  $\Delta$ ct ( $b=-0.29 \pm 0.1$ ,  $p=0.02$ ) were independently associated with greater average MMF dose. There was no correlation between average MMF dose and incidence of acute rejection ( $p=0.68$ ).

**Conclusions** - Higher average MMF dose over 1 year is associated with better renal function and slower progression of IF/TA, at least partly independent of its immunosuppressive effects.

### Strengths and limitations of this study

Important novel finding in our study is that greater average MMF exposure was strongly negatively correlated with IF/TA progression during first year after kidney transplantation. Patients on higher average dose of MMF (up to 4 g daily) during 1 year post transplantation had significantly lower progression of graft interstitial fibrosis and tubular atrophy. This is important finding, because of predictive value of graft IF/TA and should translate into better long-term graft survival. Our study has several shortcomings, such as its retrospective aspect and relatively short study period. As it was not aim of the study, we did not report side effects associated with different dosage of MMF.

## INTRODUCTION:

Kidney transplantation significantly improves patient survival and quality of life comparing to dialysis. While significant improvements have been made in the treatment of acute rejection and short survival of transplanted kidney, there has not been major improvement in the long-term survival of transplanted kidney.[1] Chronic transplant dysfunction after kidney transplantation is major cause of kidney graft loss and is evoked by immunological and non-immunological factors.[2, 3] Histology changes that determine chronic transplant dysfunction are interstitial fibrosis and tubular atrophy (IF/TA), arteriosclerosis, arteriolar hyalinosis, glomerulopathy and mesangial matrix expansion.[4] IF/TA is the major pathohistology finding that can be verified on graft biopsies after kidney transplantation and is a predictor of long-term allograft function.[4] Clinical factors that affect progression of IF/TA are: recipient age, HLA mismatch, episodes of severe acute rejection, chronic rejection (esp. antibody-mediated), use of calcineurin inhibitors and BK nephropathy. Avoidance of CNI toxicity is considered as an important step to slow progression of IF/TA.[4-7] Mycophenolate mofetil (MMF) may help lowering CNI toxicity, by allowing lower CNI exposure.[7] MMF reduces the risk of acute allograft rejection, without nephrotoxic side effects and is ideal candidate for long-term calcineurin drug reduction treatment strategies.[7] Retrospective studies of renal recipients who were treated with mycophenolate mofetil comparing azathioprin showed that MMF treated patients had significantly less chronic

1  
2  
3 allograft dysfunction.[8, 9] Besides being associated with lower acute rejection rates as  
4 compared to azathioprin,[10, 11] evidence from animal and human studies suggests that  
5  
6 MMF may also exert a direct antifibrotic properties due to its antiproliferative action on  
7  
8 nonimmune cells, including renal tubular cells and vascular smooth muscle cells.[12, 13]  
9  
10  
11  
12 The aim of our study was to investigate role of mycophenolate mofetil dose on  
13  
14 progression of IF/TA in kidney transplant recipients.  
15  
16  
17  
18  
19

## 20 PATIENTS AND METHODS:

### 21 *Patients:*

22  
23  
24  
25  
26  
27 This is a retrospective study conducted at Clinical Hospital “Mercur”. This study  
28  
29 represents a part of the posttransplant immune monitoring at the Mercur hospital,  
30  
31 approved by the Hospital Ethics Committee. The study included 79 patients with kidney  
32  
33 and kidney-pancreas transplantation, transplanted between 2003 and 2011. Eligible  
34  
35 patients had to have protocol kidney biopsy at the time of implantation and 12 months  
36  
37 after transplantation. Exclusion criteria have been: dual kidney transplantation, kidney-  
38  
39 liver transplantation, use of antithymocyte immunoglobulin, BK nephropathy and  
40  
41 recurrence of glomerulonephritis after transplantation.  
42  
43  
44  
45  
46  
47

### 48 *Immunosuppression:*

49  
50 Induction immunosuppression consisted of an anti-IL2 antibody (daclizumab or  
51  
52 basiliximab), calcineurin inhibitor (tacrolimus or cyclosporine), MMF and  
53  
54 methylprednisolone. Maintenance immunosuppression consisted of a calcineurin  
55  
56  
57  
58  
59  
60



1  
2  
3 inhibitor (tacrolimus or cyclosporine), MMF ± steroids. Target cyclosporine trough  
4 concentrations were 250-350 during first month posttransplant, 200-300 during second to  
5  
6  
7  
8 6<sup>th</sup> month and 100-150 µg/L thereafter. Target tacrolimus trough levels were 10-12  
9  
10 during first month, 8-10 during second to 6<sup>th</sup> month and 5-8 µg/L thereafter.

11  
12 Mycophenolic acid target trough concentration was aimed to be higher than 7.2 µmol/L  
13 with tacrolimus and higher than 5 µmol/L with cyclosporine use.

14  
15  
16  
17 Daclizumab was administered at day 0: 2mg/kg i.v. before opening of vascular  
18 anastomosis and at day 14: 2mg/kg i.v.. Basiliximab was administered at day 0: 20 mg  
19  
20  
21  
22 i.v. before opening of vascular anastomosis and at day 4: 20 mg i.v..  
23

24  
25 Steroids have been dosed as follows: day 0: intraoperatively 500 mg of  
26  
27 methylprednisolone, day 1: 250 mg, day 2: 125mg, day 3: 80 mg and day 4: 40 mg. In  
28  
29 patients with early steroid withdrawal steroids have been withdrawn at day 5 after  
30  
31 transplantation. In patients maintained on steroids, nadir dose of prednisone was 5 mg/d,  
32  
33 achieved by 6 months. The criteria for early elimination of steroids were low  
34  
35 immunological risk of the recipient (absence of, or low degree of HLA sensitization,  
36  
37 i.e. PRA <10%) and good immediate renal function, as well as absence of an episode of  
38  
39 acute rejection within 5 days after the transplantation. Steroids have been reintroduced in  
40  
41 patients who suffered acute rejection episode.  
42  
43

44  
45 As prophylaxis for viral (HSV, CMV), fungal (Candida spp.) urinary and P. jiroveci  
46  
47 infections, low-dose fluconazole (for one year), valganciclovir (universally for three  
48  
49 months) and sulfomethoxazol and trimethoprim (for one year) was used.  
50  
51  
52  
53  
54  
55  
56  
57  
58  
59  
60

1  
2  
3  
4  
5  
6  
7  
8 *Renal allograft biopsies:*

9  
10 Protocol kidney biopsies were done at implantation, 1, 3, 6 and 12 months after  
11 transplantation. For cause biopsies were done in case of unexplained deterioration of  
12 renal function, or once weekly in patients with DGF. All rejection episodes were  
13 histologically confirmed. Histopathological analysis was performed by either of two  
14 pathologists who were blinded for immunosuppression. Acute rejections and chronic  
15 allograft scores have been analyzed using Banff 97 classification and its updates.[14, 15]  
16  
17 All protocol and indication biopsies were analyzed by light microscopy, by  
18 immunofluorescence for C4d, and if indicated by immunohistochemistry for BK virus.  
19 Biopsies at 1 year post transplant have been also analyzed by electron microscopy for  
20 signs of chronic antibody-mediated rejection (transplant glomerulopathy, peritubular  
21 capillary basement membrane multilayering).[16]  
22  
23  
24  
25  
26  
27  
28  
29  
30  
31  
32  
33  
34  
35  
36  
37  
38

39 *Clinical outcome parameters:*

40  
41 Progression of chronic allograft scores during 1 year posttransplant was calculated by  
42 subtracting implantation chronic scores from chronic allograft scores 12 months  
43 posttransplant: interstitial fibrosis ( $\Delta c_i$ ), tubular atrophy ( $\Delta c_t$ ), glomerulosclerosis ( $\Delta c_g$ ),  
44 mesangial matrix increase ( $\Delta m_m$ ), vasculopathy ( $\Delta c_v$ ) and arteriolar hyalinosis ( $\Delta a_h$ ).  
45  
46  
47  
48  
49  
50  
51  
52  
53  
54  
55  
56  
57  
58  
59  
60  
61  
62  
63  
64  
65  
66  
67  
68  
69  
70  
71  
72  
73  
74  
75  
76  
77  
78  
79  
80  
81  
82  
83  
84  
85  
86  
87  
88  
89  
90  
91  
92  
93  
94  
95  
96  
97  
98  
99  
100  
101  
102  
103  
104  
105  
106  
107  
108  
109  
110  
111  
112  
113  
114  
115  
116  
117  
118  
119  
120  
121  
122  
123  
124  
125  
126  
127  
128  
129  
130  
131  
132  
133  
134  
135  
136  
137  
138  
139  
140  
141  
142  
143  
144  
145  
146  
147  
148  
149  
150  
151  
152  
153  
154  
155  
156  
157  
158  
159  
160  
161  
162  
163  
164  
165  
166  
167  
168  
169  
170  
171  
172  
173  
174  
175  
176  
177  
178  
179  
180  
181  
182  
183  
184  
185  
186  
187  
188  
189  
190  
191  
192  
193  
194  
195  
196  
197  
198  
199  
200  
201  
202  
203  
204  
205  
206  
207  
208  
209  
210  
211  
212  
213  
214  
215  
216  
217  
218  
219  
220  
221  
222  
223  
224  
225  
226  
227  
228  
229  
230  
231  
232  
233  
234  
235  
236  
237  
238  
239  
240  
241  
242  
243  
244  
245  
246  
247  
248  
249  
250  
251  
252  
253  
254  
255  
256  
257  
258  
259  
260  
261  
262  
263  
264  
265  
266  
267  
268  
269  
270  
271  
272  
273  
274  
275  
276  
277  
278  
279  
280  
281  
282  
283  
284  
285  
286  
287  
288  
289  
290  
291  
292  
293  
294  
295  
296  
297  
298  
299  
300  
301  
302  
303  
304  
305  
306  
307  
308  
309  
310  
311  
312  
313  
314  
315  
316  
317  
318  
319  
320  
321  
322  
323  
324  
325  
326  
327  
328  
329  
330  
331  
332  
333  
334  
335  
336  
337  
338  
339  
340  
341  
342  
343  
344  
345  
346  
347  
348  
349  
350  
351  
352  
353  
354  
355  
356  
357  
358  
359  
360  
361  
362  
363  
364  
365  
366  
367  
368  
369  
370  
371  
372  
373  
374  
375  
376  
377  
378  
379  
380  
381  
382  
383  
384  
385  
386  
387  
388  
389  
390  
391  
392  
393  
394  
395  
396  
397  
398  
399  
400  
401  
402  
403  
404  
405  
406  
407  
408  
409  
410  
411  
412  
413  
414  
415  
416  
417  
418  
419  
420  
421  
422  
423  
424  
425  
426  
427  
428  
429  
430  
431  
432  
433  
434  
435  
436  
437  
438  
439  
440  
441  
442  
443  
444  
445  
446  
447  
448  
449  
450  
451  
452  
453  
454  
455  
456  
457  
458  
459  
460  
461  
462  
463  
464  
465  
466  
467  
468  
469  
470  
471  
472  
473  
474  
475  
476  
477  
478  
479  
480  
481  
482  
483  
484  
485  
486  
487  
488  
489  
490  
491  
492  
493  
494  
495  
496  
497  
498  
499  
500  
501  
502  
503  
504  
505  
506  
507  
508  
509  
510  
511  
512  
513  
514  
515  
516  
517  
518  
519  
520  
521  
522  
523  
524  
525  
526  
527  
528  
529  
530  
531  
532  
533  
534  
535  
536  
537  
538  
539  
540  
541  
542  
543  
544  
545  
546  
547  
548  
549  
550  
551  
552  
553  
554  
555  
556  
557  
558  
559  
560  
561  
562  
563  
564  
565  
566  
567  
568  
569  
570  
571  
572  
573  
574  
575  
576  
577  
578  
579  
580  
581  
582  
583  
584  
585  
586  
587  
588  
589  
590  
591  
592  
593  
594  
595  
596  
597  
598  
599  
600  
601  
602  
603  
604  
605  
606  
607  
608  
609  
610  
611  
612  
613  
614  
615  
616  
617  
618  
619  
620  
621  
622  
623  
624  
625  
626  
627  
628  
629  
630  
631  
632  
633  
634  
635  
636  
637  
638  
639  
640  
641  
642  
643  
644  
645  
646  
647  
648  
649  
650  
651  
652  
653  
654  
655  
656  
657  
658  
659  
660  
661  
662  
663  
664  
665  
666  
667  
668  
669  
670  
671  
672  
673  
674  
675  
676  
677  
678  
679  
680  
681  
682  
683  
684  
685  
686  
687  
688  
689  
690  
691  
692  
693  
694  
695  
696  
697  
698  
699  
700  
701  
702  
703  
704  
705  
706  
707  
708  
709  
710  
711  
712  
713  
714  
715  
716  
717  
718  
719  
720  
721  
722  
723  
724  
725  
726  
727  
728  
729  
730  
731  
732  
733  
734  
735  
736  
737  
738  
739  
740  
741  
742  
743  
744  
745  
746  
747  
748  
749  
750  
751  
752  
753  
754  
755  
756  
757  
758  
759  
760  
761  
762  
763  
764  
765  
766  
767  
768  
769  
770  
771  
772  
773  
774  
775  
776  
777  
778  
779  
780  
781  
782  
783  
784  
785  
786  
787  
788  
789  
790  
791  
792  
793  
794  
795  
796  
797  
798  
799  
800  
801  
802  
803  
804  
805  
806  
807  
808  
809  
810  
811  
812  
813  
814  
815  
816  
817  
818  
819  
820  
821  
822  
823  
824  
825  
826  
827  
828  
829  
830  
831  
832  
833  
834  
835  
836  
837  
838  
839  
840  
841  
842  
843  
844  
845  
846  
847  
848  
849  
850  
851  
852  
853  
854  
855  
856  
857  
858  
859  
860  
861  
862  
863  
864  
865  
866  
867  
868  
869  
870  
871  
872  
873  
874  
875  
876  
877  
878  
879  
880  
881  
882  
883  
884  
885  
886  
887  
888  
889  
890  
891  
892  
893  
894  
895  
896  
897  
898  
899  
900  
901  
902  
903  
904  
905  
906  
907  
908  
909  
910  
911  
912  
913  
914  
915  
916  
917  
918  
919  
920  
921  
922  
923  
924  
925  
926  
927  
928  
929  
930  
931  
932  
933  
934  
935  
936  
937  
938  
939  
940  
941  
942  
943  
944  
945  
946  
947  
948  
949  
950  
951  
952  
953  
954  
955  
956  
957  
958  
959  
960  
961  
962  
963  
964  
965  
966  
967  
968  
969  
970  
971  
972  
973  
974  
975  
976  
977  
978  
979  
980  
981  
982  
983  
984  
985  
986  
987  
988  
989  
990  
991  
992  
993  
994  
995  
996  
997  
998  
999  
1000

1  
2  
3 greater, patients have been treated with antithymocyte globulin. Antibody-mediated  
4  
5  
6 rejections were treated with steroid pulse and plasmapheresis.

7  
8 Average dose of MMF during 1 year posttransplant was calculated from MMF dose at  
9  
10 month 1, 3, 6 and 12.

11  
12  
13  
14  
15 *Statistical analysis:*

16  
17 Numerical data are presented as mean  $\pm$  SD or median with range in case of not normal  
18  
19 distribution. Normality of distribution has been tested with Kolmogorov-Smirnov test.  
20  
21 Correlation between two continuous variables has been tested using Spearman  
22  
23 nonparametric correlation. Difference between two groups in continuous variables has  
24  
25 been tested with student t-test or with Mann–Whitney test in non-normally distributed  
26  
27 variables. The significance of the progression in chronic scores was analyzed using  
28  
29 Wilcoxon Matched Pairs test. Univariate and multiple linear regression analysis were  
30  
31 performed to determine predictive factors for progression of chronic allograft scores and  
32  
33 kidney function at 12 months after transplantation. All variables that were associated with  
34  
35 respective outcome in bivariate analysis (at  $p \leq 0.1$ ) were included in multivariate  
36  
37 analysis. Because of colinearity between ci and ct score, only one score was included in  
38  
39 each multivariate analysis. Statistical significance was considered at  $p < 0.05$ . All  
40  
41  
42  
43  
44  
45  
46 statistical analyses were performed using Statistica 10 (StatSoft, Tulsa, OK, USA).  
47  
48  
49  
50  
51  
52  
53  
54

55 RESULTS:  
56  
57  
58  
59  
60

1  
2  
3  
4  
5  
6 *Patient and transplant characteristics:*  
7

8 Patient characteristics are shown in Table 1. Recipients were a mean of  $44.67 \pm 12.03$   
9 years old at the time of transplantation, 68 percent of them were male and all were  
10 Caucasians. 33 percent of recipients had DGF after transplantation. Donors were a mean  
11 of  $43.89 \pm 15.55$  years old and 54 percent of them were male. Number of living donor  
12 transplantations was 24 (30 percent). Average daily MMF dose during 1 year  
13 posttransplant was  $2244 \pm 585$  mg (1062 – 4000) (Table 5). As expected, there was no  
14 correlation of MMF dose with MMF trough concentration ( $R=-0.13$ ;  $p=0.28$ ). Also, there  
15 was no correlation between MMF dose with tacrolimus concentration ( $R=-0.04$ ;  $p=0.79$ ).  
16  
17 Early steroid withdrawal was done in 46 percent of patients after transplantation.  
18  
19 Incidence of subclinical and clinical acute rejections greater than borderline was 30  
20 percent in first year. There was no correlation between average MMF dose and incidence  
21 of acute rejection ( $p=0.68$ ).  
22  
23  
24  
25  
26  
27  
28  
29  
30  
31  
32  
33  
34  
35  
36  
37  
38

39 *Factors associating with eCr<sub>cl</sub>:*  
40

41 Kidney function increased during 1st year post transplant. eCr<sub>cl</sub> at month 3 was  $56.98 \pm$   
42  $15.78$  ml/min, at 6 month  $58.94 \pm 16.94$  ml/min and at 12 month  $61.47 \pm 16.75$  ml/min  
43 ( $p<0.001$ ; 12 months vs. 3 months) (Figure 1.) eCr<sub>cl</sub> at 1 year post transplant was greater  
44 in SPKT recipients ( $71.38 \pm 13.45$  ml/min vs.  $57.88 \pm 16.47$  ml/min;  $p=0.001$ ) and in  
45 patients who did not have DGF ( $64.08 \pm 15.87$  ml/min vs.  $56.15 \pm 17.55$  ml/min;  $p=0.05$ ).  
46  
47 Donor age ( $R=-0.46$ ;  $p<0.001$ ) and recipient age ( $R=-0.46$ ;  $p<0.001$ ) negatively  
48 correlated with eCr<sub>cl</sub> at 1 year post transplant, while there was no correlation of renal  
49  
50  
51  
52  
53  
54  
55  
56  
57  
58  
59  
60

1  
2  
3 function with donor and recipient gender, type of donation (deceased *vs.* living), HLA  
4 MM, average CNI concentration, steroid-free regimen of immunosuppression, or history  
5  
6 MM, average CNI concentration, steroid-free regimen of immunosuppression, or history  
7  
8 of acute rejection (Table 6). In univariate analysis allograft function at 12 month post Tx  
9  
10 was also negatively correlated with ci (R=-0.34; p=0.002) and ct (R=-0.35; p=0.002) at  
11  
12 12 month (Figure 2A, Figure 2B). Although MMF dose was positively correlated with  
13  
14 renal function with borderline significance in univariate analysis, in multivariate analysis  
15  
16 there was a significant positive association between greater average MMF dose and better  
17  
18 eCr<sub>cl</sub> at 12 month post transplant (b=0.21 ± 0.1; p=0.04) (Table 2.).  
19  
20  
21  
22  
23

24  
25 *Factors affecting IF/TA:*  
26

27 The average ci score increased from 0.16 ± 0.44 to 0.94 ± 0.86 between implantation and  
28  
29 month 12 (p<0.001). Average progression of this and other chronic scores during 1 year  
30  
31 post transplant is shown in suppl. data (Table 7). In univariate analysis Δci (R=-0.37;  
32  
33 p=0.001) and Δct (R=-0.38; p=0.001) significantly negatively correlated with average  
34  
35 MMF dose (Figure 3A and 3B, Table 3). There was lower progression of ci score in  
36  
37 patients on steroid-free immunosuppression (0.47 ± 0.7 *vs.* 1.09 ± 0.87; p=0.002) and in  
38  
39 those who did not have DGF (0.62 ± 0.74 *vs.* 1.19 ± 0.98; p=0.02). Acute cellular  
40  
41 rejection, recipient and donor gender, recipient and donor age, HLA MM, deceased *vs.*  
42  
43 living donor, as well as average concentration of tacrolimus had no significant effect on  
44  
45 progression of chronic allograft scores. Factors that remained significantly associated  
46  
47 with progression of ci score in multivariate analysis were ci0 score, donor age, average  
48  
49 MMF dose, DGF and steroid-free immunosuppression (Table 4.). In multivariate analysis  
50  
51  
52  
53  
54  
55  
56  
57  
58  
59  
60

1  
2  
3 only ct0 score, average MMF dose and DGF remained independently associated with 12-  
4  
5 month progression of ct score (Table 4).  
6  
7  
8  
9

10 Discussion:

11  
12  
13  
14  
15 The most important novel finding in our study is that greater average MMF exposure was  
16  
17 strongly negatively correlated with IF/TA progression during first year after kidney  
18  
19 transplantation. Patients on higher average dose of MMF during 1 year post  
20  
21 transplantation had significantly lower progression of ci and ct scores. To our knowledge  
22  
23 this is first study demonstrating that there is a dose-dependent protective effect of MMF  
24  
25 on graft IF/TA. Lower progression of IF/TA could not be explained with lower  
26  
27 concentration of CNI, because there was not correlation between tacrolimus  
28  
29 concentration with IF/TA. Similarly, there was no correlation between average MMF  
30  
31 dose and tacrolimus ( $R=-0.04$ ;  $p=0.79$ ) or cyclosporine concentration ( $R=-0.07$ ,  $p=0.79$ ).  
32  
33 In addition, higher average MMF dose was not associated with decreased incidence of  
34  
35 biopsy proven acute rejection, which suggests that antifibrotic properties of higher MMF  
36  
37 dose was at least partly independent of its immunosuppressive effects. Higher MMF dose  
38  
39 had only moderate effect on 1-year renal function, which is consistent with previous  
40  
41 reports showing that transplanted kidneys undergo pathohistology changes without  
42  
43 significant early change in kidney function.[17]  
44  
45  
46  
47  
48  
49

50 In the present retrospective study we have confirmed that IF/TA progression occurs in  
51  
52 first year after kidney transplantation. Several studies have shown that progression of  
53  
54 IF/TA is correlated with type of immunosuppression.[18] In most transplant centers in  
55  
56  
57  
58  
59  
60

1  
2  
3 the United States and Europe immunosuppression consists of induction with an anti-IL2R  
4 antibody or antithymocyte immunoglobulin and maintenance with a calcineurin inhibitor,  
5 MMF and steroids.[19] Studies have reported significant improvement in kidney function  
6 in patients on MMF with lower exposition to CNIs, esp. tacrolimus.[20] Recently, in the  
7 paper of Kamar *et al.* it has been reported that maintenance kidney transplant patients  
8 converted to a higher dose of the mycophenolate sodium (1440 mg daily) with lower  
9 tacrolimus concentration had borderline higher eCr<sub>cl</sub> on month 6 vs. those treated with  
10 lower dose of mycophenolate sodium, with usual tacrolimus concentration (eCr<sub>cl</sub> 49.1 ±  
11 11.1 vs. 44.7 ± 11.5 ml/min; p=0.07).[21] Although there was only borderline  
12 significance, increased mycophenolate dosing with lower tacrolimus concentration was  
13 safe with potential benefit on kidney function.  
14  
15  
16  
17  
18  
19  
20  
21  
22  
23  
24  
25  
26  
27  
28

29 Our study also corroborates recently published findings of a *post hoc* joint analysis of the  
30 Symphony, FDCC and OptiCept trials, where a lower tacrolimus level and a higher  
31 MMF dose were associated with significantly better kidney function at 1 year post  
32 transplant.[22] Shortcoming of these studies[17,18] is lack of protocol biopsies. The  
33 optimal MMF dosing in patients maintained on contemporary low-dose CNI is still  
34 undetermined. However, some results of early MMF registration trials suggest that higher  
35 MMF exposure might be beneficial; having in mind that there was no antibody induction  
36 in these studies and that CNI was standard dose cyclosporine. Thus, in the Tri-continental  
37 study, group treated with 3 g MMF compared with 2 g of MMF showed lower incidence  
38 of biopsy proven acute rejection episodes (15.9% vs. 19.7%) within 6 month period  
39 selected for the primary efficacy analysis. Similarly, serum creatinine level at 1 year was  
40 1.42 ± 0.07 mg/dL in the MMF 3 g group vs. 1.64 ± 0.07 mg/dL in MMF 2 g group.[12]  
41  
42  
43  
44  
45  
46  
47  
48  
49  
50  
51  
52  
53  
54  
55  
56  
57  
58  
59  
60

1  
2  
3 In the European mycophenolate mofetil study same trends regarding higher MMF dose  
4 were observed.[11] As mentioned before, in these studies there was no antibody  
5  
6 induction that could have allowed lower dose of cyclosporin with higher dose of MMF  
7  
8 and there were no protocol biopsies. In a more recent MYSS trial, there was no difference  
9  
10 in acute rejection rate and renal function between MMF and azathioprine in a  
11  
12 cyclosporine-based protocol.[19] However in that study only one MMF dose was  
13  
14 compared to azathioprine[23] and again there were no protocol biopsies.  
15  
16  
17

18  
19 Unfortunately adequate prospective MMF dose comparison studies in tacrolimus-based  
20  
21 protocols with antibody induction are missing. In the Symphony study it was reported  
22  
23 that patients on tacrolimus-MMF-prednisone maintenance immunosuppression after kidney  
24  
25 transplantation had better kidney function and graft survival with lower number of acute  
26  
27 rejection episodes. Patients in that group had highest MMF exposure.[24] Protocols with  
28  
29 even higher MMF exposure might allow additional CNI sparing, that would decrease side  
30  
31 effect of CNI (hypertension, diabetes, hyperlipidemia, neurotoxicity).[25]  
32  
33  
34

35  
36 Clinical relevance of IF/TA without other concomitant pathology (i.e. recurrent disease  
37  
38 and chronic antibody-mediated rejection) for prediction of graft deterioration and loss is  
39  
40 controversial. In El-Zoghby et al. study there was attempt to identify specific causes of  
41  
42 late kidney allograft failure. The authors found that transplant glomerulopathy was  
43  
44 responsible for 37 percent loss of functioning grafts, while graft loss due to IF/TA was  
45  
46 present in 31 percent of cases (with higher frequency in deceased-donor transplants).[26]  
47  
48  
49

50  
51 At first glance, these results seem at odd with ours, where there were no signs of chronic  
52  
53 antibody-mediated rejection. An explanation for this discrepancy in the results of the two  
54  
55 studies is not completely clear, but the former study included high number of living  
56  
57  
58  
59  
60



1  
2  
3 transplants (72.5 percent) with glomerulonephritis as primary disease and with follow-up  
4  
5 up to 10 years. Transplant glomerulopathy is more frequently seen late posttransplant,  
6  
7 generally with low incidence. Nevertheless, ours and El-Zoghby study, both  
8  
9 demonstrated that IF/TA even in absence of other pathology is associated with adverse  
10  
11 graft outcome. Another important study, the DeKaf study, tried to use various  
12  
13 histopathologic clusters to differentiate subgroups within diagnosis of IF/TA. They found  
14  
15 that cluster with more severe fibrosis plus inflammation and arterial lesions had the worst  
16  
17 prognosis.[27] Although incidence of acute rejection in our study did not vary with MMF  
18  
19 exposure, increased MMF exposure might suppress mild graft inflammation, below the  
20  
21 threshold for diagnosing acute rejection. This is subject of our ongoing investigation and  
22  
23 will be reported separately. An interesting finding of the present study was that early  
24  
25 steroid withdrawal was not associated with worse IF/TA. At first glance this is at odd  
26  
27 with the Astellas trial.[23] However, according to our protocol, patients with DGF were  
28  
29 not included in early steroid withdrawal and Astellas trial, which did not have protocol  
30  
31 biopsies, reported increased IF/TA in early steroid withdrawal group based on indication  
32  
33 biopsies performed early posttransplant, thus more likely reflecting donor-derived  
34  
35 histology changes, rather than effect of steroid withdrawal.[28]

36  
37  
38 In our study there was only borderline significance of positive association of 1-year eCrCl  
39  
40 with MMF in univariate analysis. This result is not very surprising since decreased renal  
41  
42 function is not a very sensitive marker of incipient IF/TA.

43  
44  
45 Mechanisms by which an average higher exposure to MMF was associated with slower  
46  
47 progression of IF/TA may be both immune and nonimmune. Because there was no  
48  
49 difference in incidence of acute rejection with respect to increased MMF exposure in our  
50  
51  
52  
53  
54  
55  
56  
57  
58  
59  
60

1  
2  
3 study, we believe that there may be a significant contribution of nonimmune mechanisms  
4 in retardation of IF/TA in patients with higher MMF. In line with this, in many  
5  
6 experimental models it has been shown that MMF has antiproliferative and antifibrotic  
7  
8 effect.[29-31] In the study of Jiang at al. using rat renal ischemia reperfusion injury, a  
9  
10 time- and dose-dependent correlation of higher MMF dose with better renal function and  
11  
12 lower interstitial fibrosis was demonstrated. Suggested potential mechanism was lower  
13  
14 expression of TGF- $\beta$ 1 and MCP-1 with lower macrophage infiltration.[32] In recent  
15  
16 clinical trials MMF was shown as a safe drug that could be a good candidate for  
17  
18 treatment of interstitial lung disease in systemic sclerosis.[33] Experimental model of  
19  
20 encapsulated peritoneal sclerosis in rats proved beneficial effect of MMF as an inhibitor  
21  
22 of neovascularisation.[34] Also, MMF monotherapy was associated with a positive effect  
23  
24 on hepatic fibrosis progression in HCV liver transplant recipients.[35]

25  
26 Our study has several shortcomings, such as its retrospective aspect and relatively short  
27  
28 study period. Although study period was limited to 12 months post transplantation, a  
29  
30 clear correlation of slower progression of IF/TA with higher average MMF dose  
31  
32 underlines potential benefit of these findings. As mentioned before, in current study we  
33  
34 did not analyze inflammation outside Banff acute rejection threshold in kidney biopsies  
35  
36 with respect to MMF dose. As inflammation in areas of IF/TA is an important predictor  
37  
38 of renal function and graft loss, this is subject of an ongoing work.

39  
40 In summary, higher MMF dose after kidney transplantation might slower progression of  
41  
42 IF/TA, which might lead to better long-term survival of transplanted kidney. Our study  
43  
44 may serve as a platform for a prospective, randomized, long-term trial with different  
45  
46 MMF doses to evaluate benefit of higher MMF dose in renal transplant recipients.  
47  
48  
49  
50  
51  
52  
53  
54  
55  
56  
57  
58  
59  
60

**Acknowledgments:**

This manuscript has not been published elsewhere, beside as a part of 2011 ASN Annual meeting abstract.

**Contributorship Statement:**

Karlo Mihovilović – participated in research design, collecting data, analyzing data and wrote the paper,

Bojana Maksimović - participated in collecting and analyzing data

Ivana Kovačević Vojtušek - participated in collecting data

Sonja Gracin - participated in collecting data

Branislav Kocman - participated in collecting data

Denis Guštin - participated in collecting data

Željko Vidas – participated in collecting data

Stela Bulimbašić - participated in collecting and analyzing data

Danica Galešić Ljubanović – participated in collecting and analyzing data

Mirjana Sabljar Matovinović – participated in collecting data

Mladen Knotek- proposed research design, analyzed data and participated in writing the paper

**Competing Interests**

None

**Data Sharing Statement**

There is no additional data

## Reference List

- 1 Pascual M, Theruvath T, Kawai T et al. Strategies to improve long-term outcomes after renal transplantation. *N Engl J Med* 2002; 346:580-590.
- 2 Kuypers DR, Chapman JR, O'Connell PJ et al. Predictors of renal transplant histology at three months. *Transplantation* 1999; 67:1222-1230.
- 3 Matas AJ, Gillingham KJ, Payne WD et al. The impact of an acute rejection episode on long-term renal allograft survival (t1/2). *Transplantation* 1994;57:857-859.
- 4 Nankivell BJ, Borrows RJ, Fung CL et al. The natural history of chronic allograft nephropathy. *N Engl J Med* 2003; 349:2326-2333.
- 5 Birnbaum LM, Lipman M, Paraskevas S et al. Management of chronic allograft nephropathy: a systematic review. *Clin J Am Soc Nephrol* 2009; 4:860-865.
- 6 Frimat L, Cassuto-Viguiet E, Charpentier B et al. Impact of cyclosporine reduction with MMF: a randomized trial in chronic allograft dysfunction. The 'reference' study. *Am J Transplant* 2006; 6:2725-2734.
- 7 Ekberg H, Tedesco-Silva H, Demirbas A et al. Reduced exposure to calcineurin inhibitors in renal transplantation. *N Engl J Med* 2007; 357:2562-2575.
- 8 Azuma H, Binder J, Heemann U et al. Effects of RS61443 on functional and morphological changes in chronically rejecting rat kidney allografts. *Transplantation* 1995; 59:460-466.
- 9 Ojo AO, Meier-Kriesche HU, Hanson JA et al. Mycophenolate mofetil reduces late renal allograft loss independent of acute rejection. *Transplantation* 2000; 69:2405-2409.
- 10 The Tricontinental Mycophenolate Mofetil Renal Transplantation Study Group. A blinded, randomized clinical trial of mycophenolate mofetil for the prevention of acute rejection in cadaveric renal transplantation. *Transplantation* 1996; 61:722-729.
- 11 European Mycophenolate Mofetil Cooperative Study Group. Placebo controlled study of mycophenolate mofetil combined with cyclosporin and corticosteroids for prevention of acute rejection. *Lancet* 1995; 345, 1321-1325.
- 12 Djamali A, Vidyasagar A, Yagci G et al. Mycophenolic acid may delay allograft fibrosis by inhibiting transforming growth factor-beta1-induced activation of

- 1  
2  
3  
4  
5  
6  
7  
8  
9  
10  
11  
12  
13  
14  
15  
16  
17  
18  
19  
20  
21  
22  
23  
24  
25  
26  
27  
28  
29  
30  
31  
32  
33  
34  
35  
36  
37  
38  
39  
40  
41  
42  
43  
44  
45  
46  
47  
48  
49  
50  
51  
52  
53  
54  
55  
56  
57  
58  
59  
60
- Nox-2 through the nuclear factor-kappaB pathway. *Transplantation* 2010;90:387-393.
- 13 Dell'Oglio MP, Zaza G, Rossini M et al. The anti-fibrotic effect of mycophenolic acid-induced neutral endopeptidase. *J Am Soc Nephrol* 2010; 21:2157-2168.
- 14 Solez K, Colvin RB, Racusen LC et al. Banff 07 classification of renal allograft pathology: updates and future directions. *Am J Transplant* 2008; 8:753-760.
- 15 Racusen LC, Solez K, Colvin RB et al. The Banff 97 working classification of renal allograft pathology. *Kidney Int* 1999; 55:713-723.
- 16 Roufosse CA, Shore I, Moss J et al. Peritubular capillary basement membrane multilayering on electron microscopy: a useful marker of early chronic antibody-mediated damage. *Transplantation* 2012; 94:269-274.
- 17 Nankivell BJ, Borrows RJ, Fung CL et al. The natural history of chronic allograft nephropathy. *N Engl J Med* 2003; 349:2326-2333.
- 18 Gelens MA, Steegh FM, van Hooff JP et al. Immunosuppressive Regimen and Interstitial Fibrosis and Tubules Atrophy at 12 Months Postrenal Transplant. *Clin J Am Soc Nephrol* 2012; 5:1010-1017.
- 19 Available at:  
[http://srtr.transplant.hrsa.gov/annual\\_reports/2011/pdf/01\\_kidney\\_12.pdf](http://srtr.transplant.hrsa.gov/annual_reports/2011/pdf/01_kidney_12.pdf). 2013.
- 20 Ekberg H, van GT, Kaplan B et al. Relationship of tacrolimus exposure and mycophenolate mofetil dose with renal function after renal transplantation. *Transplantation* 2011; 92:82-87.
- 21 Kamar N, Rostaing L, Cassuto E et al. A multicenter, randomized trial of increased mycophenolic acid dose using enteric-coated mycophenolate sodium with reduced tacrolimus exposure in maintenance kidney transplant recipients. *Clin Nephrol* 2012 ;77:126-136.
- 22 Ekberg H, van GT, Kaplan B et al. Relationship of tacrolimus exposure and mycophenolate mofetil dose with renal function after renal transplantation. *Transplantation* 2011; 92:82-87.
- 23 Remuzzi G, Lesti M, Gotti E et al. Mycophenolate mofetil versus azathioprine for prevention of acute rejection in renal transplantation (MYSS): a randomised trial. *Lancet* 2004; 364:503-512.
- 24 Lloberas N, Torras J, Cruzado JM et al. Influence of MRP2 on MPA pharmacokinetics in renal transplant recipients-results of the Pharmacogenomic Substudy within the Symphony Study. *Nephrol Dial Transplant* 2011; 26:3784-3793.

- 1  
2  
3  
4  
5  
6  
7  
8  
9  
10  
11  
12  
13  
14  
15  
16  
17  
18  
19  
20  
21  
22  
23  
24  
25  
26  
27  
28  
29  
30  
31  
32  
33  
34  
35  
36  
37  
38  
39  
40  
41  
42  
43  
44  
45  
46  
47  
48  
49  
50  
51  
52  
53  
54  
55  
56  
57  
58  
59  
60
- 25 Pascual M, Theruvath T, Kawai T et al. Strategies to improve long-term outcomes after renal transplantation. *N Engl J Med* 2002; 346:580-590.
- 26 El-Zoghby ZM, Stegall MD, Lager DJ et al. Identifying specific causes of kidney allograft loss. *Am J Transplant* 2009;9:527-535.
- 27 Matas AJ, Leduc R, Rush D et al. Histopathologic clusters differentiate subgroups within the nonspecific diagnoses of CAN or CR: preliminary data from the DeKAF study. *Am J Transplant* 2010; 10:315-323.
- 28 Woodle ES, First MR, Pirsch J et al. A prospective, randomized, double-blind, placebo-controlled multicenter trial comparing early (7 day) corticosteroid cessation versus long-term, low-dose corticosteroid therapy. *Ann Surg*; 248: 564-577.
- 29 Luo L, Sun Z, Wu W et al. Mycophenolate mofetil and FK506 have different effects on kidney allograft fibrosis in rats that underwent chronic allograft nephropathy. *BMC Nephrol* 2012;13:53.
- 30 Jiang S, Tang Q, Rong R et al. Mycophenolate mofetil inhibits macrophage infiltration and kidney fibrosis in long-term ischemia-reperfusion injury. *Eur J Pharmacol* 2012; 688:56-61.
- 31 Dell'Oglio MP, Zaza G, Rossini M et al. The anti-fibrotic effect of mycophenolic acid-induced neutral endopeptidase. *J Am Soc Nephrol* 2010; 21:2157-2168.
- 32 Jiang S, Tang Q, Rong R et al. Mycophenolate mofetil inhibits macrophage infiltration and kidney fibrosis in long-term ischemia-reperfusion injury. *Eur J Pharmacol* 2012; 688:56-61.
- 33 Tzouveleakis A, Galanopoulos N, Bouros E, Kolios G, Zacharis G, Ntoliou P, et al. Effect and safety of mycophenolate mofetil or sodium in systemic sclerosis-associated interstitial lung disease: a meta-analysis. *Pulm Med* 2012; 1-7.
- 34 Hur E, Bozkurt D, Timur O, Bicak S, Sarsik B, Akcicek F, et al. The effects of mycophenolate mofetil on encapsulated peritoneal sclerosis model in rats. *Clin Nephrol* 2012; 77:1-7.
- 35 Manzia TM, Angelico R, Toti L et al. Long-term, maintenance MMF monotherapy improves the fibrosis progression in liver transplant recipients with recurrent hepatitis C. *Transpl Int* 2011; 24:461-468.

Table 1. Baseline characteristics

|                                        |                                                                                                                                                               |               |
|----------------------------------------|---------------------------------------------------------------------------------------------------------------------------------------------------------------|---------------|
| <b>RECIPIENT CHARACTERISTICS</b>       | AGE (years)                                                                                                                                                   | 44.67 ± 12.03 |
|                                        | GENDER (f/m)                                                                                                                                                  | 25/54         |
|                                        | PRIMARY RENAL DISEASE<br>(diabetes mellitus,<br>polycystic kidney disease,<br>glomerulonephritis,<br>pyelonephritis/interstitial nephritis,<br>other/unknown) | 24/8/19/6/22  |
| <b>DONOR CHARACTERISTICS</b>           | DONOR SOURCE<br>(deceased/living)                                                                                                                             | 55/24         |
|                                        | AGE (years)                                                                                                                                                   | 43.89 ± 15.55 |
|                                        | GENDER (f/m)                                                                                                                                                  | 36/43         |
| <b>TRANSPLANTATION CHARACTERISTICS</b> | TRANSPLANTED ORGAN<br>(KIDNEY/SPKT)                                                                                                                           | 58/21         |
|                                        | INITIAL IMMUNOSUPPRESSION<br>(anti-IL2,TAC,MMF/anti-IL2,<br>CyA,MMF)                                                                                          | 53/26         |
|                                        | DELAYED GRAFT FUNCTION<br>(no/yes)                                                                                                                            | 53/26         |
|                                        | STEROID FREE (yes/no)                                                                                                                                         | 36/43         |
|                                        | HLA MM                                                                                                                                                        | 3.33 ± 1.51   |

Table 2. Multiple regression analysis of factors associated with kidney function

|                  | Beta<br>( $\beta$ ) | St.Err.<br>$\beta$ | p value |
|------------------|---------------------|--------------------|---------|
| Tx (kidney)      | -0.17               | 0.13               | 0.19    |
| DGF (no)         | 0.04                | 0.1                | 0.71    |
| Recipient age    | -0.41               | 0.1                | <0.001  |
| Donor age        | -0.1                | 0.14               | 0.45    |
| ci at 12 months  | -0.18               | 0.11               | 0.09    |
| Average MMF dose | 0.21                | 0.1                | 0.04    |



Table 3. Correlation of factors associated with progression of ci and ct scores

|                              | $\Delta$ ci                         |        | $\Delta$ ct                         |        |
|------------------------------|-------------------------------------|--------|-------------------------------------|--------|
|                              | mean $\pm$ SD                       | p      | mean $\pm$ SD                       | p      |
| Kidney vs. SPKT              | 0.86 $\pm$ 0.91 vs. 0.67 $\pm$ 0.73 | 0.51   | 0.85 $\pm$ 0.87 vs. 0.86 $\pm$ 0.65 | 0.74   |
| DGF (yes vs. no)             | 1.19 $\pm$ 0.98 vs. 0.62 $\pm$ 0.74 | 0.02   | 1.15 $\pm$ 0.92 vs. 0.69 $\pm$ 0.72 | 0.05   |
| Recipient gender (m vs. f)   | 0.83 $\pm$ 0.88 vs. 0.76 $\pm$ 0.83 | 0.78   | 0.91 $\pm$ 0.83 vs. 0.72 $\pm$ 0.79 | 0.35   |
| Donor gender (m vs. f)       | 0.91 $\pm$ 0.95 vs. 0.69 $\pm$ 0.75 | 0.43   | 0.88 $\pm$ 0.93 vs. 0.81 $\pm$ 0.67 | 0.96   |
| Donor source (D vs. L)       | 0.84 $\pm$ 0.88 vs. 0.75 $\pm$ 0.85 | 0.73   | 0.87 $\pm$ 0.82 vs. 0.79 $\pm$ 0.83 | 0.71   |
| Steroid free (yes vs. no)    | 1.09 $\pm$ 0.87 vs. 0.47 $\pm$ 0.74 | 0.002  | 1.07 $\pm$ 0.83 vs. 0.58 $\pm$ 0.73 | 0.01   |
| Acute rejection (yes vs. no) | 0.8 $\pm$ 0.89 vs. 0.83 $\pm$ 0.82  | 0.78   | 0.93 $\pm$ 0.84 vs. 0.67 $\pm$ 0.76 | 0.23   |
|                              | R                                   | p      | R                                   | p      |
| Recipient age                | -0.11                               | 0.33   | -0.11                               | 0.32   |
| Donor age                    | 0.17                                | 0.13   | 0.04                                | 0.73   |
| HLA MM                       | -0.09                               | 0.43   | -0.002                              | 0.99   |
| Average tacrolimus conc.     | -0.009                              | 0.95   | 0.003                               | 0.98   |
| Average MMF dose             | -0.37                               | <0.001 | -0.38                               | <0.001 |
| ci at implantation           | -0.32                               | 0.003  |                                     |        |
| ct at implantation           |                                     |        | -0.45                               | <0.001 |

Table 4. Multivariate general regression analysis for factors related to progression of ci and ct score

| $\Delta ci$        |                  |                   |        |
|--------------------|------------------|-------------------|--------|
|                    | Beta ( $\beta$ ) | Std. Err. $\beta$ | p      |
| ci0                | -0.43            | 0.09              | <0.001 |
| DGF (no)           | -0.22            | 0.11              | <0.05  |
| Average MMF dose   | -0.20            | 0.09              | <0.05  |
| Donor age          | 0.32             | 0.09              | <0.05  |
| Steroid free (yes) | -0.25            | 0.11              | 0.02   |
| $\Delta ct$        |                  |                   |        |
|                    | Beta ( $\beta$ ) | Std. Err. $\beta$ | p      |
| ct0                | -0.44            | 0.09              | <0.001 |
| Average MMF dose   | -0.29            | 0.1               | <0.05  |
| DGF (no)           | -0.29            | 0.1               | <0.05  |
| Steroid free (yes) | -0.09            | 0.11              | 0.39   |

Table 5. eCr<sub>cl</sub>, MMF dose and CNI concentration during first year post transplant

|                                       | Month posttransplant               |                                       |                                      |                                       |
|---------------------------------------|------------------------------------|---------------------------------------|--------------------------------------|---------------------------------------|
|                                       | 1                                  | 3                                     | 6                                    | 12                                    |
| eCr <sub>cl</sub> (ml/min)            |                                    | 56.98 ± 15.79                         | 58.94 ± 16.94                        | 61.47 ± 16.75                         |
| MMF dose (mg)                         | 2500 (750 – 4000)<br>2427 ± 643.17 | 2000 (750 – 4000)<br>2167.72 ± 733.49 | 2000 (1000-4000)<br>2188.29 ± 716.91 | 2000 (1000- 4000)<br>2193.04 ± 642.95 |
| Tacrolimus conc.<br>(µg/L)<br>(n=53)  | 10.79 ± 4.16                       | 9.69 ± 3.00                           | 9.03 ± 5.52                          | 7.83 ± 2.45                           |
| Cyclosporin conc.<br>(µg/L)<br>(n=26) | 335.07 (274 – 413)                 | 231.05 (181-265)                      | 206 (170 – 257)                      | 131 (125 – 171)                       |

Table 6. Association of variables with eCr<sub>cl</sub> on 1 year

|                                  | Estimated creatinine clearance (ml/min) | p value |
|----------------------------------|-----------------------------------------|---------|
| Kidney vs. SPKT                  | 57.88 ± 15.47 vs. 71.38 ± 13.45         | 0.001   |
| DGF (yes vs. no)                 | 56.15 ± 17.55 vs. 64.08 ± 15.87         | 0.05    |
| Recipient gender (m vs. f)       | 59.83 ± 16.02 vs. 65 ± 18.07            | 0.2     |
| Donor gender (m vs. f)           | 63.87 ± 16.71 vs. 58.60 ± 16.58         | 0.17    |
| Donor source (D vs. L)           | 62.36 ± 17.85 vs. 59.43 ± 14.05         | 0.47    |
| Steroid-free (yes vs. no)        | 63.94 ± 17.73 vs. 59.39 ± 15.81         | 0.23    |
| Acute rejection (yes vs. no)     | 61.64 ± 16.59 vs. 61.39 ± 16.97         | 0.95    |
|                                  | R                                       | p value |
| Recipient age                    | -0.45                                   | <0.001  |
| Donor age                        | -0.46                                   | <0.001  |
| HLA MM                           | 0.07                                    | 0.52    |
| Average tacrolimus concentration | -0.02                                   | 0.9     |
| Average MMF dose                 | 0.18                                    | 0.1     |
| ci at 1 year post Tx             | -0.34                                   | 0.002   |
| ct at 1 year post Tx             | -0.35                                   | 0.002   |
| cv at 1 year post Tx             | -0.20                                   | 0.07    |

Table 7. One-year progression of chronic allograft scores

| Banff score                  | N  | At transplantation | N  | 12 month    | p      |
|------------------------------|----|--------------------|----|-------------|--------|
| Interstitial fibrosis (ci)   | 79 | 0.16 ± 0.44        | 79 | 0.94 ± 0.85 | <0.001 |
| Tubular atrophy (ct)         | 79 | 0.24 ± 0.46        | 79 | 1.05 ± 0.77 | <0.001 |
| Chronic glomerulopathy (cg)  | 79 | 0                  | 79 | 0           |        |
| Mesangial matrix (mm)        | 79 | 0.01 ± 0.11        | 79 | 0.09 ± 0.36 | 0.09   |
| Fibrointimal thickening (cv) | 76 | 0.37 ± 0.83        | 78 | 0.29 ± 0.70 | 0.47   |
| Arteriolar hyalinosis (ah)   | 78 | 0.68 ± 1.04        | 79 | 0.79 ± 1.04 | 0.26   |

1  
2  
3  
4  
5  
6  
7  
8  
9  
10  
11  
12  
13  
14  
15  
16  
17  
18  
19  
20  
21  
22  
23  
24  
25  
26  
27  
28  
29  
30  
31  
32  
33  
34  
35  
36  
37  
38  
39  
40  
41  
42  
43  
44  
45  
46  
47  
48  
49  
50  
51  
52  
53  
54  
55  
56  
57  
58  
59  
60

For peer review only

1  
2  
3  
4  
5  
6  
7  
8  
9  
10  
11  
12  
13  
14  
15  
16  
17  
18  
19  
20  
21  
22  
23  
24  
25  
26  
27  
28  
29  
30  
31  
32  
33  
34  
35  
36  
37  
38  
39  
40  
41  
42  
43  
44  
45  
46  
47  
48  
49  
50  
51  
52  
53  
54  
55  
56  
57  
58  
59  
60

Figure 1: Estimated creatinine clearance during first year posttransplant

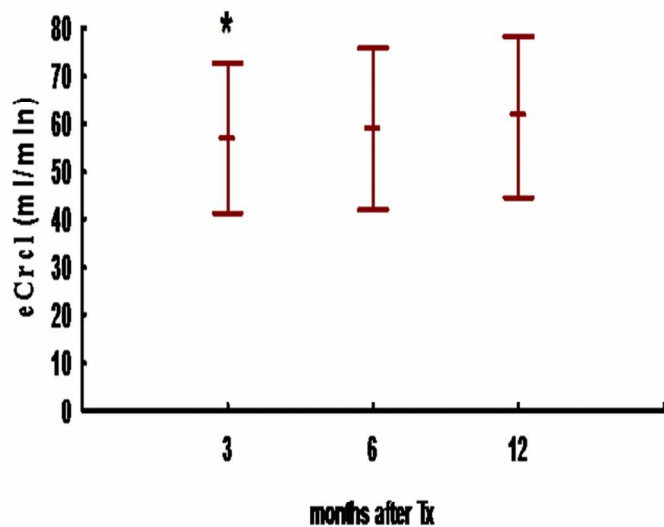

\*, p<0.001; 3 month vs. 12 months eCrCl. Values are shown as mean ± SD

108x108mm (300 x 300 DPI)

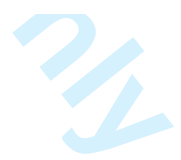

1  
2  
3  
4  
5  
6  
7  
8  
9  
10  
11  
12  
13  
14  
15  
16  
17  
18  
19  
20  
21  
22  
23  
24  
25  
26  
27  
28  
29  
30  
31  
32  
33  
34  
35  
36  
37  
38  
39  
40  
41  
42  
43  
44  
45  
46  
47  
48  
49  
50  
51  
52  
53  
54  
55  
56  
57  
58  
59  
60

Figure 1A: Correlation between average MMF dose and progression of ci score

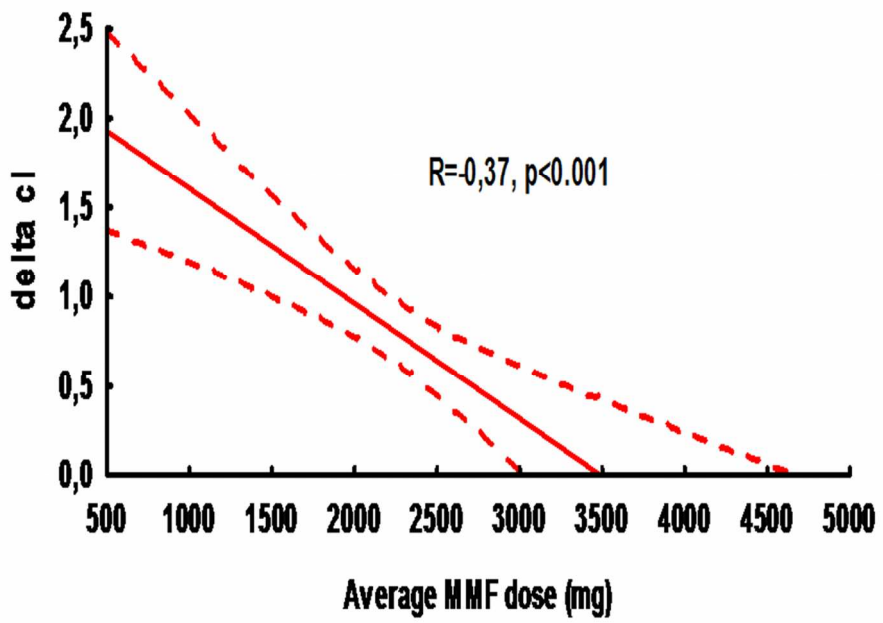

108x108mm (300 x 300 DPI)





Figure 1B: Correlation between average MMF dose and progression of ct score

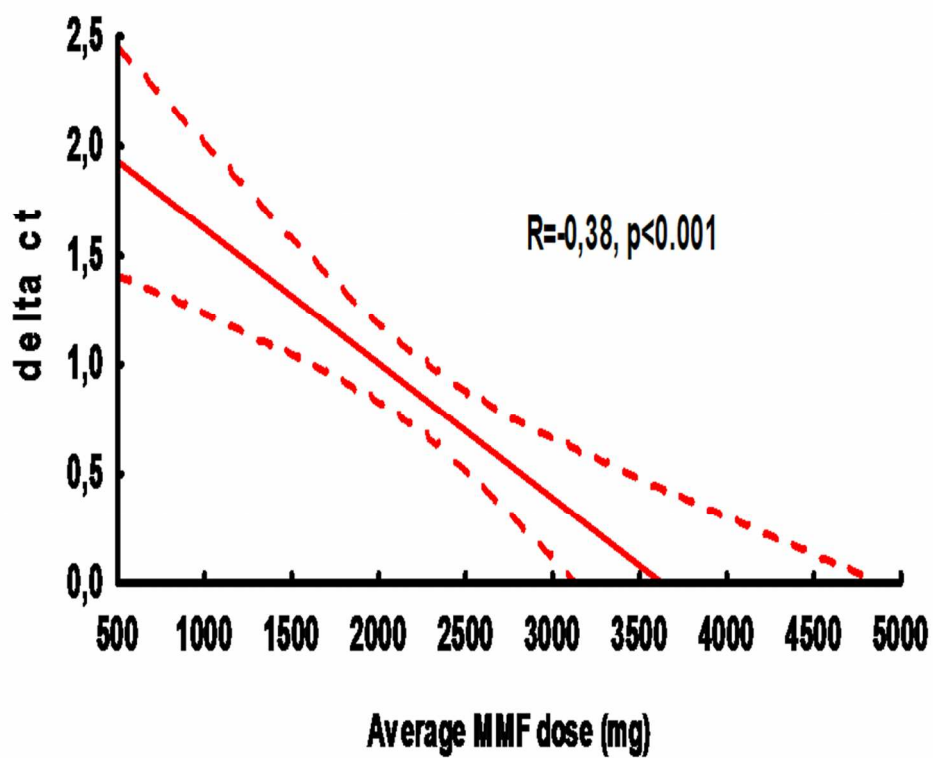

108x108mm (300 x 300 DPI)

1  
2  
3  
4  
5  
6  
7  
8  
9  
10  
11  
12  
13  
14  
15  
16  
17  
18  
19  
20  
21  
22  
23  
24  
25  
26  
27  
28  
29  
30  
31  
32  
33  
34  
35  
36  
37  
38  
39  
40  
41  
42  
43  
44  
45  
46  
47  
48  
49  
50  
51  
52  
53  
54  
55  
56  
57  
58  
59  
60

Figure 2A: Estimated creatinine clearance by ci score

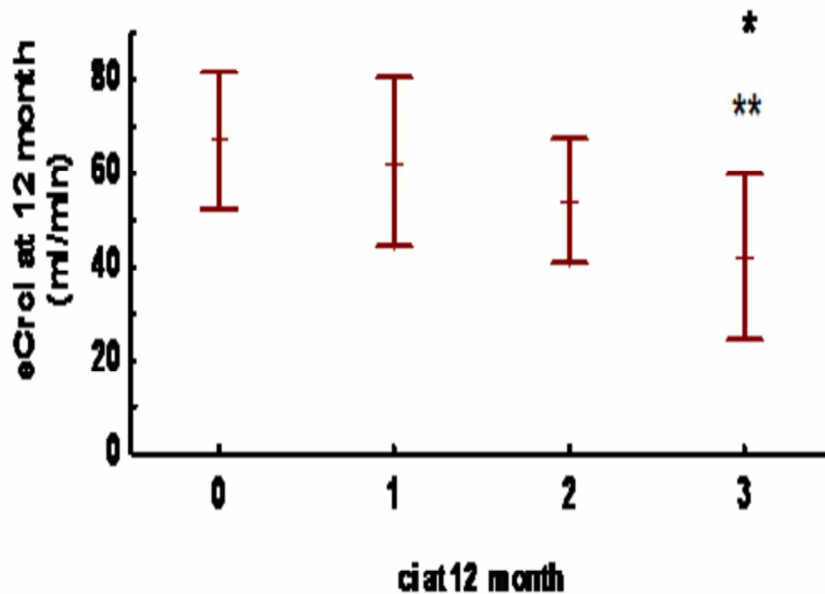

\* p<0.05; score ci 0 vs. score ci 3 (*post hoc* Newman-Keuls test)

\*\* p=0.03; score ci 1 vs. score ci 3

Values are shown as mean ± SD

108x108mm (300 x 300 DPI)



Figure 2B: Estimated creatinine clearance by ct score

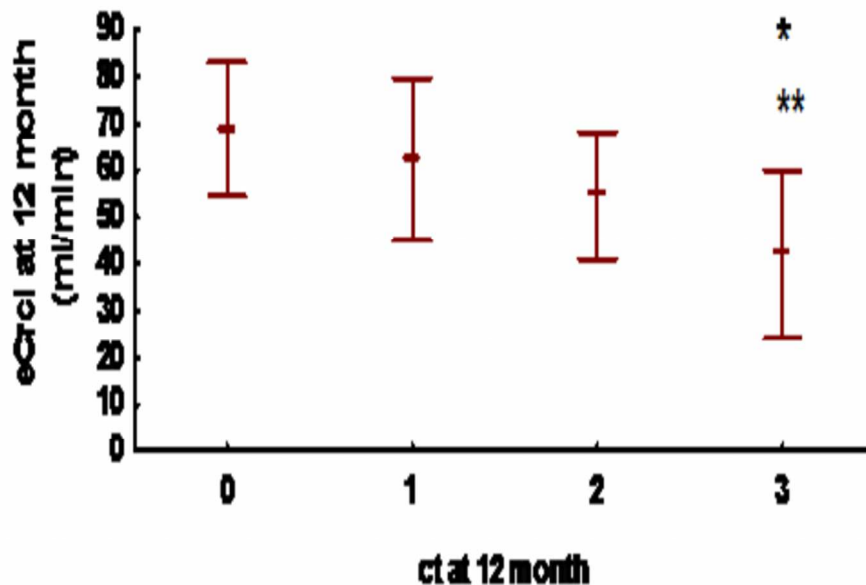

\*  $p < 0.05$ ; score ct 0 vs. score ct 3 (post hoc Newman-Keuls test)

\*\*  $p = 0.03$ ; score ct 1 vs. score ct 3

Values are shown as mean  $\pm$  SD

108x108mm (300 x 300 DPI)

BMJ

## STROBE Statement—checklist of items that should be included in reports of observational studies

|                           | Item No/page number | Recommendation                                                                                                                                                                                                                                                                                                                                                                                                                                                                                                                                                                                                                                                                                   |
|---------------------------|---------------------|--------------------------------------------------------------------------------------------------------------------------------------------------------------------------------------------------------------------------------------------------------------------------------------------------------------------------------------------------------------------------------------------------------------------------------------------------------------------------------------------------------------------------------------------------------------------------------------------------------------------------------------------------------------------------------------------------|
| <b>Title and abstract</b> | 1/1                 | (a) Indicate the study's design with a commonly used term in the title or the abstract<br>(b) Provide in the abstract an informative and balanced summary of what was done and what was found                                                                                                                                                                                                                                                                                                                                                                                                                                                                                                    |
| <b>Introduction</b>       |                     |                                                                                                                                                                                                                                                                                                                                                                                                                                                                                                                                                                                                                                                                                                  |
| Background/rationale      | 2/5                 | Explain the scientific background and rationale for the investigation being reported                                                                                                                                                                                                                                                                                                                                                                                                                                                                                                                                                                                                             |
| Objectives                | 3/5,6               | State specific objectives, including any prespecified hypotheses                                                                                                                                                                                                                                                                                                                                                                                                                                                                                                                                                                                                                                 |
| <b>Methods</b>            |                     |                                                                                                                                                                                                                                                                                                                                                                                                                                                                                                                                                                                                                                                                                                  |
| Study design              | 4/6                 | Present key elements of study design early in the paper                                                                                                                                                                                                                                                                                                                                                                                                                                                                                                                                                                                                                                          |
| Setting                   | 5/6,7,8,9           | Describe the setting, locations, and relevant dates, including periods of recruitment, exposure, follow-up, and data collection                                                                                                                                                                                                                                                                                                                                                                                                                                                                                                                                                                  |
| Participants              | 6/6                 | (a) <i>Cohort study</i> —Give the eligibility criteria, and the sources and methods of selection of participants. Describe methods of follow-up<br><i>Case-control study</i> —Give the eligibility criteria, and the sources and methods of case ascertainment and control selection. Give the rationale for the choice of cases and controls<br><i>Cross-sectional study</i> —Give the eligibility criteria, and the sources and methods of selection of participants<br>(b) <i>Cohort study</i> —For matched studies, give matching criteria and number of exposed and unexposed<br><i>Case-control study</i> —For matched studies, give matching criteria and the number of controls per case |
| Variables                 | 7/6,7,8             | Clearly define all outcomes, exposures, predictors, potential confounders, and effect modifiers. Give diagnostic criteria, if applicable                                                                                                                                                                                                                                                                                                                                                                                                                                                                                                                                                         |
| Data sources/measurement  | 8*/8                | For each variable of interest, give sources of data and details of methods of assessment (measurement). Describe comparability of assessment methods if there is more than one group                                                                                                                                                                                                                                                                                                                                                                                                                                                                                                             |
| Bias                      | 9                   | Describe any efforts to address potential sources of bias                                                                                                                                                                                                                                                                                                                                                                                                                                                                                                                                                                                                                                        |
| Study size                | 10/6                | Explain how the study size was arrived at                                                                                                                                                                                                                                                                                                                                                                                                                                                                                                                                                                                                                                                        |
| Quantitative variables    | 11/9                | Explain how quantitative variables were handled in the analyses. If applicable, describe which groupings were chosen and why                                                                                                                                                                                                                                                                                                                                                                                                                                                                                                                                                                     |
| Statistical methods       | 12/9                | (a) Describe all statistical methods, including those used to control for confounding<br>(b) Describe any methods used to examine subgroups and interactions<br>(c) Explain how missing data were addressed<br>(d) <i>Cohort study</i> —If applicable, explain how loss to follow-up was addressed<br><i>Case-control study</i> —If applicable, explain how matching of cases and controls was addressed<br><i>Cross-sectional study</i> —If applicable, describe analytical methods taking account of sampling strategy<br>(e) Describe any sensitivity analyses                                                                                                                                |

Continued on next page

**Results**

|                  |                  |                                                                                                                                                                                                                                                                                                                                                                                                               |
|------------------|------------------|---------------------------------------------------------------------------------------------------------------------------------------------------------------------------------------------------------------------------------------------------------------------------------------------------------------------------------------------------------------------------------------------------------------|
| Participants     | 13*<br>/9,<br>10 | (a) Report numbers of individuals at each stage of study—eg numbers potentially eligible, examined for eligibility, confirmed eligible, included in the study, completing follow-up, and analysed<br>(b) Give reasons for non-participation at each stage<br>(c) Consider use of a flow diagram                                                                                                               |
| Descriptive data | 14*<br>/9,<br>10 | (a) Give characteristics of study participants (eg demographic, clinical, social) and information on exposures and potential confounders<br>(b) Indicate number of participants with missing data for each variable of interest<br>(c) <i>Cohort study</i> —Summarise follow-up time (eg, average and total amount)                                                                                           |
| Outcome data     | 15*<br>/11       | <i>Cohort study</i> —Report numbers of outcome events or summary measures over time<br><i>Case-control study</i> —Report numbers in each exposure category, or summary measures of exposure<br><i>Cross-sectional study</i> —Report numbers of outcome events or summary measures                                                                                                                             |
| Main results     | 16/<br>10,<br>11 | (a) Give unadjusted estimates and, if applicable, confounder-adjusted estimates and their precision (eg, 95% confidence interval). Make clear which confounders were adjusted for and why they were included<br>(b) Report category boundaries when continuous variables were categorized<br>(c) If relevant, consider translating estimates of relative risk into absolute risk for a meaningful time period |
| Other analyses   | 17               | Report other analyses done—eg analyses of subgroups and interactions, and sensitivity analyses                                                                                                                                                                                                                                                                                                                |

**Discussion**

|                  |                  |                                                                                                                                                                            |
|------------------|------------------|----------------------------------------------------------------------------------------------------------------------------------------------------------------------------|
| Key results      | 18/<br>12        | Summarise key results with reference to study objectives                                                                                                                   |
| Limitations      | 19/<br>16        | Discuss limitations of the study, taking into account sources of potential bias or imprecision. Discuss both direction and magnitude of any potential bias                 |
| Interpretation   | 20/<br>12-<br>16 | Give a cautious overall interpretation of results considering objectives, limitations, multiplicity of analyses, results from similar studies, and other relevant evidence |
| Generalisability | 21/<br>12-<br>16 | Discuss the generalisability (external validity) of the study results                                                                                                      |

**Other information**

|         |          |                                                                                                                                                               |
|---------|----------|---------------------------------------------------------------------------------------------------------------------------------------------------------------|
| Funding | 22/<br>2 | Give the source of funding and the role of the funders for the present study and, if applicable, for the original study on which the present article is based |
|---------|----------|---------------------------------------------------------------------------------------------------------------------------------------------------------------|

\*Give information separately for cases and controls in case-control studies and, if applicable, for exposed and unexposed groups in cohort and cross-sectional studies.

**Note:** An Explanation and Elaboration article discusses each checklist item and gives methodological background and published examples of transparent reporting. The STROBE checklist is best used in conjunction with this article (freely available on the Web sites of PLoS Medicine at <http://www.plosmedicine.org/>, Annals of Internal Medicine at <http://www.annals.org/>, and Epidemiology at <http://www.epidem.com/>). Information on the STROBE Initiative is available at [www.strobe-statement.org](http://www.strobe-statement.org).

# BMJ Open

## Effect of Mycophenolate Mofetil on Progression of Interstitial Fibrosis and Tubular Atrophy after Kidney Transplantation- A Retrospective Study

|                                 |                                                                                                                                                                                                                                                                                                                                                                                                                                                                                                                                                                                                                                                                                  |
|---------------------------------|----------------------------------------------------------------------------------------------------------------------------------------------------------------------------------------------------------------------------------------------------------------------------------------------------------------------------------------------------------------------------------------------------------------------------------------------------------------------------------------------------------------------------------------------------------------------------------------------------------------------------------------------------------------------------------|
| Journal:                        | <i>BMJ Open</i>                                                                                                                                                                                                                                                                                                                                                                                                                                                                                                                                                                                                                                                                  |
| Manuscript ID:                  | bmjopen-2014-005005.R1                                                                                                                                                                                                                                                                                                                                                                                                                                                                                                                                                                                                                                                           |
| Article Type:                   | Research                                                                                                                                                                                                                                                                                                                                                                                                                                                                                                                                                                                                                                                                         |
| Date Submitted by the Author:   | 03-May-2014                                                                                                                                                                                                                                                                                                                                                                                                                                                                                                                                                                                                                                                                      |
| Complete List of Authors:       | Mihovilovic, Karlo; University Hospital Merkur, Division of nephrology<br>Maksimovic, Bojana; University Hospital Merkur, Division of nephrology<br>Kocman, Branislav; University Hospital Merkur, Department of surgery<br>Gustin, Denis; University hospital Merkur, Department of anesthesiology<br>Vidas, Zeljko; University Hospital Merkur, Department of urology<br>Bulimbasic, Stela; University Hospital Dubrava, Department of pathology<br>Ljubanovic, Danica; University Hospital Dubrava, Department of pathology<br>Matovinovic, Mirjana; University Hospital Merkur, Division of nephrology<br>Knotek, Mladen; University Hospital Merkur, Division of nephrology |
| <b>Primary Subject Heading</b>: | Renal medicine                                                                                                                                                                                                                                                                                                                                                                                                                                                                                                                                                                                                                                                                   |
| Secondary Subject Heading:      | Pharmacology and therapeutics, Renal medicine, Pathology                                                                                                                                                                                                                                                                                                                                                                                                                                                                                                                                                                                                                         |
| Keywords:                       | Histopathology < PATHOLOGY, TRANSPLANT MEDICINE, Renal transplantation < NEPHROLOGY                                                                                                                                                                                                                                                                                                                                                                                                                                                                                                                                                                                              |
|                                 |                                                                                                                                                                                                                                                                                                                                                                                                                                                                                                                                                                                                                                                                                  |

SCHOLARONE™  
Manuscripts

only

1  
2  
3 **Effect of Mycophenolate Mofetil on Progression of Interstitial Fibrosis and Tubular**  
4  
5 **Atrophy after Kidney Transplantation - A Retrospective Study**  
6  
7  
8  
9

10 Karlo Mihovilović<sup>1</sup>, Bojana Maksimović<sup>1</sup>, Branislav Kocman<sup>2</sup>, Denis Guštin<sup>3</sup>, Željko Vidas<sup>4</sup>,  
11  
12 Stela Bulimbašić<sup>6</sup>, Danica Galešić Ljubanović<sup>5,6</sup>, Mirjana Sabljar Matovinović<sup>1</sup>, Mladen  
13  
14  
15 Knotek<sup>1,5</sup>  
16  
17  
18  
19

20  
21 Clinical Hospital Merkur: <sup>1</sup>Department of Medicine, Renal Division, <sup>2</sup>Department of Surgery,  
22  
23 <sup>3</sup>Department of Anaesthesiology, <sup>4</sup>Department of Urology; <sup>5</sup>University of Zagreb School of  
24  
25  
26 Medicine, Zagreb, Croatia, Clinical Hospital Dubrava: <sup>6</sup>Department of Pathology  
27  
28  
29

30 **Keywords:** interstitial fibrosis, tubular atrophy, kidney function, myophenolate mofetil  
31

32 Word count: Abstract-238  
33

34 Manuscript- 3049  
35

36 **Number of tables: 8**  
37

38 **Number of figures: 3**  
39  
40

41 **Corresponding author:** Dr. Mladen Knotek  
42

43 Department of Medicine, Renal Division  
44

45 Clinical Hospital Merkur  
46

47 Zajceva 19  
48

49 10000 Zagreb  
50

51 Croatia  
52

53 e-mail: mladen.knotek1@zg.t-com.hr (this e-mail address can be published)  
54

55 phone: +38512431123, fax: +38512431123  
56  
57  
58  
59  
60

**ABSTRACT:**

**Objectives** - Chronic transplant dysfunction after kidney transplantation is major reason of kidney graft loss and is caused by immunological and non-immunological factors.

There is evidence that mycophenolate mofetil (MMF) may exert a positive effect on renal damage in addition to immunosuppression, by its direct antifibrotic properties. The aim of our study was to retrospectively investigate role of MMF dose on progression of chronic allograft dysfunction and IF/TA.

**Setting** - Retrospective, cohort study.

**Participants** - Kidney transplant patients in tertiary care institution. This is a retrospective cohort study that included 79 patients with kidney and kidney-pancreas transplantation. Immunosuppression consisted of anti-IL2 antibody induction, MMF, a calcineurin inhibitor  $\pm$  steroids.

**Primary outcome measures** - An association of average MMF dose over 1 year post transplant with progression of interstitial fibrosis ( $\Delta$ ci), tubular atrophy ( $\Delta$ ct) and estimated creatinine clearance (eCrcl) at 1 year post transplant was evaluated using univariate and multivariate analyses.

**Results** - Higher average MMF dose was significantly independently associated with better eCrcl at 1 year post transplant ( $b=0.21 \pm 0.1$ ,  $p=0.04$ ). In multiple regression analysis lower  $\Delta$ ci ( $b=-0.2 \pm 0.09$ ,  $p=0.05$ ) and  $\Delta$ ct ( $b=-0.29 \pm 0.1$ ,  $p=0.02$ ) were independently associated with greater average MMF dose. There was no correlation between average MMF dose and incidence of acute rejection ( $p=0.68$ ).



1  
2  
3 **Conclusions** - Higher average MMF dose over 1 year is associated with better renal  
4  
5 function and slower progression of IF/TA, at least partly independent of its  
6  
7 immunosuppressive effects.  
8  
9

### 10 11 12 **Strengths and limitations of this study**

13  
14 Important novel finding in our study is that greater average MMF exposure was strongly  
15  
16 negatively correlated with IF/TA progression during first year after kidney  
17  
18 transplantation. Patients on higher average dose of MMF (up to 4 g daily) during 1 year  
19  
20 post transplantation had significantly lower progression of graft interstitial fibrosis and  
21  
22 tubular atrophy. This is important finding, because of predictive value of graft IF/TA and  
23  
24 should translate into better long-term graft survival. Our study has several shortcomings,  
25  
26 such as its retrospective aspect and relatively short study period. As it was not aim of the  
27  
28 study, we did not report side effects associated with different dosage of MMF.  
29  
30  
31  
32  
33  
34  
35  
36  
37  
38  
39  
40  
41  
42  
43  
44  
45  
46  
47  
48  
49  
50  
51  
52  
53  
54  
55  
56  
57  
58  
59  
60

## INTRODUCTION:

Kidney transplantation significantly improves patient survival and quality of life comparing to dialysis. While significant improvements have been made in the treatment of acute rejection and short survival of transplanted kidney, there has not been major improvement in the long-term survival of transplanted kidney.[1] Chronic transplant dysfunction after kidney transplantation is major cause of kidney graft loss and is evoked by immunological and non-immunological factors.[2, 3] Histology changes that determine chronic transplant dysfunction are interstitial fibrosis and tubular atrophy (IF/TA), arteriosclerosis, arteriolar hyalinosis, glomerulopathy and mesangial matrix expansion.[4] IF/TA is the major pathohistology finding that can be verified on graft biopsies after kidney transplantation and is a predictor of long-term allograft function.[4] Clinical factors that affect progression of IF/TA are: recipient age, HLA mismatch, episodes of severe acute rejection, chronic rejection (esp. antibody-mediated), use of calcineurin inhibitors and BK nephropathy. Avoidance of CNI toxicity is considered as an important step to slow progression of IF/TA.[4-7] Mycophenolate mofetil (MMF) may help lowering CNI toxicity, by allowing lower CNI exposure.[7] MMF reduces the risk of acute allograft rejection, without nephrotoxic side effects and is ideal candidate for long-term calcineurin drug reduction treatment strategies.[7] Retrospective studies of renal recipients who were treated with mycophenolate mofetil comparing azathioprin showed that MMF treated patients had significantly less chronic allograft dysfunction.[8, 9] Besides being associated with lower acute rejection rates as compared to azathioprin,[10, 11] evidence from animal and human studies suggests that

1  
2  
3 MMF may also exert a direct antifibrotic properties due to its antiproliferative action on  
4 nonimmune cells, including renal tubular cells and vascular smooth muscle cells.[12, 13]  
5  
6

7  
8 The aim of our study was to investigate role of mycophenolate mofetil dose on  
9 progression of IF/TA in kidney transplant recipients.  
10  
11

## 12 13 14 15 PATIENTS AND METHODS: 16

### 17 18 19 20 *Patients:* 21

22 This is a retrospective study conducted at Clinical Hospital “Mercur”. This study  
23 represents a part of the posttransplant immune monitoring at the Mercur hospital,  
24 approved by the Hospital Ethics Committee. Patients gave there informed written consent for  
25 anonymized transplant data collection for research purposes. The study included 79 patients  
26 with kidney and kidney-pancreas transplantation, transplanted between 2003 and 2011.  
27 Eligible patients had to have protocol kidney biopsy at the time of implantation and 12  
28 months after transplantation. Exclusion criteria have been: dual kidney transplantation,  
29 kidney-liver transplantation, use of antithymocyte immunoglobulin, BK nephropathy and  
30 recurrence of glomerulonephritis after transplantation.  
31  
32  
33  
34  
35  
36  
37  
38  
39  
40  
41  
42  
43  
44  
45  
46  
47  
48  
49  
50  
51  
52

### 53 *Immunosuppression:* 54 55 56 57 58 59 60

1  
2  
3 Induction immunosuppression consisted of an anti-IL2 antibody (daclizumab or  
4 basiliximab), calcineurin inhibitor (tacrolimus or cyclosporine), MMF and  
5  
6 methylprednisolone. Maintenance immunosuppression consisted of a calcineurin  
7  
8 inhibitor (tacrolimus or cyclosporine), MMF  $\pm$  steroids. Target cyclosporine trough  
9  
10 concentrations were 250-350 during first month posttransplant, 200-300 during second to  
11  
12 6<sup>th</sup> month and 100-150  $\mu$ g/L thereafter. Target tacrolimus trough levels were 10-12  
13  
14 during first month, 8-10 during second to 6<sup>th</sup> month and 5-8  $\mu$ g/L thereafter.  
15  
16

17  
18 Mycophenolic acid target trough concentration was aimed to be higher than 7.2  $\mu$ mol/L  
19  
20 with tacrolimus and higher than 5  $\mu$ mol/L with cyclosporine use.  
21  
22

23  
24 Daclizumab was administered at day 0: 2mg/kg i.v. before opening of vascular  
25  
26 anastomosis and at day 14: 2mg/kg i.v.. Basiliximab was administered at day 0: 20 mg  
27  
28 i.v. before opening of vascular anastomosis and at day 4: 20 mg i.v..  
29  
30

31  
32 Steroids have been dosed as follows: day 0: intraoperatively 500 mg of  
33  
34 methylprednisolone, day 1: 250 mg, day 2: 125mg, day 3: 80 mg and day 4: 40 mg. In  
35  
36 patients with early steroid withdrawal steroids have been withdrawn at day 5 after  
37  
38 transplantation. In patients maintained on steroids, nadir dose of prednisone was 5 mg/d,  
39  
40 achieved by 6 months. The criteria for early elimination of steroids were low  
41  
42 immunological risk of the recipient (absence of, or low degree of HLA sensitization,  
43  
44 i.e. PRA <10%) and good immediate renal function, as well as absence of an episode of  
45  
46 acute rejection within 5 days after the transplantation. Steroids have been reintroduced in  
47  
48 patients who suffered acute rejection episode.  
49  
50  
51  
52  
53  
54  
55  
56  
57  
58  
59  
60

1  
2  
3 As prophylaxis for viral (HSV, CMV), fungal (Candida spp.) urinary and P. jiroveci  
4  
5 infections, low-dose fluconazole (for one year), valganciclovir (universally for three  
6  
7 months) and sulfomethoxazol and trimethoprim (for one year) was used.  
8  
9

10  
11  
12  
13  
14  
15  
16  
17  
18  
19  
20 *Renal allograft biopsies:*

21  
22 Protocol kidney biopsies were done at implantation, 1, 3, 6 and 12 months after  
23  
24 transplantation. For cause biopsies were done in case of unexplained deterioration of  
25  
26 renal function, or once weekly in patients with DGF. All rejection episodes were  
27  
28 histologically confirmed. Histopathological analysis was performed by either of two  
29  
30 pathologists who were blinded for immunosuppression. Acute rejections and chronic  
31  
32 allograft scores have been analyzed using Banff 97 classification and its updates.[14, 15]  
33  
34

35  
36 All protocol and indication biopsies were analyzed by light microscopy, by  
37  
38 immunofluorescence for C4d, and if indicated by immunohistochemistry for BK virus.  
39  
40 Biopsies at 1 year post transplant have been also analyzed by electron microscopy for  
41  
42 signs of chronic antibody-mediated rejection (transplant glomerulopathy, peritubular  
43  
44 capillary basement membrane multilayering).[16]  
45  
46  
47  
48

49  
50  
51 *Clinical outcome parameters:*

52  
53 Progression of chronic allograft scores during 1 year posttransplant was calculated by  
54  
55 subtracting implantation chronic scores from chronic allograft scores 12 months  
56  
57  
58  
59  
60

1  
2  
3 posttransplant: interstitial fibrosis ( $\Delta ci$ ), tubular atrophy ( $\Delta ct$ ), glomerulosclerosis ( $\Delta cg$ ),  
4  
5 mesangial matrix increase ( $\Delta mm$ ), vasculopathy ( $\Delta cv$ ) and arteriolar hyalinosis ( $\Delta ah$ ).  
6  
7  
8 Estimated creatinine clearance ( $eCr_{cl}$ ) at 3, 6 and 12 months posttransplant was calculated  
9  
10 using Cockcroft-Gault formula. Acute rejections with Banff grade IA and IB were treated  
11  
12 with three 500 mg methylprednisolone pulses. In case of acute rejection grade IIA or  
13  
14 greater, patients have been treated with antithymocyte globulin. Antibody-mediated  
15  
16 rejections were treated with steroid pulse and plasmapheresis.  
17  
18

19  
20 Average dose of MMF during 1 year posttransplant was calculated from MMF dose at  
21  
22 month 1, 3, 6 and 12.  
23

24  
25 Adverse effects analysed were clinically significant leucopenia, defined as white blood  
26  
27 cell count less than 3000/ml, time to first symptomatic infection and number of  
28  
29 symptomatic infection episodes per patient during first post transplant year.  
30  
31

### 32 33 34 *Statistical analysis:*

35  
36 Numerical data are presented as mean  $\pm$  SD or median with range in case of not normal  
37  
38 distribution. Normality of distribution has been tested with Kolmogorov-Smirnov test.  
39  
40 Correlation between two continuous variables has been tested using Spearman  
41  
42 nonparametric correlation. Difference between two groups in continuous variables has  
43  
44 been tested with student t-test or with Mann–Whitney test in non-normally distributed  
45  
46 variables. The significance of the progression in chronic scores was analyzed using  
47  
48 Wilcoxon Matched Pairs test. Univariate and multiple linear regression analysis were  
49  
50 performed to determine predictive factors for progression of chronic allograft scores and  
51  
52 kidney function at 12 months after transplantation. All variables that were associated with  
53  
54  
55  
56  
57  
58  
59  
60

1  
2  
3  
4  
5  
6  
7  
8  
9  
10  
11  
12  
13  
14  
15  
16  
17  
18  
19  
20  
21  
22  
23  
24  
25  
26  
27  
28  
29  
30  
31  
32  
33  
34  
35  
36  
37  
38  
39  
40  
41  
42  
43  
44  
45  
46  
47  
48  
49  
50  
51  
52  
53  
54  
55  
56  
57  
58  
59  
60

respective outcome in bivariate analysis (at  $p \leq 0.1$ ) were included in multivariate analysis. Because of colinearity between ci and ct score, only one score was included in each multivariate analysis. Statistical significance was considered at  $p < 0.05$ . All statistical analyses were performed using Statistica 10 (StatSoft, Tulsa, OK, USA).

## RESULTS:

### *Patient and transplant characteristics:*

Patient characteristics are shown in Table 1. Recipients were a mean of  $44.67 \pm 12.03$  years old at the time of transplantation, 68 percent of them were male and all were Caucasians. 33 percent of recipients had DGF after transplantation. Donors were a mean of  $43.89 \pm 15.55$  years old and 54 percent of them were male. Number of living donor transplantations was 24 (30 percent). Average daily MMF dose during 1 year posttransplant was  $2244 \pm 585$  mg (1062 – 4000) (Table 2). As expected, there was no correlation of MMF dose with MMF trough concentration ( $R = -0.13$ ;  $p = 0.28$ ). Also, there was no correlation between MMF dose with tacrolimus concentration ( $R = -0.04$ ;  $p = 0.79$ ). Early steroid withdrawal was done in 46 percent of patients after transplantation. Incidence of subclinical and clinical acute rejections greater than borderline was 30 percent in first year. There was no correlation between average MMF dose and incidence of acute rejection ( $p = 0.68$ ).

1  
2  
3  
4  
5  
6  
7  
8  
9  
10  
11  
12  
13  
14  
15  
16  
17  
18  
19  
20  
21  
22  
23  
24  
25  
26  
27  
28  
29  
30  
31  
32  
33  
34  
35  
36  
37  
38  
39  
40  
41  
42  
43  
44  
45  
46  
47  
48  
49  
50  
51  
52  
53  
54  
55  
56  
57  
58  
59  
60

*Factors associating with eCr<sub>cl</sub>:*

Kidney function increased during 1st year post transplant. eCr<sub>cl</sub> at month 3 was  $56.98 \pm 15.78$  ml/min, at 6 month  $58.94 \pm 16.94$  ml/min and at 12 month  $61.47 \pm 16.75$  ml/min ( $p < 0.001$ ; 12 months vs. 3 months) (Figure 1.) eCr<sub>cl</sub> at 1 year post transplant was greater in SPKT recipients ( $71.38 \pm 13.45$  ml/min vs.  $57.88 \pm 16.47$  ml/min;  $p = 0.001$ ) and in patients who did not have DGF ( $64.08 \pm 15.87$  ml/min vs.  $56.15 \pm 17.55$  ml/min;  $p = 0.05$ ). Donor age ( $R = -0.46$ ;  $p < 0.001$ ) and recipient age ( $R = -0.46$ ;  $p < 0.001$ ) negatively correlated with eCr<sub>cl</sub> at 1 year post transplant, while there was no correlation of renal function with donor and recipient gender, type of donation (deceased vs. living), HLA MM, average CNI concentration, steroid-free regimen of immunosuppression, or history of acute rejection (Table 3). In univariate analysis allograft function at 12 month post Tx was also negatively correlated with ci ( $R = -0.34$ ;  $p = 0.002$ ) and ct ( $R = -0.35$ ;  $p = 0.002$ ) at 12 month (Figure 2A, Figure 2B). Although MMF dose was positively correlated with renal function with borderline significance in univariate analysis, in multivariate analysis there was a significant positive association between greater average MMF dose and better eCr<sub>cl</sub> at 12 month post transplant ( $b = 0.21 \pm 0.1$ ;  $p = 0.04$ ) (Table 4).

*Factors affecting IF/TA:*

The average ci score increased from  $0.16 \pm 0.44$  to  $0.94 \pm 0.86$  between implantation and month 12 ( $p < 0.001$ ). Average progression of this and other chronic scores during 1 year post transplant is shown in Table 5. In univariate analysis  $\Delta ci$  ( $R = -0.37$ ;  $p = 0.001$ ) and  $\Delta ct$  ( $R = -0.38$ ;  $p = 0.001$ ) significantly negatively correlated with average MMF dose (Figure 3A and 3B, Table 6). There was lower progression of ci score in patients on steroid-free



1  
2  
3 immunosuppression ( $0.47 \pm 0.7$  vs.  $1.09 \pm 0.87$ ;  $p=0.002$ ) and in those who did not have  
4 DGF ( $0.62 \pm 0.74$  vs  $1.19 \pm 0.98$ ;  $p=0.02$ ). Acute cellular rejection, recipient and donor  
5 gender, recipient and donor age, HLA MM, deceased vs. living donor, as well as average  
6 concentration of tacrolimus had no significant effect on progression of chronic allograft  
7 scores. Factors that remained significantly associated with progression of ci score in  
8 multivariate analysis were ci0 score, donor age, average MMF dose, DGF and steroid-  
9 free immunosuppression (Table 7.). In multivariate analysis only ct0 score, average MMF  
10 dose and DGF remained independently associated with 12-month progression of ct score  
11 (Table 7.). Selected AE are shown in Table 8. There was no difference in AE (leucopenia  
12 and infections) with respect to average median MMF dose.  
13  
14  
15  
16  
17  
18  
19  
20  
21  
22  
23  
24  
25  
26  
27  
28

#### 29 Discussion:

30  
31  
32  
33  
34 The most important novel finding in our study is that greater average MMF exposure was  
35 strongly negatively correlated with IF/TA progression during first year after kidney  
36 transplantation. Patients on higher average dose of MMF during 1 year post  
37 transplantation had significantly lower progression of ci and ct scores. To our knowledge  
38 this is first study demonstrating that there is a dose-dependent protective effect of MMF  
39 on graft IF/TA. Lower progression of IF/TA could not be explained with lower  
40 concentration of CNI, because there was not correlation between tacrolimus  
41 concentration with IF/TA. Similarly, there was no correlation between average MMF  
42 dose and tacrolimus ( $R=-0.04$ ;  $p=0.79$ ) or cyclosporine concentration ( $R=-0.07$ ,  $p=0.79$ ).  
43  
44  
45  
46  
47  
48  
49  
50  
51  
52  
53  
54  
55  
56 In addition, higher average MMF dose was not associated with decreased incidence of  
57  
58  
59  
60

1  
2  
3 biopsy proven acute rejection, which suggests that antifibrotic properties of higher MMF  
4 dose was at least partly independent of its immunosuppressive effects. Higher MMF dose  
5 had only moderate effect on 1-year renal function, which is consistent with previous  
6 reports showing that transplanted kidneys undergo pathohistology changes without  
7 significant early change in kidney function.[17]

8  
9  
10  
11  
12  
13  
14  
15 In the present retrospective study we have confirmed that IF/TA progression occurs in  
16 first year after kidney transplantation. Several studies have shown that progression of  
17 IF/TA is correlated with type of immunosuppression.[18] In most transplant centers in  
18 the United States and Europe immunosuppression consists of induction with an anti-IL2R  
19 antibody or antithymocyte immunoglobulin and maintenance with a calcineurin inhibitor,  
20 MMF and steroids.[19] Studies have reported significant improvement in kidney function  
21 in patients on MMF with lower exposition to CNIs, esp. tacrolimus.[20] Recently, in the  
22 paper of Kamar *et al.* it has been reported that maintenance kidney transplant patients  
23 converted to a higher dose of the mycophenolate sodium (1440 mg daily) with lower  
24 tacrolimus concentration had borderline higher eCr<sub>cl</sub> on month 6 vs. those treated with  
25 lower dose of mycophenolate sodium, with usual tacrolimus concentration (eCr<sub>cl</sub> 49.1 ±  
26 11.1 vs. 44.7 ± 11.5 ml/min; p=0.07).[21] Although there was only borderline  
27 significance, increased mycophenolate dosing with lower tacrolimus concentration was  
28 safe with potential benefit on kidney function.

29  
30  
31  
32  
33  
34  
35  
36  
37  
38  
39  
40  
41  
42  
43  
44  
45  
46  
47  
48 Our study also corroborates recently published findings of a *post hoc* joint analysis of the  
49 Symphony, FDCC and OptiCept trials, where a lower tacrolimus level and a higher  
50 MMF dose were associated with significantly better kidney function at 1 year post  
51 transplant.[22] Shortcoming of these studies[17,18] is lack of protocol biopsies. The  
52  
53  
54  
55  
56  
57  
58  
59  
60

1  
2  
3 optimal MMF dosing in patients maintained on contemporary low-dose CNI is still  
4  
5 undetermined. However, some results of early MMF registration trials suggest that higher  
6  
7 MMF exposure might be beneficial; having in mind that there was no antibody induction  
8  
9 in these studies and that CNI was standard dose cyclosporine. Thus, in the Tri-continental  
10  
11 study, group treated with 3 g MMF compared with 2 g of MMF showed lower incidence  
12  
13 of biopsy proven acute rejection episodes (15.9% vs. 19.7%) within 6 month period  
14  
15 selected for the primary efficacy analysis. Similarly, serum creatinine level at 1 year was  
16  
17  $1.42 \pm 0.07$  mg/dL in the MMF 3 g group vs.  $1.64 \pm 0.07$  mg/dL in MMF 2 g group.[12]  
18  
19 In the European mycophenolate mofetil study same trends regarding higher MMF dose  
20  
21 were observed.[11] As mentioned before, in these studies there was no antibody  
22  
23 induction that could have allowed lower dose of cyclosporin with higher dose of MMF  
24  
25 and there were no protocol biopsies. In a more recent MYSS trial, there was no difference  
26  
27 in acute rejection rate and renal function between MMF and azathioprine in a  
28  
29 cyclosporine-based protocol.[19] However in that study only one MMF dose was  
30  
31 compared to azathioprine[23] and again there were no protocol biopsies.  
32  
33 Unfortunately adequate prospective MMF dose comparison studies in tacrolimus-based  
34  
35 protocols with antibody induction are missing. In the Symphony study it was reported  
36  
37 that patients on tacrolimus-MMF-prednisone maintenance immunosuppression after kidney  
38  
39 transplantation had better kidney function and graft survival with lower number of acute  
40  
41 rejection episodes. Patients in that group had highest MMF exposure.[24] Protocols with  
42  
43 even higher MMF exposure might allow additional CNI sparing, that would decrease side  
44  
45 effect of CNI (hypertension, diabetes, hyperlipidemia, neurotoxicity).[25]  
46  
47  
48  
49  
50  
51  
52  
53  
54  
55  
56  
57  
58  
59  
60

1  
2  
3 Clinical relevance of IF/TA without other concomitant pathology (i.e. recurrent disease  
4 and chronic antibody-mediated rejection) for prediction of graft deterioration and loss is  
5 controversial. In El-Zoghby et al. study there was attempt to identify specific causes of  
6  
7  
8  
9  
10 late kidney allograft failure. The authors found that transplant glomerulopathy was  
11  
12 responsible for 37 percent loss of functioning grafts, while graft loss due to IF/TA was  
13  
14 present in 31 percent of cases (with higher frequency in deceased-donor transplants).[26]  
15  
16  
17 At first glance, these results seem at odd with ours, where there were no signs of chronic  
18  
19 antibody-mediated rejection. An explanation for this discrepancy in the results of the two  
20  
21 studies is not completely clear, but the former study included high number of living  
22  
23 transplants (72.5 percent) with glomerulonephritis as primary disease and with follow-up  
24  
25 up to 10 years. Transplant glomerulopathy is more frequently seen late posttransplant,  
26  
27 generally with low incidence. Nevertheless, ours and El-Zoghby study, both  
28  
29 demonstrated that IF/TA even in absence of other pathology is associated with adverse  
30  
31 graft outcome. Another important study, the DeKaf study, tried to use various  
32  
33 histopathologic clusters to differentiate subgroups within diagnosis of IF/TA. They found  
34  
35 that cluster with more severe fibrosis plus inflammation and arterial lesions had the worst  
36  
37 prognosis.[27] Although incidence of acute rejection in our study did not vary with MMF  
38  
39 exposure, increased MMF exposure might suppress mild graft inflammation, below the  
40  
41 threshold for diagnosing acute rejection. This is subject of our ongoing investigation and  
42  
43 will be reported separately. An interesting finding of the present study was that early  
44  
45 steroid withdrawal was not associated with worse IF/TA. At first glance this is at odd  
46  
47 with the Astellas trial.[23] However, according to our protocol, patients with DGF were  
48  
49 not included in early steroid withdrawal and Astellas trial, which did not have protocol  
50  
51  
52  
53  
54  
55  
56  
57  
58  
59  
60

1  
2  
3 biopsies, reported increased IF/TA in early steroid withdrawal group based on indication  
4  
5 biopsies performed early posttransplant, thus more likely reflecting donor-derived  
6  
7 histology changes, rather than effect of steroid withdrawal.[28]  
8  
9

10  
11 In our study there was only borderline significance of positive association of 1-year eCr<sub>cl</sub>  
12  
13 with MMF in univariate analysis. This result is not very surprising since decreased renal  
14  
15 function is not a very sensitive marker of incipient IF/TA.  
16

17  
18 Mechanisms by which an average higher exposure to MMF was associated with slower  
19  
20 progression of IF/TA may be both immune and nonimmune. Because there was no  
21  
22 difference in incidence of acute rejection with respect to increased MMF exposure in our  
23  
24 study, we believe that there may be a significant contribution of nonimmune mechanisms  
25  
26 in retardation of IF/TA in patients with higher MMF. In line with this, in many  
27  
28 experimental models it has been shown that MMF has antiproliferative and antifibrotic  
29  
30 effect.[29-31] In the study of Jiang at al. using rat renal ischemia reperfusion injury, a  
31  
32 time- and dose-dependent correlation of higher MMF dose with better renal function and  
33  
34 lower interstitial fibrosis was demonstrated. Suggested potential mechanism was lower  
35  
36 expression of TGF- $\beta$ 1 and MCP-1 with lower macrophage infiltration.[32] In recent  
37  
38 clinical trials MMF was shown as a safe drug that could be a good candidate for  
39  
40 treatment of interstitial lung disease in systemic sclerosis.[33] Experimental model of  
41  
42 encapsulated peritoneal sclerosis in rats proved beneficial effect of MMF as an inhibitor  
43  
44 of neovascularisation.[34] Also, MMF monotherapy was associated with a positive effect  
45  
46 on hepatic fibrosis progression in HCV liver transplant recipients.[35]  
47  
48  
49  
50

51  
52  
53 Our study has several shortcomings, such as its retrospective aspect and relatively short  
54  
55 study period. Although study period was limited to 12 months post transplantation, a  
56  
57  
58  
59  
60

1  
2  
3 clear correlation of slower progression of IF/TA with higher average MMF dose  
4  
5 underlines potential benefit of these findings. As mentioned before, in current study we  
6  
7 did not analyze inflammation outside Banff acute rejection threshold in kidney biopsies  
8  
9 with respect to MMF dose. As inflammation in areas of IF/TA is an important predictor  
10  
11 of renal function and graft loss, this is subject of an ongoing work.  
12  
13

14  
15 In summary, higher MMF dose after kidney transplantation might slower progression of  
16  
17 IF/TA, which might lead to better long-term survival of transplanted kidney. Our study  
18  
19 serves as a platform for a prospective, randomized, long-term trial with different MMF  
20  
21 doses to evaluate benefit of higher MMF dose in renal transplant recipients.  
22  
23

24  
25 (NCT018600183).  
26  
27  
28  
29  
30  
31  
32  
33  
34  
35  
36  
37  
38  
39  
40  
41  
42  
43  
44  
45  
46  
47  
48  
49  
50  
51  
52  
53  
54  
55  
56  
57  
58  
59  
60

**Acknowledgments:**

This manuscript has not been published elsewhere, beside as a part of 2011 ASN Annual meeting abstract.

**Contributorship Statement**

Karlo Mihovilović – participated in research design, collecting data, analyzing data and wrote the paper, karlomihovilovic@gmail.com

Bojana Maksimović - participated in collecting and analyzing data, bmaximovic@gmail.com

Branislav Kocman - participated in collecting data, branislav.kocman@gmail.com

Denis Guštin - participated in collecting data, denis.gustin@zg.t-com.hr

Željko Vidas – participated in collecting data, zeljko.vidas1@zg.t-com.hr

Stela Bulimbašić - participated in collecting and analyzing data, stela.bulimbasic@gmail.com

Danica Galešić Ljubanović – participated in collecting and analyzing data,

danica.ljubanovic@zg.htnet.hr

Mirjana Sabljar Matovinović – participated in collecting data, mirjana.sabljar-

matovinovic@zg.t-com.hr

Mladen Knotek- proposed research design, analyzed data and participated in writing the paper,

mladen.knotek1@zg.t-com.hr

**Support and Financial Disclosure Declaration:**

Source of support: Grant by the Ministry of Science, Technology and Sports of the Republic of Croatia to Dr. Mladen Knotek.

Disclosures:

The authors of this manuscript have no conflicts of interest to disclose.

**Data Sharing Statement:** No additional data available.

**Abbreviations:**

IF/TA - interstitial fibrosis and tubular atrophy

MMF - mycophenolate mofetil

BK - polyoma virus BK

CNI - calcineurin inhibitors

DGF - delayed graft function

eCrCl - estimated creatine clearance

SPKT - simultaneous pancreas kidney transplantation

HLA MM – human leukocyte antigen mismatch

AE - adverse events

**Figure Legends**

Figure 1: Estimated creatinine clearance during first year posttransplant

Figure 2A: Correlation between average MMF dose and progression of ci score

Figure 2B: Correlation between average MMF dose and progression of ct score

Figure 3A: Estimated creatinine clearance by ci score

Figure 3B: Estimated creatinine clearance by ct score



## Reference List

- 1 Pascual M, Theruvath T, Kawai T et al. Strategies to improve long-term outcomes after renal transplantation. *N Engl J Med* 2002; 346:580-590.
- 2 Kuypers DR, Chapman JR, O'Connell PJ et al. Predictors of renal transplant histology at three months. *Transplantation* 1999; 67:1222-1230.
- 3 Matas AJ, Gillingham KJ, Payne WD et al. The impact of an acute rejection episode on long-term renal allograft survival (t1/2). *Transplantation* 1994;57:857-859.
- 4 Nankivell BJ, Borrows RJ, Fung CL et al. The natural history of chronic allograft nephropathy. *N Engl J Med* 2003; 349:2326-2333.
- 5 Birnbaum LM, Lipman M, Paraskevas S et al. Management of chronic allograft nephropathy: a systematic review. *Clin J Am Soc Nephrol* 2009; 4:860-865.
- 6 Frimat L, Cassuto-Viguiet E, Charpentier B et al. Impact of cyclosporine reduction with MMF: a randomized trial in chronic allograft dysfunction. The 'reference' study. *Am J Transplant* 2006; 6:2725-2734.
- 7 Ekberg H, Tedesco-Silva H, Demirbas A et al. Reduced exposure to calcineurin inhibitors in renal transplantation. *N Engl J Med* 2007; 357:2562-2575.
- 8 Azuma H, Binder J, Heemann U et al. Effects of RS61443 on functional and morphological changes in chronically rejecting rat kidney allografts. *Transplantation* 1995; 59:460-466.
- 9 Ojo AO, Meier-Kriesche HU, Hanson JA et al. Mycophenolate mofetil reduces late renal allograft loss independent of acute rejection. *Transplantation* 2000; 69:2405-2409.
- 10 The Tricontinental Mycophenolate Mofetil Renal Transplantation Study Group. A blinded, randomized clinical trial of mycophenolate mofetil for the prevention of acute rejection in cadaveric renal transplantation. *Transplantation* 1996; 61,722-729.
- 11 European Mycophenolate Mofetil Cooperative Study Group. Placebo controlled study of mycophenolate mofetil combined with cyclosporin and corticosteroids for prevention of acute rejection. *Lancet* 1995; 345, 1321-1325.
- 12 Djamali A, Vidyasagar A, Yagci G et al. Mycophenolic acid may delay allograft fibrosis by inhibiting transforming growth factor-beta1-induced activation of Nox-2 through the nuclear factor-kappaB pathway. *Transplantation* 2010;90:387-393.

- 1  
2  
3  
4  
5  
6  
7  
8  
9  
10  
11  
12  
13  
14  
15  
16  
17  
18  
19  
20  
21  
22  
23  
24  
25  
26  
27  
28  
29  
30  
31  
32  
33  
34  
35  
36  
37  
38  
39  
40  
41  
42  
43  
44  
45  
46  
47  
48  
49  
50  
51  
52  
53  
54  
55  
56  
57  
58  
59  
60
- 13 Dell'Oglio MP, Zaza G, Rossini M et al. The anti-fibrotic effect of mycophenolic acid-induced neutral endopeptidase. *J Am Soc Nephrol* 2010; 21:2157-2168.
  - 14 Solez K, Colvin RB, Racusen LC et al. Banff 07 classification of renal allograft pathology: updates and future directions. *Am J Transplant* 2008; 8:753-760.
  - 15 Racusen LC, Solez K, Colvin RB et al. The Banff 97 working classification of renal allograft pathology. *Kidney Int* 1999; 55:713-723.
  - 16 Roufosse CA, Shore I, Moss J et al. Peritubular capillary basement membrane multilayering on electron microscopy: a useful marker of early chronic antibody-mediated damage. *Transplantation* 2012; 94:269-274.
  - 17 Nankivell BJ, Borrows RJ, Fung CL et al. The natural history of chronic allograft nephropathy. *N Engl J Med* 2003; 349:2326-2333.
  - 18 Gelens MA, Steegh FM, van Hooff JP et al. Immunosuppressive Regimen and Interstitial Fibrosis and Tubules Atrophy at 12 Months Postrenal Transplant. *Clin J Am Soc Nephrol* 2012; 5:1010-1017.
  - 19 Available at:  
[http://srtr.transplant.hrsa.gov/annual\\_reports/2011/pdf/01\\_kidney\\_12.pdf](http://srtr.transplant.hrsa.gov/annual_reports/2011/pdf/01_kidney_12.pdf). 2013.
  - 20 Ekberg H, van GT, Kaplan B et al. Relationship of tacrolimus exposure and mycophenolate mofetil dose with renal function after renal transplantation. *Transplantation* 2011; 92:82-87.
  - 21 Kamar N, Rostaing L, Cassuto E et al. A multicenter, randomized trial of increased mycophenolic acid dose using enteric-coated mycophenolate sodium with reduced tacrolimus exposure in maintenance kidney transplant recipients. *Clin Nephrol* 2012 ;77:126-136.
  - 22 Ekberg H, van GT, Kaplan B et al. Relationship of tacrolimus exposure and mycophenolate mofetil dose with renal function after renal transplantation. *Transplantation* 2011; 92:82-87.
  - 23 Remuzzi G, Lesti M, Gotti E et al. Mycophenolate mofetil versus azathioprine for prevention of acute rejection in renal transplantation (MYSS): a randomised trial. *Lancet* 2004; 364:503-512.
  - 24 Lloberas N, Torras J, Cruzado JM et al. Influence of MRP2 on MPA pharmacokinetics in renal transplant recipients-results of the Pharmacogenomic Substudy within the Symphony Study. *Nephrol Dial Transplant* 2011; 26:3784-3793.
  - 25 Pascual M, Theruvath T, Kawai T et al. Strategies to improve long-term outcomes after renal transplantation. *N Engl J Med* 2002; 346:580-590.

- 1  
2  
3  
4  
5  
6  
7  
8  
9  
10  
11  
12  
13  
14  
15  
16  
17  
18  
19  
20  
21  
22  
23  
24  
25  
26  
27  
28  
29  
30  
31  
32  
33  
34  
35  
36  
37  
38  
39  
40  
41  
42  
43  
44  
45  
46  
47  
48  
49  
50  
51  
52  
53  
54  
55  
56  
57  
58  
59  
60
- 26 El-Zoghby ZM, Stegall MD, Lager DJ et al. Identifying specific causes of kidney allograft loss. *Am J Transplant* 2009;9:527-535.
- 27 Matas AJ, Leduc R, Rush D et al. Histopathologic clusters differentiate subgroups within the nonspecific diagnoses of CAN or CR: preliminary data from the DeKAF study. *Am J Transplant* 2010; 10:315-323.
- 28 Woodle ES, First MR, Pirsch J et al. A prospective, randomized, double-blind, placebo-controlled multicenter trial comparing early (7 day) corticosteroid cessation versus long-term, low-dose corticosteroid therapy. *Ann Surg*; 248: 564-577.
- 29 Luo L, Sun Z, Wu W et al. Mycophenolate mofetil and FK506 have different effects on kidney allograft fibrosis in rats that underwent chronic allograft nephropathy. *BMC Nephrol* 2012;13:53.
- 30 Jiang S, Tang Q, Rong R et al. Mycophenolate mofetil inhibits macrophage infiltration and kidney fibrosis in long-term ischemia-reperfusion injury. *Eur J Pharmacol* 2012; 688:56-61.
- 31 Dell'Oglio MP, Zaza G, Rossini M et al. The anti-fibrotic effect of mycophenolic acid-induced neutral endopeptidase. *J Am Soc Nephrol* 2010; 21:2157-2168.
- 32 Jiang S, Tang Q, Rong R et al. Mycophenolate mofetil inhibits macrophage infiltration and kidney fibrosis in long-term ischemia-reperfusion injury. *Eur J Pharmacol* 2012; 688:56-61.
- 33 Tzouveleakis A, Galanopoulos N, Bouros E, et al. Effect and safety of mycophenolate mofetil or sodium in systemic sclerosis-associated interstitial lung disease: a meta-analysis. *Pulm Med* 2012; 1-7.
- 34 Hur E, Bozkurt D, Timur O, et al. The effects of mycophenolate mofetil on encapsulated peritoneal sclerosis model in rats. *Clin Nephrol* 2012; 77:1-7.
- 35 Manzia TM, Angelico R, Toti L et al. Long-term, maintenance MMF monotherapy improves the fibrosis progression in liver transplant recipients with recurrent hepatitis C. *Transpl Int* 2011; 24:461-468.

Table 1. Baseline characteristics

|                                        |                                                                                                                                                               |               |
|----------------------------------------|---------------------------------------------------------------------------------------------------------------------------------------------------------------|---------------|
| <b>RECIPIENT CHARACTERISTICS</b>       | AGE (years)                                                                                                                                                   | 44.67 ± 12.03 |
|                                        | GENDER (f/m)                                                                                                                                                  | 25/54         |
|                                        | PRIMARY RENAL DISEASE<br>(diabetes mellitus,<br>polycystic kidney disease,<br>glomerulonephritis,<br>pyelonephritis/interstitial nephritis,<br>other/unknown) | 24/8/19/6/22  |
| <b>DONOR CHARACTERISTICS</b>           | DONOR SOURCE<br>(deceased/living)                                                                                                                             | 55/24         |
|                                        | AGE (years)                                                                                                                                                   | 43.89 ± 15.55 |
|                                        | GENDER (f/m)                                                                                                                                                  | 36/43         |
| <b>TRANSPLANTATION CHARACTERISTICS</b> | TRANSPLANTED ORGAN<br>(KIDNEY/SPKT)                                                                                                                           | 58/21         |
|                                        | INITIAL IMMUNOSUPPRESSION<br>(anti-IL2,TAC,MMF/anti-IL2,<br>CyA,MMF)                                                                                          | 53/26         |
|                                        | DELAYED GRAFT FUNCTION<br>(no/yes)                                                                                                                            | 53/26         |
|                                        | STEROID FREE (yes/no)                                                                                                                                         | 36/43         |
|                                        | HLA MM                                                                                                                                                        | 3.33 ± 1.51   |

Table 2. eCr<sub>cl</sub>, MMF dose and CNI concentration during first year post transplant

|                                       | Month posttransplant               |                                       |                                      |                                      |
|---------------------------------------|------------------------------------|---------------------------------------|--------------------------------------|--------------------------------------|
|                                       | 1                                  | 3                                     | 6                                    | 12                                   |
| eCr <sub>cl</sub> (ml/min)            |                                    | 56.98 ± 15.79                         | 58.94 ± 16.94                        | 61.47 ± 16.75                        |
| MMF dose (mg)                         | 2500 (750 – 4000)<br>2427 ± 643.17 | 2000 (750 – 4000)<br>2167.72 ± 733.49 | 2000 (1000-4000)<br>2188.29 ± 716.91 | 2000 (1000-4000)<br>2193.04 ± 642.95 |
| Tacrolimus conc.<br>(µg/L)<br>(n=53)  | 10.79 ± 4.16                       | 9.69 ± 3.00                           | 9.03 ± 5.52                          | 7.83 ± 2.45                          |
| Cyclosporin conc.<br>(µg/L)<br>(n=26) | 335.07 (274 – 413)                 | 231.05 (181-265)                      | 206 (170 – 257)                      | 131 (125 – 171)                      |

Table 3. Association of variables with eCr<sub>cl</sub> on 1 year

|                                  | Estimated creatinine clearance (ml/min) | p value |
|----------------------------------|-----------------------------------------|---------|
| Kidney vs. SPKT                  | 57.88 ± 15.47 vs. 71.38 ± 13.45         | 0.001   |
| DGF (yes vs. no)                 | 56.15 ± 17.55 vs. 64.08 ± 15.87         | 0.05    |
| Recipient gender (m vs. f)       | 59.83 ± 16.02 vs. 65 ± 18.07            | 0.2     |
| Donor gender (m vs. f)           | 63.87 ± 16.71 vs. 58.60 ± 16.58         | 0.17    |
| Donor source (D vs. L)           | 62.36 ± 17.85 vs. 59.43 ± 14.05         | 0.47    |
| Steroid-free (yes vs. no)        | 63.94 ± 17.73 vs. 59.39 ± 15.81         | 0.23    |
| Acute rejection (yes vs. no)     | 61.64 ± 16.59 vs. 61.39 ± 16.97         | 0.95    |
|                                  | R                                       | p value |
| Recipient age                    | -0.45                                   | <0.001  |
| Donor age                        | -0.46                                   | <0.001  |
| HLA MM                           | 0.07                                    | 0.52    |
| Average tacrolimus concentration | -0.02                                   | 0.9     |
| Average MMF dose                 | 0.18                                    | 0.1     |
| ci at 1 year post Tx             | -0.34                                   | 0.002   |
| ct at 1 year post Tx             | -0.35                                   | 0.002   |
| cv at 1 year post Tx             | -0.20                                   | 0.07    |

Table 4. Multiple regression analysis of factors associated with kidney function

|                  | Beta<br>( $\beta$ ) | St.Err.<br>$\beta$ | p value |
|------------------|---------------------|--------------------|---------|
| Tx (kidney)      | -0.17               | 0.13               | 0.19    |
| DGF (no)         | 0.04                | 0.1                | 0.71    |
| Recipient age    | -0.41               | 0.1                | <0.001  |
| Donor age        | -0.1                | 0.14               | 0.45    |
| ci at 12 months  | -0.18               | 0.11               | 0.09    |
| Average MMF dose | 0.21                | 0.1                | 0.04    |

Table 5. One-year progression of chronic allograft scores

| Banff score                  | N  | At transplantation | N  | 12 month    | p      |
|------------------------------|----|--------------------|----|-------------|--------|
| Interstitial fibrosis (ci)   | 79 | 0.16 ± 0.44        | 79 | 0.94 ± 0.85 | <0.001 |
| Tubular atrophy (ct)         | 79 | 0.24 ± 0.46        | 79 | 1.05 ± 0.77 | <0.001 |
| Chronic glomerulopathy (cg)  | 79 | 0                  | 79 | 0           |        |
| Mesangial matrix (mm)        | 79 | 0.01 ± 0.11        | 79 | 0.09 ± 0.36 | 0.09   |
| Fibrointimal thickening (cv) | 76 | 0.37 ± 0.83        | 78 | 0.29 ± 0.70 | 0.47   |
| Arteriolar hyalinosis (ah)   | 78 | 0.68 ± 1.04        | 79 | 0.79 ± 1.04 | 0.26   |



Table 6. Correlation of factors associated with progression of ci and ct scores

|                              | $\Delta$ ci                         |        | $\Delta$ ct                         |        |
|------------------------------|-------------------------------------|--------|-------------------------------------|--------|
|                              | mean $\pm$ SD                       | p      | mean $\pm$ SD                       | p      |
| Kidney vs. SPKT              | 0.86 $\pm$ 0.91 vs. 0.67 $\pm$ 0.73 | 0.51   | 0.85 $\pm$ 0.87 vs. 0.86 $\pm$ 0.65 | 0.74   |
| DGF (yes vs. no)             | 1.19 $\pm$ 0.98 vs. 0.62 $\pm$ 0.74 | 0.02   | 1.15 $\pm$ 0.92 vs. 0.69 $\pm$ 0.72 | 0.05   |
| Recipient gender (m vs. f)   | 0.83 $\pm$ 0.88 vs. 0.76 $\pm$ 0.83 | 0.78   | 0.91 $\pm$ 0.83 vs. 0.72 $\pm$ 0.79 | 0.35   |
| Donor gender (m vs. f)       | 0.91 $\pm$ 0.95 vs. 0.69 $\pm$ 0.75 | 0.43   | 0.88 $\pm$ 0.93 vs. 0.81 $\pm$ 0.67 | 0.96   |
| Donor source (D vs. L)       | 0.84 $\pm$ 0.88 vs. 0.75 $\pm$ 0.85 | 0.73   | 0.87 $\pm$ 0.82 vs. 0.79 $\pm$ 0.83 | 0.71   |
| Steroid free (yes vs. no)    | 1.09 $\pm$ 0.87 vs. 0.47 $\pm$ 0.74 | 0.002  | 1.07 $\pm$ 0.83 vs. 0.58 $\pm$ 0.73 | 0.01   |
| Acute rejection (yes vs. no) | 0.8 $\pm$ 0.89 vs. 0.83 $\pm$ 0.82  | 0.78   | 0.93 $\pm$ 0.84 vs. 0.67 $\pm$ 0.76 | 0.23   |
|                              | R                                   | p      | R                                   | p      |
| Recipient age                | -0.11                               | 0.33   | -0.11                               | 0.32   |
| Donor age                    | 0.17                                | 0.13   | 0.04                                | 0.73   |
| HLA MM                       | -0.09                               | 0.43   | -0.002                              | 0.99   |
| Average tacrolimus conc.     | -0.009                              | 0.95   | 0.003                               | 0.98   |
| Average MMF dose             | -0.37                               | <0.001 | -0.38                               | <0.001 |
| ci at implantation           | -0.32                               | 0.003  |                                     |        |
| ct at implantation           |                                     |        | -0.45                               | <0.001 |

Table 7. Multivariate general regression analysis for factors related to progression of ci and ct score

| $\Delta ci$        |                  |                   |        |
|--------------------|------------------|-------------------|--------|
|                    | Beta ( $\beta$ ) | Std. Err. $\beta$ | p      |
| ci0                | -0.43            | 0.09              | <0.001 |
| DGF (no)           | -0.22            | 0.11              | <0.05  |
| Average MMF dose   | -0.20            | 0.09              | <0.05  |
| Donor age          | 0.32             | 0.09              | <0.05  |
| Steroid free (yes) | -0.25            | 0.11              | 0.02   |
| $\Delta ct$        |                  |                   |        |
|                    | Beta ( $\beta$ ) | Std. Err. $\beta$ | p      |
| ct0                | -0.44            | 0.09              | <0.001 |
| Average MMF dose   | -0.29            | 0.1               | <0.05  |
| DGF (no)           | -0.29            | 0.1               | <0.05  |
| Steroid free (yes) | -0.09            | 0.11              | 0.39   |

Table 8. Adverse events with respect to 1 year average median MMF dose.

|                                                  | <b>MMF dose &lt; median</b> | <b>MMF dose &gt; median</b> | <b>p</b> |
|--------------------------------------------------|-----------------------------|-----------------------------|----------|
| Average number of infection episodes per patient | 1.16 ± 0.97                 | 1.23 ± 1.22                 | 0.88     |
| Mean time to first infection (days)              | 157±138                     | 175±143                     | 0.76     |
| Proportion of patients with leucopenia           | 6 /31                       | 7 /48                       | 0.58     |

Effect of Mycophenolate Mofetil on Progression of Interstitial Fibrosis and Tubular  
Atrophy after Kidney Transplantation - [A Retrospective Study](#)

Karlo Mihovilović<sup>1</sup>, Bojana Maksimović<sup>1</sup>, Branislav Kocman<sup>2</sup>, Denis Guštin<sup>3</sup>, Željko Vidas<sup>4</sup>,  
Stela Bulimbašić<sup>6</sup>, Danica Galešić Ljubanović<sup>5,6</sup>, Mirjana Sabljar Matovinović<sup>1</sup>, Mladen  
Knotek<sup>1,5</sup>

Clinical Hospital Merkur: <sup>1</sup>Department of Medicine, Renal Division, <sup>2</sup>Department of Surgery,  
<sup>3</sup>Department of Anaesthesiology, <sup>4</sup>Department of Urology; <sup>5</sup>University of Zagreb School of  
Medicine, Zagreb, Croatia, Clinical Hospital Dubrava: <sup>6</sup>Department of Pathology

**Keywords:** interstitial fibrosis, tubular atrophy, kidney function, myophenolate mofetil

Word count: Abstract-238

Manuscript- 3049

**Number of tables:** 8

**Number of figures:** 3

**Corresponding author:** Dr. Mladen Knotek

Department of Medicine, Renal Division

Clinical Hospital Merkur

Zajceva 19

10000 Zagreb

Croatia

e-mail: mladen.knotek1@zg.t-com.hr (this e-mail address can be published)

phone: +38512431123, fax: +38512431123

1  
2  
3 Karlo Mihovilović – participated in research design, collecting data, analyzing data and wrote the  
4 paper, karlomihovilovic@gmail.com  
5

6  
7 Bojana Maksimović - participated in collecting and analyzing data, bmaximovic@gmail.com  
8

9  
10 Branislav Kocman - participated in collecting data, branislav.kocman@gmail.com  
11

12 Denis Guštin - participated in collecting data, denis.gustin@zg.t-com.hr  
13

14 Željko Vidas – participated in collecting data, zeljko.vidas1@zg.t-com.hr  
15

16 Stela Bulimbašić - participated in collecting and analyzing data, stela.bulimbasic@gmail.com  
17

18 Danica Galešić Ljubanović – participated in collecting and analyzing data,  
19 danica.ljubanovic@zg.htnet.hr  
20

21  
22 Mirjana Sabljar Matovinović – participated in collecting data, mirjana.sabljar-  
23 matovinovic@zg.t-com.hr  
24

25  
26 Mladen Knotek- proposed research design, analyzed data and participated in writing the paper,  
27 mladen.knotek1@zg.t-com.hr  
28  
29  
30  
31  
32

33  
34 Support and Financial Disclosure Declaration:  
35

36 Source of support: Grant by the Ministry of Science, Technology and Sports of the  
37 Republic of Croatia to Dr. Mladen Knotek.  
38

39  
40 Disclosures:  
41

42  
43 The authors of this manuscript have no conflicts of interest to disclose.  
44  
45  
46  
47  
48  
49  
50  
51  
52  
53  
54  
55  
56  
57  
58  
59  
60

1  
2  
3 Abbreviations:  
4

5 IF/TA - interstitial fibrosis and tubular atrophy  
6

7  
8 MMF - mycophenolate mofetil  
9

10 BK - polyoma virus BK  
11

12 CNI - calcineurin inhibitors  
13

14 DGF - delayed graft function  
15

16 eCrCl - estimated creatine clearance  
17

18 SPKT - simultaneous pancreas kidney transplantation  
19

20 HLA MM – human leukocyte antigen mismatch  
21

22 [AE - adverse events](#)  
23  
24  
25  
26  
27  
28  
29  
30  
31  
32  
33  
34  
35  
36  
37  
38  
39  
40  
41  
42  
43  
44  
45  
46  
47  
48  
49  
50  
51  
52  
53  
54  
55  
56  
57  
58  
59  
60

## ABSTRACT:

**Objectives** - Chronic transplant dysfunction after kidney transplantation is major reason of kidney graft loss and is caused by immunological and non-immunological factors.

There is evidence that mycophenolate mofetil (MMF) may exert a positive effect on renal damage in addition to immunosuppression, by its direct antifibrotic properties. The aim of our study was to retrospectively investigate role of MMF dose on progression of chronic allograft dysfunction and IF/TA.

**Setting** - Retrospective, cohort study.

**Participants** - Kidney transplant patients in tertiary care institution. This is a retrospective cohort study that included 79 patients with kidney and kidney-pancreas transplantation. Immunosuppression consisted of anti-IL2 antibody induction, MMF, a calcineurin inhibitor  $\pm$  steroids.

**Primary outcome measures** - An association of average MMF dose over 1 year post transplant with progression of interstitial fibrosis ( $\Delta$ ci), tubular atrophy ( $\Delta$ ct) and estimated creatinine clearance (eCrcl) at 1 year post transplant was evaluated using univariate and multivariate analyses.

**Results** - Higher average MMF dose was significantly independently associated with better eCrcl at 1 year post transplant ( $b=0.21 \pm 0.1$ ,  $p=0.04$ ). In multiple regression analysis lower  $\Delta$ ci ( $b=-0.2 \pm 0.09$ ,  $p=0.05$ ) and  $\Delta$ ct ( $b=-0.29 \pm 0.1$ ,  $p=0.02$ ) were independently associated with greater average MMF dose. There was no correlation between average MMF dose and incidence of acute rejection ( $p=0.68$ ).

1  
2  
3 **Conclusions** - Higher average MMF dose over 1 year is associated with better renal  
4 function and slower progression of IF/TA, at least partly independent of its  
5  
6 immunosuppressive effects.  
7  
8  
9

### 10 11 12 **Strengths and limitations of this study**

13  
14 Important novel finding in our study is that greater average MMF exposure was strongly  
15 negatively correlated with IF/TA progression during first year after kidney  
16 transplantation. Patients on higher average dose of MMF (up to 4 g daily) during 1 year  
17 post transplantation had significantly lower progression of graft interstitial fibrosis and  
18 tubular atrophy. This is important finding, because of predictive value of graft IF/TA and  
19 should translate into better long-term graft survival. Our study has several shortcomings,  
20 such as its retrospective aspect and relatively short study period. As it was not aim of the  
21 study, we did not report side effects associated with different dosage of MMF.  
22  
23  
24  
25  
26  
27  
28  
29  
30  
31  
32  
33  
34  
35  
36  
37  
38  
39  
40  
41  
42  
43  
44  
45  
46  
47  
48  
49  
50  
51  
52  
53  
54  
55  
56  
57  
58  
59  
60



1  
2  
3  
4  
5  
6  
7  
8 INTRODUCTION:  
9

10  
11  
12 Kidney transplantation significantly improves patient survival and quality of life  
13 comparing to dialysis. While significant improvements have been made in the treatment  
14 of acute rejection and short survival of transplanted kidney, there has not been major  
15 improvement in the long-term survival of transplanted kidney.[1] Chronic transplant  
16 dysfunction after kidney transplantation is major cause of kidney graft loss and is evoked  
17 by immunological and non-immunological factors.[2, 3] Histology changes that  
18 determine chronic transplant dysfunction are interstitial fibrosis and tubular atrophy  
19 (IF/TA), arteriosclerosis, arteriolar hyalinosis, glomerulopathy and mesangial matrix  
20 expansion.[4] IF/TA is the major pathohistology finding that can be verified on graft  
21 biopsies after kidney transplantation and is a predictor of long-term allograft function.[4]  
22  
23 Clinical factors that affect progression of IF/TA are: recipient age, HLA mismatch,  
24 episodes of severe acute rejection, chronic rejection (esp. antibody-mediated), use of  
25 calcineurin inhibitors and BK nephropathy. Avoidance of CNI toxicity is considered as  
26 an important step to slow progression of IF/TA.[4-7] Mycophenolate mofetil (MMF) may  
27 help lowering CNI toxicity, by allowing lower CNI exposure.[7]  
28  
29 MMF reduces the risk of acute allograft rejection, without nephrotoxic side effects and is  
30 ideal candidate for long-term calcineurin drug reduction treatment strategies.[7]  
31  
32 Retrospective studies of renal recipients who were treated with mycophenolate mofetil  
33 comparing azathioprin showed that MMF treated patients had significantly less chronic  
34  
35  
36  
37  
38  
39  
40  
41  
42  
43  
44  
45  
46  
47  
48  
49  
50  
51  
52  
53  
54  
55  
56  
57  
58  
59  
60

1  
2  
3 allograft dysfunction.[8, 9] Besides being associated with lower acute rejection rates as  
4 compared to azathioprin,[10, 11] evidence from animal and human studies suggests that  
5  
6 MMF may also exert a direct antifibrotic properties due to its antiproliferative action on  
7  
8 nonimmune cells, including renal tubular cells and vascular smooth muscle cells.[12, 13]  
9  
10  
11  
12 The aim of our study was to investigate role of mycophenolate mofetil dose on  
13  
14 progression of IF/TA in kidney transplant recipients.  
15  
16  
17  
18  
19

## 20 PATIENTS AND METHODS:

### 21 *Patients:*

22  
23  
24  
25  
26  
27 This is a retrospective study conducted at Clinical Hospital “Mercur”. This study  
28  
29 represents a part of the posttransplant immune monitoring at the Mercur hospital,  
30  
31 approved by the Hospital Ethics Committee. Patients gave there informed written consent for  
32  
33 anonymized transplant data collection for research purposes. The study included 79 patients  
34  
35 with kidney and kidney-pancreas transplantation, transplanted between 2003 and 2011.  
36  
37 Eligible patients had to have protocol kidney biopsy at the time of implantation and 12  
38  
39 months after transplantation. Exclusion criteria have been: dual kidney transplantation,  
40  
41 kidney-liver transplantation, use of antithymocyte immunoglobulin, BK nephropathy and  
42  
43 recurrence of glomerulonephritis after transplantation.  
44  
45  
46  
47  
48  
49  
50  
51  
52  
53  
54  
55  
56  
57  
58  
59  
60

1  
2  
3  
4  
5  
6  
7  
8  
9  
10  
11  
12  
13  
14  
15  
16  
17  
18  
19  
20  
21  
22  
23  
24  
25  
26  
27  
28  
29  
30  
31  
32  
33  
34  
35  
36  
37  
38  
39  
40  
41  
42  
43  
44  
45  
46  
47  
48  
49  
50  
51  
52  
53  
54  
55  
56  
57  
58  
59  
60

*Immunosuppression:*

Induction immunosuppression consisted of an anti-IL2 antibody (daclizumab or basiliximab), calcineurin inhibitor (tacrolimus or cyclosporine), MMF and methylprednisolone. Maintenance immunosuppression consisted of a calcineurin inhibitor (tacrolimus or cyclosporine), MMF ± steroids. Target cyclosporine trough concentrations were 250-350 during first month posttransplant, 200-300 during second to 6<sup>th</sup> month and 100-150 µg/L thereafter. Target tacrolimus trough levels were 10-12 during first month, 8-10 during second to 6<sup>th</sup> month and 5-8 µg/L thereafter. Mycophenolic acid target trough concentration was aimed to be higher than 7.2 µmol/L with tacrolimus and higher than 5 µmol/L with cyclosporine use.

Daclizumab was administered at day 0: 2mg/kg i.v. before opening of vascular anastomosis and at day 14: 2mg/kg i.v.. Basiliximab was administered at day 0: 20 mg i.v. before opening of vascular anastomosis and at day 4: 20 mg i.v..

Steroids have been dosed as follows: day 0: intraoperatively 500 mg of methylprednisolone, day 1: 250 mg, day 2: 125mg, day 3: 80 mg and day 4: 40 mg. In patients with early steroid withdrawal steroids have been withdrawn at day 5 after transplantation. In patients maintained on steroids, nadir dose of prednisone was 5 mg/d, achieved by 6 months. The criteria for early elimination of steroids were low immunological risk of the recipient (absence of, or low degree of HLA sensitization, i.e. PRA <10%) and good immediate renal function, as well as absence of an episode of acute rejection within 5 days after the transplantation. Steroids have been reintroduced in patients who suffered acute rejection episode.

1  
2  
3 As prophylaxis for viral (HSV, CMV), fungal (Candida spp.) urinary and P. jiroveci  
4  
5 infections, low-dose fluconazole (for one year), valganciclovir (universally for three  
6  
7 months) and sulfomethoxazol and trimethoprim (for one year) was used.  
8  
9  
10

11  
12  
13  
14  
15  
16  
17  
18  
19  
20 *Renal allograft biopsies:*

21  
22 Protocol kidney biopsies were done at implantation, 1, 3, 6 and 12 months after  
23  
24 transplantation. For cause biopsies were done in case of unexplained deterioration of  
25  
26 renal function, or once weekly in patients with DGF. All rejection episodes were  
27  
28 histologically confirmed. Histopathological analysis was performed by either of two  
29  
30 pathologists who were blinded for immunosuppression. Acute rejections and chronic  
31  
32 allograft scores have been analyzed using Banff 97 classification and its updates.[14, 15]  
33  
34

35  
36 All protocol and indication biopsies were analyzed by light microscopy, by  
37  
38 immunofluorescence for C4d, and if indicated by immunohistochemistry for BK virus.  
39  
40 Biopsies at 1 year post transplant have been also analyzed by electron microscopy for  
41  
42 signs of chronic antibody-mediated rejection (transplant glomerulopathy, peritubular  
43  
44 capillary basement membrane multilayering).[16]  
45  
46  
47  
48  
49

50  
51 *Clinical outcome parameters:*

52  
53 Progression of chronic allograft scores during 1 year posttransplant was calculated by  
54  
55 subtracting implantation chronic scores from chronic allograft scores 12 months  
56  
57  
58  
59  
60

1  
2  
3 posttransplant: interstitial fibrosis ( $\Delta ci$ ), tubular atrophy ( $\Delta ct$ ), glomerulosclerosis ( $\Delta cg$ ),  
4  
5 mesangial matrix increase ( $\Delta mm$ ), vasculopathy ( $\Delta cv$ ) and arteriolar hyalinosis ( $\Delta ah$ ).  
6  
7

8 Estimated creatinine clearance ( $eCr_{cl}$ ) at 3, 6 and 12 months posttransplant was calculated  
9  
10 using Cockcroft-Gault formula. Acute rejections with Banff grade IA and IB were treated  
11  
12 with three 500 mg methylprednisolone pulses. In case of acute rejection grade IIA or  
13  
14 greater, patients have been treated with antithymocyte globulin. Antibody-mediated  
15  
16 rejections were treated with steroid pulse and plasmapheresis.  
17  
18

19  
20 Average dose of MMF during 1 year posttransplant was calculated from MMF dose at  
21  
22 month 1, 3, 6 and 12.  
23

24 Adverse effects analysed were clinically significant leucopenia, defined as white blood  
25  
26 cell count less than 3000/ml, time to first symptomatic infection and number of  
27  
28 symptomatic infection episodes per patient during first post transplant year.  
29  
30  
31

32  
33  
34 *Statistical analysis:*  
35

36 Numerical data are presented as mean  $\pm$  SD or median with range in case of not normal  
37  
38 distribution. Normality of distribution has been tested with Kolmogorov-Smirnov test.  
39  
40 Correlation between two continuous variables has been tested using Spearman  
41  
42 nonparametric correlation. Difference between two groups in continuous variables has  
43  
44 been tested with student t-test or with Mann–Whitney test in non-normally distributed  
45  
46 variables. The significance of the progression in chronic scores was analyzed using  
47  
48 Wilcoxon Matched Pairs test. Univariate and multiple linear regression analysis were  
49  
50 performed to determine predictive factors for progression of chronic allograft scores and  
51  
52 kidney function at 12 months after transplantation. All variables that were associated with  
53  
54  
55  
56  
57  
58  
59  
60

1  
2  
3  
4  
5  
6  
7  
8  
9  
10  
11  
12  
13  
14  
15  
16  
17  
18  
19  
20  
21  
22  
23  
24  
25  
26  
27  
28  
29  
30  
31  
32  
33  
34  
35  
36  
37  
38  
39  
40  
41  
42  
43  
44  
45  
46  
47  
48  
49  
50  
51  
52  
53  
54  
55  
56  
57  
58  
59  
60

respective outcome in bivariate analysis (at  $p \leq 0.1$ ) were included in multivariate analysis. Because of colinearity between ci and ct score, only one score was included in each multivariate analysis. Statistical significance was considered at  $p < 0.05$ . All statistical analyses were performed using Statistica 10 (StatSoft, Tulsa, OK, USA).

## RESULTS:

### *Patient and transplant characteristics:*

Patient characteristics are shown in Table 1. Recipients were a mean of  $44.67 \pm 12.03$  years old at the time of transplantation, 68 percent of them were male and all were Caucasians. 33 percent of recipients had DGF after transplantation. Donors were a mean of  $43.89 \pm 15.55$  years old and 54 percent of them were male. Number of living donor transplantations was 24 (30 percent). Average daily MMF dose during 1 year posttransplant was  $2244 \pm 585$  mg (1062 – 4000) (Table 25). As expected, there was no correlation of MMF dose with MMF trough concentration ( $R = -0.13$ ;  $p = 0.28$ ). Also, there was no correlation between MMF dose with tacrolimus concentration ( $R = -0.04$ ;  $p = 0.79$ ). Early steroid withdrawal was done in 46 percent of patients after transplantation. Incidence of subclinical and clinical acute rejections greater than borderline was 30 percent in first year. There was no correlation between average MMF dose and incidence of acute rejection ( $p = 0.68$ ).

### *Factors associating with eCr<sub>cl</sub>:*

Kidney function increased during 1st year post transplant. eCr<sub>cl</sub> at month 3 was  $56.98 \pm 15.78$  ml/min, at 6 month  $58.94 \pm 16.94$  ml/min and at 12 month  $61.47 \pm 16.75$  ml/min ( $p < 0.001$ ; 12 months vs. 3 months) (Figure 1.) eCr<sub>cl</sub> at 1 year post transplant was greater in SPKT recipients ( $71.38 \pm 13.45$  ml/min vs.  $57.88 \pm 16.47$  ml/min;  $p = 0.001$ ) and in patients who did not have DGF ( $64.08 \pm 15.87$  ml/min vs.  $56.15 \pm 17.55$  ml/min;  $p = 0.05$ ). Donor age ( $R = -0.46$ ;  $p < 0.001$ ) and recipient age ( $R = -0.46$ ;  $p < 0.001$ ) negatively correlated with eCr<sub>cl</sub> at 1 year post transplant, while there was no correlation of renal function with donor and recipient gender, type of donation (deceased vs. living), HLA MM, average CNI concentration, steroid-free regimen of immunosuppression, or history of acute rejection (Table 36). In univariate analysis allograft function at 12 month post Tx was also negatively correlated with ci ( $R = -0.34$ ;  $p = 0.002$ ) and ct ( $R = -0.35$ ;  $p = 0.002$ ) at 12 month (Figure 212A, Figure 212B). Although MMF dose was positively correlated with renal function with borderline significance in univariate analysis, in multivariate analysis there was a significant positive association between greater average MMF dose and better eCr<sub>cl</sub> at 12 month post transplant ( $b = 0.21 \pm 0.1$ ;  $p = 0.04$ ) (Table 42).

### *Factors affecting IF/TA:*

The average ci score increased from  $0.16 \pm 0.44$  to  $0.94 \pm 0.86$  between implantation and month 12 ( $p < 0.001$ ). Average progression of this and other chronic scores during 1 year post transplant is shown in ~~suppl. data~~ (Table 57). In univariate analysis  $\Delta ci$  ( $R = -0.37$ ;  $p = 0.001$ ) and  $\Delta ct$  ( $R = -0.38$ ;  $p = 0.001$ ) significantly negatively correlated with average MMF dose (Figure 323A and 323B, Table 63). There was lower progression of ci score

1  
2  
3 in patients on steroid-free immunosuppression ( $0.47 \pm 0.7$  vs.  $1.09 \pm 0.87$ ;  $p=0.002$ ) and  
4  
5 in those who did not have DGF ( $0.62 \pm 0.74$  vs  $1.19 \pm 0.98$ ;  $p=0.02$ ). Acute cellular  
6  
7 rejection, recipient and donor gender, recipient and donor age, HLA MM, deceased vs.  
8  
9 living donor, as well as average concentration of tacrolimus had no significant effect on  
10  
11 progression of chronic allograft scores. Factors that remained significantly associated  
12  
13 with progression of ci score in multivariate analysis were ci0 score, donor age, average  
14  
15 MMF dose, DGF and steroid-free immunosuppression (Table 74.). In multivariate  
16  
17 analysis only ct0 score, average MMF dose and DGF remained independently associated  
18  
19 with 12-month progression of ct score (Table 74.). Selected AE are shown in Table 8.  
20  
21 There was no difference in AE (leucopenia and infections) with respect to average  
22  
23 median MMF dose.  
24  
25  
26  
27  
28  
29

### 30 31 Discussion:

32  
33  
34  
35  
36 The most important novel finding in our study is that greater average MMF exposure was  
37  
38 strongly negatively correlated with IF/TA progression during first year after kidney  
39  
40 transplantation. Patients on higher average dose of MMF during 1 year post  
41  
42 transplantation had significantly lower progression of ci and ct scores. To our knowledge  
43  
44 this is first study demonstrating that there is a dose-dependent protective effect of MMF  
45  
46 on graft IF/TA. Lower progression of IF/TA could not be explained with lower  
47  
48 concentration of CNI, because there was not correlation between tacrolimus  
49  
50 concentration with IF/TA. Similarly, there was no correlation between average MMF  
51  
52 dose and tacrolimus ( $R=-0.04$ ;  $p=0.79$ ) or cyclosporine concentration ( $R=-0.07$ ,  $p=0.79$ ).  
53  
54  
55  
56  
57  
58  
59  
60



1  
2  
3 In addition, higher average MMF dose was not associated with decreased incidence of  
4 biopsy proven acute rejection, which suggests that antifibrotic properties of higher MMF  
5 dose was at least partly independent of its immunosuppressive effects. Higher MMF dose  
6 had only moderate effect on 1-year renal function, which is consistent with previous  
7 reports showing that transplanted kidneys undergo pathohistology changes without  
8 significant early change in kidney function.[17]

9  
10 In the present retrospective study we have confirmed that IF/TA progression occurs in  
11 first year after kidney transplantation. Several studies have shown that progression of  
12 IF/TA is correlated with type of immunosuppression.[18] In most transplant centers in  
13 the United States and Europe immunosuppression consists of induction with an anti-IL2R  
14 antibody or antithymocyte immunoglobulin and maintenance with a calcineurin inhibitor,  
15 MMF and steroids.[19] Studies have reported significant improvement in kidney function  
16 in patients on MMF with lower exposition to CNIs, esp. tacrolimus.[20] Recently, in the  
17 paper of Kamar *et al.* it has been reported that maintenance kidney transplant patients  
18 converted to a higher dose of the mycophenolate sodium (1440 mg daily) with lower  
19 tacrolimus concentration had borderline higher eCr<sub>cl</sub> on month 6 vs. those treated with  
20 lower dose of mycophenolate sodium, with usual tacrolimus concentration (eCr<sub>cl</sub> 49.1 ±  
21 11.1 vs. 44.7 ± 11.5 ml/min; p=0.07).[21] Although there was only borderline  
22 significance, increased mycophenolate dosing with lower tacrolimus concentration was  
23 safe with potential benefit on kidney function.

24  
25 Our study also corroborates recently published findings of a *post hoc* joint analysis of the  
26 Symphony, FDCC and OptiCept trials, where a a lower tacrolimus level and a higher  
27 MMF dose were associated with significantly better kidney function at 1 year post  
28  
29  
30  
31  
32  
33  
34  
35  
36  
37  
38  
39  
40  
41  
42  
43  
44  
45  
46  
47  
48  
49  
50  
51  
52  
53  
54  
55  
56  
57  
58  
59  
60

1  
2  
3 transplant.[22] Shortcoming of these studies[17,18] is lack of protocol biopsies. The  
4  
5 optimal MMF dosing in patients maintained on contemporary low-dose CNI is still  
6  
7 undetermined. However, some results of early MMF registration trials suggest that higher  
8  
9 MMF exposure might be beneficial; having in mind that there was no antibody induction  
10  
11 in these studies and that CNI was standard dose cyclosporine. Thus, in the Tri-continental  
12  
13 study, group treated with 3 g MMF compared with 2 g of MMF showed lower incidence  
14  
15 of biopsy proven acute rejection episodes (15.9% vs. 19.7%) within 6 month period  
16  
17 selected for the primary efficacy analysis. Similarly, serum creatinine level at 1 year was  
18  
19  $1.42 \pm 0.07$  mg/dL in the MMF 3 g group vs.  $1.64 \pm 0.07$  mg/dL in MMF 2 g group.[12]  
20  
21 In the European mycophenolate mofetil study same trends regarding higher MMF dose  
22  
23 were observed.[11] As mentioned before, in these studies there was no antibody  
24  
25 induction that could have allowed lower dose of cyclosporin with higher dose of MMF  
26  
27 and there were no protocol biopsies. In a more recent MYSS trial, there was no difference  
28  
29 in acute rejection rate and renal function between MMF and azathioprine in a  
30  
31 cyclosporine-based protocol.[19] However in that study only one MMF dose was  
32  
33 compared to azathioprine[23] and again there were no protocol biopsies.  
34  
35 Unfortunately adequate prospective MMF dose comparison studies in tacrolimus-based  
36  
37 protocols with antibody induction are missing. In the Symphony study it was reported  
38  
39 that patients on tacrolimus-MMF-prednisone maintenance immunosuppression after kidney  
40  
41 transplantation had better kidney function and graft survival with lower number of acute  
42  
43 rejection episodes. Patients in that group had highest MMF exposure.[24] Protocols with  
44  
45 even higher MMF exposure might allow additional CNI sparing, that would decrease side  
46  
47 effect of CNI (hypertension, diabetes, hyperlipidemia, neurotoxicity).[25]  
48  
49  
50  
51  
52  
53  
54  
55  
56  
57  
58  
59  
60

1  
2  
3 Clinical relevance of IF/TA without other concomitant pathology (i.e. recurrent disease  
4 and chronic antibody-mediated rejection) for prediction of graft deterioration and loss is  
5 controversial. In El-Zoghby et al. study there was attempt to identify specific causes of  
6 late kidney allograft failure. The authors found that transplant glomerulopathy was  
7 responsible for 37 percent loss of functioning grafts, while graft loss due to IF/TA was  
8 present in 31 percent of cases (with higher frequency in deceased-donor transplants).[26]

9  
10  
11  
12  
13  
14  
15  
16  
17 At first glance, these results seem at odd with ours, where there were no signs of chronic  
18 antibody-mediated rejection. An explanation for this discrepancy in the results of the two  
19 studies is not completely clear, but the former study included high number of living  
20 transplants (72.5 percent) with glomerulonephritis as primary disease and with follow-up  
21 up to 10 years. Transplant glomerulopathy is more frequently seen late posttransplant,  
22 generally with low incidence. Nevertheless, ours and El-Zoghby study, both  
23 demonstrated that IF/TA even in absence of other pathology is associated with adverse  
24 graft outcome. Another important study, the DeKaf study, tried to use various  
25 histopathologic clusters to differentiate subgroups within diagnosis of IF/TA. They found  
26 that cluster with more severe fibrosis plus inflammation and arterial lesions had the worst  
27 prognosis.[27] Although incidence of acute rejection in our study did not vary with MMF  
28 exposure, increased MMF exposure might suppress mild graft inflammation, below the  
29 threshold for diagnosing acute rejection. This is subject of our ongoing investigation and  
30 will be reported separately. An interesting finding of the present study was that early  
31 steroid withdrawal was not associated with worse IF/TA. At first glance this is at odd  
32 with the Astellas trial.[23] However, according to our protocol, patients with DGF were  
33 not included in early steroid withdrawal and Astellas trial, which did not have protocol

1  
2  
3 biopsies, reported increased IF/TA in early steroid withdrawal group based on indication  
4  
5 biopsies performed early posttransplant, thus more likely reflecting donor-derived  
6  
7  
8 histology changes, rather than effect of steroid withdrawal.[28]  
9

10  
11 In our study there was only borderline significance of positive association of 1-year eCr<sub>cl</sub>  
12  
13 with MMF in univariate analysis. This result is not very surprising since decreased renal  
14  
15 function is not a very sensitive marker of incipient IF/TA.  
16

17  
18 Mechanisms by which an average higher exposure to MMF was associated with slower  
19  
20 progression of IF/TA may be both immune and nonimmune. Because there was no  
21  
22 difference in incidence of acute rejection with respect to increased MMF exposure in our  
23  
24 study, we believe that there may be a significant contribution of nonimmune mechanisms  
25  
26 in retardation of IF/TA in patients with higher MMF. In line with this, in many  
27  
28 experimental models it has been shown that MMF has antiproliferative and antifibrotic  
29  
30 effect.[29-31] In the study of Jiang at al. using rat renal ischemia reperfusion injury, a  
31  
32 time- and dose-dependent correlation of higher MMF dose with better renal function and  
33  
34 lower interstitial fibrosis was demonstrated. Suggested potential mechanism was lower  
35  
36 expression of TGF- $\beta$ 1 and MCP-1 with lower macrophage infiltration.[32] In recent  
37  
38 clinical trials MMF was shown as a safe drug that could be a good candidate for  
39  
40 treatment of interstitial lung disease in systemic sclerosis.[33] Experimental model of  
41  
42 encapsulated peritoneal sclerosis in rats proved beneficial effect of MMF as an inhibitor  
43  
44 of neovascularisation.[34] Also, MMF monotherapy was associated with a positive effect  
45  
46 on hepatic fibrosis progression in HCV liver transplant recipients.[35]  
47  
48  
49  
50

51  
52 Our study has several shortcomings, such as its retrospective aspect and relatively short  
53  
54 study period. Although study period was limited to 12 months post transplantation, a  
55  
56  
57  
58  
59  
60

1  
2  
3 clear correlation of slower progression of IF/TA with higher average MMF dose  
4  
5 underlines potential benefit of these findings. As mentioned before, in current study we  
6  
7 did not analyze inflammation outside Banff acute rejection threshold in kidney biopsies  
8  
9 with respect to MMF dose. As inflammation in areas of IF/TA is an important predictor  
10  
11 of renal function and graft loss, this is subject of an ongoing work.  
12  
13

14  
15 In summary, higher MMF dose after kidney transplantation might slow progression of  
16  
17 IF/TA, which might lead to better long-term survival of transplanted kidney. Our study

18  
19 may serve as a platform for a prospective, randomized, long-term trial with different  
20  
21 MMF doses to evaluate benefit of higher MMF dose in renal transplant recipients  
22  
23 [\(NCT018600183\)](#).  
24  
25  
26  
27

#### 28 29 Acknowledgments:

30  
31 This manuscript has not been published elsewhere, beside as a part of 2011 ASN Annual  
32  
33 meeting abstract.  
34  
35  
36  
37  
38

39 [Figure 1: Estimated creatinine clearance during first year posttransplant](#)

40  
41 [Figure 2A: Correlation between average MMF dose and progression of ci score](#)

42  
43 [Figure 2B: Correlation between average MMF dose and progression of ct score](#)

44  
45 [Figure 3A: Estimated creatinine clearance by ci score](#)

46  
47 [Figure 3B: Estimated creatinine clearance by ct score](#)  
48  
49  
50  
51  
52  
53  
54  
55  
56  
57  
58  
59  
60

## Reference List

- 1 Pascual M, Theruvath T, Kawai T et al. Strategies to improve long-term outcomes after renal transplantation. *N Engl J Med* 2002; 346:580-590.
- 2 Kuypers DR, Chapman JR, O'Connell PJ et al. Predictors of renal transplant histology at three months. *Transplantation* 1999; 67:1222-1230.
- 3 Matas AJ, Gillingham KJ, Payne WD et al. The impact of an acute rejection episode on long-term renal allograft survival (t1/2). *Transplantation* 1994;57:857-859.
- 4 Nankivell BJ, Borrows RJ, Fung CL et al. The natural history of chronic allograft nephropathy. *N Engl J Med* 2003; 349:2326-2333.
- 5 Birnbaum LM, Lipman M, Paraskevas S et al. Management of chronic allograft nephropathy: a systematic review. *Clin J Am Soc Nephrol* 2009; 4:860-865.
- 6 Frimat L, Cassuto-Viguiet E, Charpentier B et al. Impact of cyclosporine reduction with MMF: a randomized trial in chronic allograft dysfunction. The 'reference' study. *Am J Transplant* 2006; 6:2725-2734.
- 7 Ekberg H, Tedesco-Silva H, Demirbas A et al. Reduced exposure to calcineurin inhibitors in renal transplantation. *N Engl J Med* 2007; 357:2562-2575.
- 8 Azuma H, Binder J, Heemann U et al. Effects of RS61443 on functional and morphological changes in chronically rejecting rat kidney allografts. *Transplantation* 1995; 59:460-466.
- 9 Ojo AO, Meier-Kriesche HU, Hanson JA et al. Mycophenolate mofetil reduces late renal allograft loss independent of acute rejection. *Transplantation* 2000; 69:2405-2409.
- 10 The Tricontinental Mycophenolate Mofetil Renal Transplantation Study Group. A blinded, randomized clinical trial of mycophenolate mofetil for the prevention of acute rejection in cadaveric renal transplantation. *Transplantation* 1996; 61:722-729.
- 11 European Mycophenolate Mofetil Cooperative Study Group. Placebo controlled study of mycophenolate mofetil combined with cyclosporin and corticosteroids for prevention of acute rejection. *Lancet* 1995; 345, 1321-1325.

- 1  
2  
3  
4  
5  
6  
7  
8  
9  
10  
11  
12  
13  
14  
15  
16  
17  
18  
19  
20  
21  
22  
23  
24  
25  
26  
27  
28  
29  
30  
31  
32  
33  
34  
35  
36  
37  
38  
39  
40  
41  
42  
43  
44  
45  
46  
47  
48  
49  
50  
51  
52  
53  
54  
55  
56  
57  
58  
59  
60
- 12 Djamali A, Vidyasagar A, Yagci G et al. Mycophenolic acid may delay allograft fibrosis by inhibiting transforming growth factor-beta1-induced activation of Nox-2 through the nuclear factor-kappaB pathway. *Transplantation* 2010;90:387-393.
  - 13 Dell'Oglio MP, Zaza G, Rossini M et al. The anti-fibrotic effect of mycophenolic acid-induced neutral endopeptidase. *J Am Soc Nephrol* 2010; 21:2157-2168.
  - 14 Solez K, Colvin RB, Racusen LC et al. Banff 07 classification of renal allograft pathology: updates and future directions. *Am J Transplant* 2008; 8:753-760.
  - 15 Racusen LC, Solez K, Colvin RB et al. The Banff 97 working classification of renal allograft pathology. *Kidney Int* 1999; 55:713-723.
  - 16 Roufosse CA, Shore I, Moss J et al. Peritubular capillary basement membrane multilayering on electron microscopy: a useful marker of early chronic antibody-mediated damage. *Transplantation* 2012; 94:269-274.
  - 17 Nankivell BJ, Borrows RJ, Fung CL et al. The natural history of chronic allograft nephropathy. *N Engl J Med* 2003; 349:2326-2333.
  - 18 Gelens MA, Steegh FM, van Hooff JP et al. Immunosuppressive Regimen and Interstitial Fibrosis and Tubules Atrophy at 12 Months Postrenal Transplant. *Clin J Am Soc Nephrol* 2012; 5:1010-1017.
  - 19 Available at:  
[http://srtr.transplant.hrsa.gov/annual\\_reports/2011/pdf/01\\_kidney\\_12.pdf](http://srtr.transplant.hrsa.gov/annual_reports/2011/pdf/01_kidney_12.pdf). 2013.
  - 20 Ekberg H, van GT, Kaplan B et al. Relationship of tacrolimus exposure and mycophenolate mofetil dose with renal function after renal transplantation. *Transplantation* 2011; 92:82-87.
  - 21 Kamar N, Rostaing L, Cassuto E et al. A multicenter, randomized trial of increased mycophenolic acid dose using enteric-coated mycophenolate sodium with reduced tacrolimus exposure in maintenance kidney transplant recipients. *Clin Nephrol* 2012 ;77:126-136.
  - 22 Ekberg H, van GT, Kaplan B et al. Relationship of tacrolimus exposure and mycophenolate mofetil dose with renal function after renal transplantation. *Transplantation* 2011; 92:82-87.
  - 23 Remuzzi G, Lesti M, Gotti E et al. Mycophenolate mofetil versus azathioprine for prevention of acute rejection in renal transplantation (MYSS): a randomised trial. *Lancet* 2004; 364:503-512.
  - 24 Lloberas N, Torras J, Cruzado JM et al. Influence of MRP2 on MPA pharmacokinetics in renal transplant recipients-results of the Pharmacogenomic



- 1  
2  
3 Substudy within the Symphony Study. *Nephrol Dial Transplant* 2011; 26:3784-  
4 3793.  
5  
6  
7 25 Pascual M, Theruvath T, Kawai T et al. Strategies to improve long-term outcomes  
8 after renal transplantation. *N Engl J Med* 2002; 346:580-590.  
9  
10 26 El-Zoghby ZM, Stegall MD, Lager DJ et al. Identifying specific causes of kidney  
11 allograft loss. *Am J Transplant* 2009;9:527-535.  
12  
13 27 Matas AJ, Leduc R, Rush D et al. Histopathologic clusters differentiate subgroups  
14 within the nonspecific diagnoses of CAN or CR: preliminary data from the  
15 DeKAF study. *Am J Transplant* 2010; 10:315-323.  
16  
17  
18 28 Woodle ES, First MR, Pirsch J et al. A prospective, randomized, double-blind,  
19 placebo-controlled multicenter trial comparing early (7 day) corticosteroid  
20 cessation versus long-term, low-dose corticosteroid therapy. *Ann Surg*; 248: 564-  
21 577.  
22  
23  
24 29 Luo L, Sun Z, Wu W et al. Mycophenolate mofetil and FK506 have different  
25 effects on kidney allograft fibrosis in rats that underwent chronic allograft  
26 nephropathy. *BMC Nephrol* 2012;13:53.  
27  
28  
29 30 Jiang S, Tang Q, Rong R et al. Mycophenolate mofetil inhibits macrophage  
30 infiltration and kidney fibrosis in long-term ischemia-reperfusion injury. *Eur J*  
31 *Pharmacol* 2012; 688:56-61.  
32  
33 31 Dell'Oglio MP, Zaza G, Rossini M et al. The anti-fibrotic effect of mycophenolic  
34 acid-induced neutral endopeptidase. *J Am Soc Nephrol* 2010; 21:2157-2168.  
35  
36  
37 32 Jiang S, Tang Q, Rong R et al. Mycophenolate mofetil inhibits macrophage  
38 infiltration and kidney fibrosis in long-term ischemia-reperfusion injury. *Eur J*  
39 *Pharmacol* 2012; 688:56-61.  
40  
41 33 Tzouveleakis A, Galanopoulos N, Bouros E, Kolios G, Zacharis G, Ntoliou P, et al.  
42 Effect and safety of mycophenolate mofetil or sodium in systemic sclerosis-  
43 associated interstitial lung disease: a meta-analysis. *Pulm Med* 2012; 1-7.  
44  
45  
46 34 Hur E, Bozkurt D, Timur O, Bicak S, Sarsik B, Akcicek F, et al. The effects of  
47 mycophenolate mofetil on encapsulated peritoneal sclerosis model in rats. *Clin*  
48 *Nephrol* 2012; 77:1-7.  
49  
50 35 Manzia TM, Angelico R, Toti L et al. Long-term, maintenance MMF  
51 monotherapy improves the fibrosis progression in liver transplant recipients with  
52 recurrent hepatitis C. *Transpl Int* 2011; 24:461-468.  
53  
54  
55  
56  
57  
58  
59  
60



Table 1. Baseline characteristics

|                                        |                                                                                                                                                               |               |
|----------------------------------------|---------------------------------------------------------------------------------------------------------------------------------------------------------------|---------------|
| <b>RECIPIENT CHARACTERISTICS</b>       | AGE (years)                                                                                                                                                   | 44.67 ± 12.03 |
|                                        | GENDER (f/m)                                                                                                                                                  | 25/54         |
|                                        | PRIMARY RENAL DISEASE<br>(diabetes mellitus,<br>polycystic kidney disease,<br>glomerulonephritis,<br>pyelonephritis/interstitial nephritis,<br>other/unknown) | 24/8/19/6/22  |
| <b>DONOR CHARACTERISTICS</b>           | DONOR SOURCE<br>(deceased/living)                                                                                                                             | 55/24         |
|                                        | AGE (years)                                                                                                                                                   | 43.89 ± 15.55 |
|                                        | GENDER (f/m)                                                                                                                                                  | 36/43         |
| <b>TRANSPLANTATION CHARACTERISTICS</b> | TRANSPLANTED ORGAN<br>(KIDNEY/SPKT)                                                                                                                           | 58/21         |
|                                        | INITIAL IMMUNOSUPPRESSION<br>(anti-IL2,TAC,MMF/anti-IL2,<br>CyA,MMF)                                                                                          | 53/26         |
|                                        | DELAYED GRAFT FUNCTION<br>(no/yes)                                                                                                                            | 53/26         |
|                                        | STEROID FREE (yes/no)                                                                                                                                         | 36/43         |
|                                        | HLA MM                                                                                                                                                        | 3.33 ± 1.51   |

Table 2. eCr<sub>cl</sub>, MMF dose and CNI concentration during first year post transplant

|                                       | Month posttransplant               |                                       |                                      |                                      |
|---------------------------------------|------------------------------------|---------------------------------------|--------------------------------------|--------------------------------------|
|                                       | 1                                  | 3                                     | 6                                    | 12                                   |
| eCr <sub>cl</sub> (ml/min)            |                                    | 56.98 ± 15.79                         | 58.94 ± 16.94                        | 61.47 ± 16.75                        |
| MMF dose (mg)                         | 2500 (750 – 4000)<br>2427 ± 643.17 | 2000 (750 – 4000)<br>2167.72 ± 733.49 | 2000 (1000-4000)<br>2188.29 ± 716.91 | 2000 (1000-4000)<br>2193.04 ± 642.95 |
| Tacrolimus conc.<br>(µg/L)<br>(n=53)  | 10.79 ± 4.16                       | 9.69 ± 3.00                           | 9.03 ± 5.52                          | 7.83 ± 2.45                          |
| Cyclosporin conc.<br>(µg/L)<br>(n=26) | 335.07 (274 – 413)                 | 231.05 (181-265)                      | 206 (170 – 257)                      | 131 (125 – 171)                      |

Table 3. Association of variables with eCr<sub>cl</sub> on 1 year

|                                  | Estimated creatinine clearance (ml/min) | p value |
|----------------------------------|-----------------------------------------|---------|
| Kidney vs. SPKT                  | 57.88 ± 15.47 vs. 71.38 ± 13.45         | 0.001   |
| DGF (yes vs. no)                 | 56.15 ± 17.55 vs. 64.08 ± 15.87         | 0.05    |
| Recipient gender (m vs. f)       | 59.83 ± 16.02 vs. 65 ± 18.07            | 0.2     |
| Donor gender (m vs. f)           | 63.87 ± 16.71 vs. 58.60 ± 16.58         | 0.17    |
| Donor source (D vs. L)           | 62.36 ± 17.85 vs. 59.43 ± 14.05         | 0.47    |
| Steroid-free (yes vs. no)        | 63.94 ± 17.73 vs. 59.39 ± 15.81         | 0.23    |
| Acute rejection (yes vs. no)     | 61.64 ± 16.59 vs. 61.39 ± 16.97         | 0.95    |
|                                  | R                                       | p value |
| Recipient age                    | -0.45                                   | <0.001  |
| Donor age                        | -0.46                                   | <0.001  |
| HLA MM                           | 0.07                                    | 0.52    |
| Average tacrolimus concentration | -0.02                                   | 0.9     |
| Average MMF dose                 | 0.18                                    | 0.1     |
| ci at 1 year post Tx             | -0.34                                   | 0.002   |
| ct at 1 year post Tx             | -0.35                                   | 0.002   |
| cv at 1 year post Tx             | -0.20                                   | 0.07    |

Table 4. Multiple regression analysis of factors associated with kidney function

|                  | Beta<br>( $\beta$ ) | St.Err.<br>$\beta$ | p value |
|------------------|---------------------|--------------------|---------|
| Tx (kidney)      | -0.17               | 0.13               | 0.19    |
| DGF (no)         | 0.04                | 0.1                | 0.71    |
| Recipient age    | -0.41               | 0.1                | <0.001  |
| Donor age        | -0.1                | 0.14               | 0.45    |
| ci at 12 months  | -0.18               | 0.11               | 0.09    |
| Average MMF dose | 0.21                | 0.1                | 0.04    |

Table 5. One-year progression of chronic allograft scores

| Banff score                  | N  | At transplantation | N  | 12 month    | p      |
|------------------------------|----|--------------------|----|-------------|--------|
| Interstitial fibrosis (ci)   | 79 | 0.16 ± 0.44        | 79 | 0.94 ± 0.85 | <0.001 |
| Tubular atrophy (ct)         | 79 | 0.24 ± 0.46        | 79 | 1.05 ± 0.77 | <0.001 |
| Chronic glomerulopathy (cg)  | 79 | 0                  | 79 | 0           |        |
| Mesangial matrix (mm)        | 79 | 0.01 ± 0.11        | 79 | 0.09 ± 0.36 | 0.09   |
| Fibrointimal thickening (cv) | 76 | 0.37 ± 0.83        | 78 | 0.29 ± 0.70 | 0.47   |
| Arteriolar hyalinosis (ah)   | 78 | 0.68 ± 1.04        | 79 | 0.79 ± 1.04 | 0.26   |

Table 6. Correlation of factors associated with progression of ci and ct scores

|                              | $\Delta$ ci                         |          | $\Delta$ ct                         |          |
|------------------------------|-------------------------------------|----------|-------------------------------------|----------|
|                              | mean $\pm$ SD                       | p        | mean $\pm$ SD                       | p        |
| Kidney vs. SPKT              | 0.86 $\pm$ 0.91 vs. 0.67 $\pm$ 0.73 | 0.51     | 0.85 $\pm$ 0.87 vs. 0.86 $\pm$ 0.65 | 0.74     |
| DGF (yes vs. no)             | 1.19 $\pm$ 0.98 vs. 0.62 $\pm$ 0.74 | 0.02     | 1.15 $\pm$ 0.92 vs. 0.69 $\pm$ 0.72 | 0.05     |
| Recipient gender (m vs. f)   | 0.83 $\pm$ 0.88 vs. 0.76 $\pm$ 0.83 | 0.78     | 0.91 $\pm$ 0.83 vs. 0.72 $\pm$ 0.79 | 0.35     |
| Donor gender (m vs. f)       | 0.91 $\pm$ 0.95 vs. 0.69 $\pm$ 0.75 | 0.43     | 0.88 $\pm$ 0.93 vs. 0.81 $\pm$ 0.67 | 0.96     |
| Donor source (D vs. L)       | 0.84 $\pm$ 0.88 vs. 0.75 $\pm$ 0.85 | 0.73     | 0.87 $\pm$ 0.82 vs. 0.79 $\pm$ 0.83 | 0.71     |
| Steroid free (yes vs. no)    | 1.09 $\pm$ 0.87 vs. 0.47 $\pm$ 0.74 | 0.002    | 1.07 $\pm$ 0.83 vs. 0.58 $\pm$ 0.73 | 0.01     |
| Acute rejection (yes vs. no) | 0.8 $\pm$ 0.89 vs. 0.83 $\pm$ 0.82  | 0.78     | 0.93 $\pm$ 0.84 vs. 0.67 $\pm$ 0.76 | 0.23     |
|                              | <b>R</b>                            | <b>p</b> | <b>R</b>                            | <b>p</b> |
| Recipient age                | -0.11                               | 0.33     | -0.11                               | 0.32     |
| Donor age                    | 0.17                                | 0.13     | 0.04                                | 0.73     |
| HLA MM                       | -0.09                               | 0.43     | -0.002                              | 0.99     |
| Average tacrolimus conc.     | -0.009                              | 0.95     | 0.003                               | 0.98     |
| Average MMF dose             | -0.37                               | <0.001   | -0.38                               | <0.001   |
| ci at implantation           | -0.32                               | 0.003    |                                     |          |
| ct at implantation           |                                     |          | -0.45                               | <0.001   |

Table 7. Multivariate general regression analysis for factors related to progression of ci and ct score

| $\Delta ci$        |                  |                   |        |
|--------------------|------------------|-------------------|--------|
|                    | Beta ( $\beta$ ) | Std. Err. $\beta$ | p      |
| ci0                | -0.43            | 0.09              | <0.001 |
| DGF (no)           | -0.22            | 0.11              | <0.05  |
| Average MMF dose   | -0.20            | 0.09              | <0.05  |
| Donor age          | 0.32             | 0.09              | <0.05  |
| Steroid free (yes) | -0.25            | 0.11              | 0.02   |
| $\Delta ct$        |                  |                   |        |
|                    | Beta ( $\beta$ ) | Std. Err. $\beta$ | p      |
| ct0                | -0.44            | 0.09              | <0.001 |
| Average MMF dose   | -0.29            | 0.1               | <0.05  |
| DGF (no)           | -0.29            | 0.1               | <0.05  |
| Steroid free (yes) | -0.09            | 0.11              | 0.39   |

Table 8. Adverse events with respect to 1 year average median MMF dose.

|                                                         | <u>MMF dose &lt; median</u> | <u>MMF dose &gt; median</u> | <u>p</u>    |
|---------------------------------------------------------|-----------------------------|-----------------------------|-------------|
| <u>Average number of infection episodes per patient</u> | <u>1.16 ± 0.97</u>          | <u>1.23 ± 1.22</u>          | <u>0.88</u> |
| <u>Mean time to first infection (days)</u>              | <u>157±138</u>              | <u>175±143</u>              | <u>0.76</u> |
| <u>Proportion of patients with leucopenia</u>           | <u>6 /31</u>                | <u>7 /48</u>                | <u>0.58</u> |



1  
2  
3  
4  
5  
6  
7  
8  
9  
10  
11  
12  
13  
14  
15  
16  
17  
18  
19  
20  
21  
22  
23  
24  
25  
26  
27  
28  
29  
30  
31  
32  
33  
34  
35  
36  
37  
38  
39  
40  
41  
42  
43  
44  
45  
46  
47  
48  
49  
50  
51  
52  
53  
54  
55  
56  
57  
58  
59  
60

Figure 1: Estimated creatinine clearance during first year posttransplant

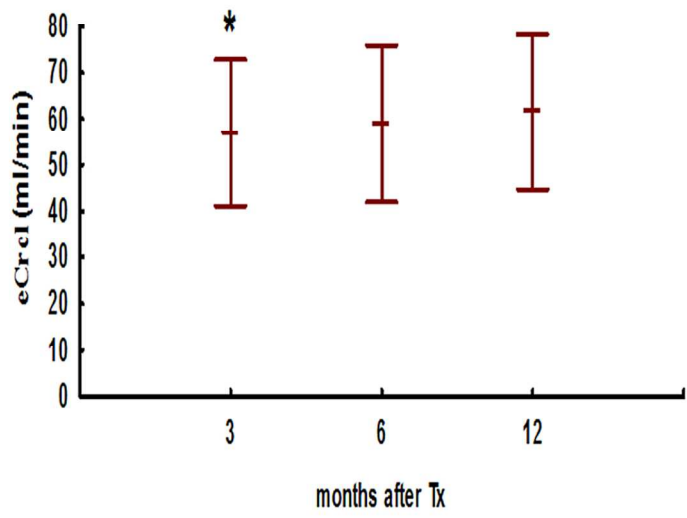

\*,  $p < 0.001$ ; 3 month vs. 12 months eCrCl. Values are shown as mean  $\pm$  SD

90x105mm (300 x 300 DPI)

Figure 2A: Correlation between average MMF dose and progression of ci score

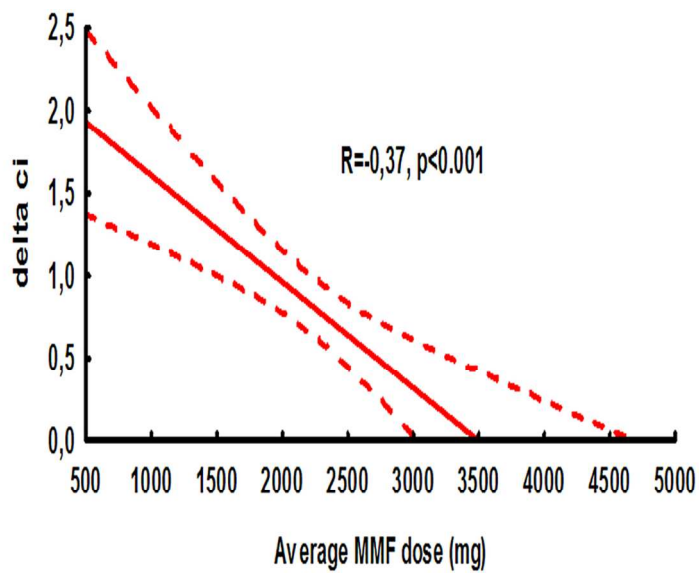

90x121mm (300 x 300 DPI)

1  
2  
3  
4  
5  
6  
7  
8  
9  
10  
11  
12  
13  
14  
15  
16  
17  
18  
19  
20  
21  
22  
23  
24  
25  
26  
27  
28  
29  
30  
31  
32  
33  
34  
35  
36  
37  
38  
39  
40  
41  
42  
43  
44  
45  
46  
47  
48  
49  
50  
51  
52  
53  
54  
55  
56  
57  
58  
59  
60

Figure 2B: Correlation between average MMF dose and progression of ct score

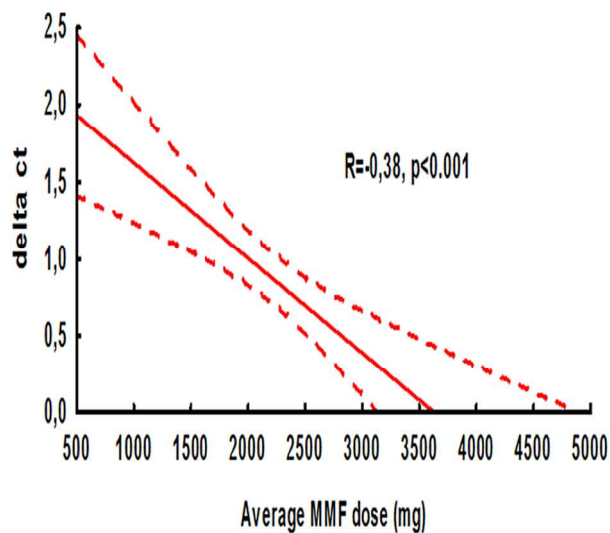

90x121mm (300 x 300 DPI)

1  
2  
3  
4  
5  
6  
7  
8  
9  
10  
11  
12  
13  
14  
15  
16  
17  
18  
19  
20  
21  
22  
23  
24  
25  
26  
27  
28  
29  
30  
31  
32  
33  
34  
35  
36  
37  
38  
39  
40  
41  
42  
43  
44  
45  
46  
47  
48  
49  
50  
51  
52  
53  
54  
55  
56  
57  
58  
59  
60

Figure 3A: Estimated creatinine clearance by ci score

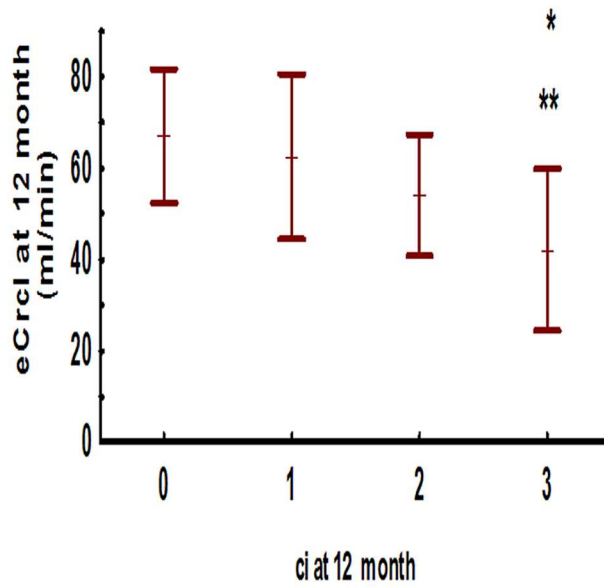

\*  $p < 0.05$ ; score ci 0 vs. score ci 3 (*post hoc* Newman-Keuls test)

\*\*  $p = 0.03$ ; score ci 1 vs. score ci 3

Values are shown as mean  $\pm$  SD

90x121mm (300 x 300 DPI)

1  
2  
3  
4  
5  
6  
7  
8  
9  
10  
11  
12  
13  
14  
15  
16  
17  
18  
19  
20  
21  
22  
23  
24  
25  
26  
27  
28  
29  
30  
31  
32  
33  
34  
35  
36  
37  
38  
39  
40  
41  
42  
43  
44  
45  
46  
47  
48  
49  
50  
51  
52  
53  
54  
55  
56  
57  
58  
59  
60

Figure 3B: Estimated creatinine clearance by ct score

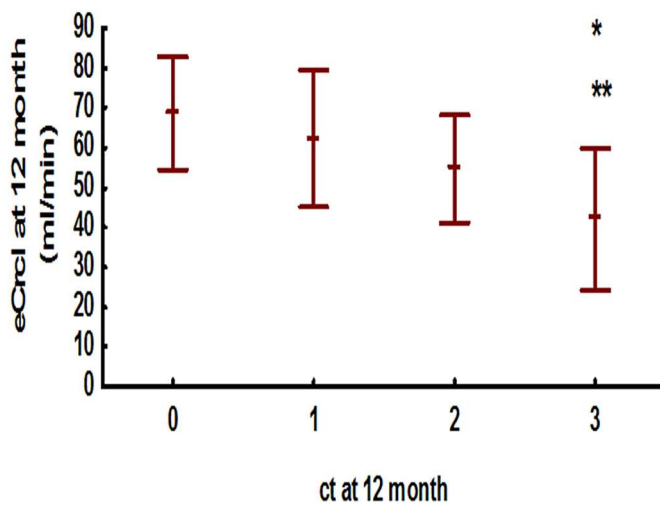

\*  $p < 0.05$ ; score ct 0 vs. score ct 3 (post hoc Newman-Keuls test)

\*\*  $p = 0.03$ ; score ct 1 vs. score ct 3

Values are shown as mean  $\pm$  SD

90x121mm (300 x 300 DPI)

## STROBE Statement—checklist of items that should be included in reports of observational studies

|                           | Item No/page number | Recommendation                                                                                                                                                                                                                                                                                                                                                                                                                                                                                                                                                                                                                                                                                   |
|---------------------------|---------------------|--------------------------------------------------------------------------------------------------------------------------------------------------------------------------------------------------------------------------------------------------------------------------------------------------------------------------------------------------------------------------------------------------------------------------------------------------------------------------------------------------------------------------------------------------------------------------------------------------------------------------------------------------------------------------------------------------|
| <b>Title and abstract</b> | 1/1                 | (a) Indicate the study's design with a commonly used term in the title or the abstract<br>(b) Provide in the abstract an informative and balanced summary of what was done and what was found                                                                                                                                                                                                                                                                                                                                                                                                                                                                                                    |
| <b>Introduction</b>       |                     |                                                                                                                                                                                                                                                                                                                                                                                                                                                                                                                                                                                                                                                                                                  |
| Background/rationale      | 2/5                 | Explain the scientific background and rationale for the investigation being reported                                                                                                                                                                                                                                                                                                                                                                                                                                                                                                                                                                                                             |
| Objectives                | 3/5,6               | State specific objectives, including any prespecified hypotheses                                                                                                                                                                                                                                                                                                                                                                                                                                                                                                                                                                                                                                 |
| <b>Methods</b>            |                     |                                                                                                                                                                                                                                                                                                                                                                                                                                                                                                                                                                                                                                                                                                  |
| Study design              | 4/6                 | Present key elements of study design early in the paper                                                                                                                                                                                                                                                                                                                                                                                                                                                                                                                                                                                                                                          |
| Setting                   | 5/6,7,8,9           | Describe the setting, locations, and relevant dates, including periods of recruitment, exposure, follow-up, and data collection                                                                                                                                                                                                                                                                                                                                                                                                                                                                                                                                                                  |
| Participants              | 6/6                 | (a) <i>Cohort study</i> —Give the eligibility criteria, and the sources and methods of selection of participants. Describe methods of follow-up<br><i>Case-control study</i> —Give the eligibility criteria, and the sources and methods of case ascertainment and control selection. Give the rationale for the choice of cases and controls<br><i>Cross-sectional study</i> —Give the eligibility criteria, and the sources and methods of selection of participants<br>(b) <i>Cohort study</i> —For matched studies, give matching criteria and number of exposed and unexposed<br><i>Case-control study</i> —For matched studies, give matching criteria and the number of controls per case |
| Variables                 | 7/6,7,8             | Clearly define all outcomes, exposures, predictors, potential confounders, and effect modifiers. Give diagnostic criteria, if applicable                                                                                                                                                                                                                                                                                                                                                                                                                                                                                                                                                         |
| Data sources/measurement  | 8*/8                | For each variable of interest, give sources of data and details of methods of assessment (measurement). Describe comparability of assessment methods if there is more than one group                                                                                                                                                                                                                                                                                                                                                                                                                                                                                                             |
| Bias                      | 9                   | Describe any efforts to address potential sources of bias                                                                                                                                                                                                                                                                                                                                                                                                                                                                                                                                                                                                                                        |
| Study size                | 10/6                | Explain how the study size was arrived at                                                                                                                                                                                                                                                                                                                                                                                                                                                                                                                                                                                                                                                        |
| Quantitative variables    | 11/9                | Explain how quantitative variables were handled in the analyses. If applicable, describe which groupings were chosen and why                                                                                                                                                                                                                                                                                                                                                                                                                                                                                                                                                                     |
| Statistical methods       | 12/9                | (a) Describe all statistical methods, including those used to control for confounding<br>(b) Describe any methods used to examine subgroups and interactions<br>(c) Explain how missing data were addressed<br>(d) <i>Cohort study</i> —If applicable, explain how loss to follow-up was addressed<br><i>Case-control study</i> —If applicable, explain how matching of cases and controls was addressed<br><i>Cross-sectional study</i> —If applicable, describe analytical methods taking account of sampling strategy<br>(e) Describe any sensitivity analyses                                                                                                                                |

Continued on next page

**Results**

|                  |                  |                                                                                                                                                                                                                                                                                                                                                                                                               |
|------------------|------------------|---------------------------------------------------------------------------------------------------------------------------------------------------------------------------------------------------------------------------------------------------------------------------------------------------------------------------------------------------------------------------------------------------------------|
| Participants     | 13*<br>/9,<br>10 | (a) Report numbers of individuals at each stage of study—eg numbers potentially eligible, examined for eligibility, confirmed eligible, included in the study, completing follow-up, and analysed<br>(b) Give reasons for non-participation at each stage<br>(c) Consider use of a flow diagram                                                                                                               |
| Descriptive data | 14*<br>/9,<br>10 | (a) Give characteristics of study participants (eg demographic, clinical, social) and information on exposures and potential confounders<br>(b) Indicate number of participants with missing data for each variable of interest<br>(c) <i>Cohort study</i> —Summarise follow-up time (eg, average and total amount)                                                                                           |
| Outcome data     | 15*<br>/11       | <i>Cohort study</i> —Report numbers of outcome events or summary measures over time<br><i>Case-control study</i> —Report numbers in each exposure category, or summary measures of exposure<br><i>Cross-sectional study</i> —Report numbers of outcome events or summary measures                                                                                                                             |
| Main results     | 16/<br>10,<br>11 | (a) Give unadjusted estimates and, if applicable, confounder-adjusted estimates and their precision (eg, 95% confidence interval). Make clear which confounders were adjusted for and why they were included<br>(b) Report category boundaries when continuous variables were categorized<br>(c) If relevant, consider translating estimates of relative risk into absolute risk for a meaningful time period |
| Other analyses   | 17               | Report other analyses done—eg analyses of subgroups and interactions, and sensitivity analyses                                                                                                                                                                                                                                                                                                                |

**Discussion**

|                  |                  |                                                                                                                                                                            |
|------------------|------------------|----------------------------------------------------------------------------------------------------------------------------------------------------------------------------|
| Key results      | 18/<br>12        | Summarise key results with reference to study objectives                                                                                                                   |
| Limitations      | 19/<br>16        | Discuss limitations of the study, taking into account sources of potential bias or imprecision. Discuss both direction and magnitude of any potential bias                 |
| Interpretation   | 20/<br>12-<br>16 | Give a cautious overall interpretation of results considering objectives, limitations, multiplicity of analyses, results from similar studies, and other relevant evidence |
| Generalisability | 21/<br>12-<br>16 | Discuss the generalisability (external validity) of the study results                                                                                                      |

**Other information**

|         |          |                                                                                                                                                               |
|---------|----------|---------------------------------------------------------------------------------------------------------------------------------------------------------------|
| Funding | 22/<br>2 | Give the source of funding and the role of the funders for the present study and, if applicable, for the original study on which the present article is based |
|---------|----------|---------------------------------------------------------------------------------------------------------------------------------------------------------------|

\*Give information separately for cases and controls in case-control studies and, if applicable, for exposed and unexposed groups in cohort and cross-sectional studies.

**Note:** An Explanation and Elaboration article discusses each checklist item and gives methodological background and published examples of transparent reporting. The STROBE checklist is best used in conjunction with this article (freely available on the Web sites of PLoS Medicine at <http://www.plosmedicine.org/>, Annals of Internal Medicine at <http://www.annals.org/>, and Epidemiology at <http://www.epidem.com/>). Information on the STROBE Initiative is available at [www.strobe-statement.org](http://www.strobe-statement.org).

# BMJ Open

## Effect of Mycophenolate Mofetil on Progression of Interstitial Fibrosis and Tubular Atrophy after Kidney Transplantation- A Retrospective Study

|                                 |                                                                                                                                                                                                                                                                                                                                                                                                                                                                                                                                                                                                                                                                                  |
|---------------------------------|----------------------------------------------------------------------------------------------------------------------------------------------------------------------------------------------------------------------------------------------------------------------------------------------------------------------------------------------------------------------------------------------------------------------------------------------------------------------------------------------------------------------------------------------------------------------------------------------------------------------------------------------------------------------------------|
| Journal:                        | <i>BMJ Open</i>                                                                                                                                                                                                                                                                                                                                                                                                                                                                                                                                                                                                                                                                  |
| Manuscript ID:                  | bmjopen-2014-005005.R2                                                                                                                                                                                                                                                                                                                                                                                                                                                                                                                                                                                                                                                           |
| Article Type:                   | Research                                                                                                                                                                                                                                                                                                                                                                                                                                                                                                                                                                                                                                                                         |
| Date Submitted by the Author:   | 06-Jun-2014                                                                                                                                                                                                                                                                                                                                                                                                                                                                                                                                                                                                                                                                      |
| Complete List of Authors:       | Mihovilovic, Karlo; University Hospital Merkur, Division of nephrology<br>Maksimovic, Bojana; University Hospital Merkur, Division of nephrology<br>Kocman, Branislav; University Hospital Merkur, Department of surgery<br>Gustin, Denis; University hospital Merkur, Department of anesthesiology<br>Vidas, Zeljko; University Hospital Merkur, Department of urology<br>Bulimbasic, Stela; University Hospital Dubrava, Department of pathology<br>Ljubanovic, Danica; University Hospital Dubrava, Department of pathology<br>Matovinovic, Mirjana; University Hospital Merkur, Division of nephrology<br>Knotek, Mladen; University Hospital Merkur, Division of nephrology |
| <b>Primary Subject Heading</b>: | Renal medicine                                                                                                                                                                                                                                                                                                                                                                                                                                                                                                                                                                                                                                                                   |
| Secondary Subject Heading:      | Pharmacology and therapeutics, Renal medicine, Pathology                                                                                                                                                                                                                                                                                                                                                                                                                                                                                                                                                                                                                         |
| Keywords:                       | Histopathology < PATHOLOGY, TRANSPLANT MEDICINE, Renal transplantation < NEPHROLOGY                                                                                                                                                                                                                                                                                                                                                                                                                                                                                                                                                                                              |
|                                 |                                                                                                                                                                                                                                                                                                                                                                                                                                                                                                                                                                                                                                                                                  |

SCHOLARONE™  
Manuscripts

only



1

2  
3  
4 **Effect of Mycophenolate Mofetil on Progression of Interstitial Fibrosis and Tubular**  
5  
6 **Atrophy after Kidney Transplantation - A Retrospective Study**  
7  
8

9  
10 Karlo Mihovilović<sup>1</sup>, Bojana Maksimović<sup>1</sup>, Branislav Kocman<sup>2</sup>, Denis Guštin<sup>3</sup>, Željko Vidas<sup>4</sup>,  
11 Stela Bulimbašić<sup>6</sup>, Danica Galešić Ljubanović<sup>5,6</sup>, Mirjana Sabljar Matovinović<sup>1</sup>, Mladen  
12 Knotek<sup>1,5</sup>  
13  
14  
15  
16

17  
18 Clinical Hospital Merkur: <sup>1</sup> Department of Medicine, Renal Division, <sup>2</sup> Department of Surgery,  
19  
20 <sup>3</sup> Department of Anaesthesiology, <sup>4</sup> Department of Urology; <sup>5</sup> University of Zagreb School of  
21  
22 Medicine, Zagreb, Croatia, Clinical Hospital Dubrava: <sup>6</sup> Department of Pathology  
23  
24  
25  
26

27 **Keywords:** interstitial fibrosis, tubular atrophy, kidney function, myophenolate mofetil  
28

29 Word count: Abstract-238  
30

31 Manuscript- 3049  
32

33 **Number of tables: 8**  
34

35 **Number of figures: 3**  
36

37 **Corresponding author:** Dr. Mladen Knotek  
38

39 Department of Medicine, Renal Division  
40

41 Clinical Hospital Merkur  
42

43 Zajceva 19  
44

45 10000 Zagreb  
46

47 Croatia  
48

49 e-mail: mladen.knotek1@zg.t-com.hr (this e-mail address can be published)  
50

51 phone: +38512431123, fax: +38512431123  
52  
53  
54  
55  
56  
57  
58  
59  
60

2

**ABSTRACT:**

**Objectives** - Chronic transplant dysfunction after kidney transplantation is major reason of kidney graft loss and is caused by immunological and non-immunological factors.

There is evidence that mycophenolate mofetil (MMF) may exert a positive effect on renal damage in addition to immunosuppression, by its direct antifibrotic properties. The aim of our study was to retrospectively investigate role of MMF dose on progression of chronic allograft dysfunction and IF/TA.

**Setting** - Retrospective, cohort study.

**Participants** - Kidney transplant patients in tertiary care institution. This is a retrospective cohort study that included 79 patients with kidney and kidney-pancreas transplantation. Immunosuppression consisted of anti-IL2 antibody induction, MMF, a calcineurin inhibitor  $\pm$  steroids.

**Primary outcome measures** - An association of average MMF dose over 1 year post transplant with progression of interstitial fibrosis ( $\Delta$ ci), tubular atrophy ( $\Delta$ ct) and estimated creatinine clearance (eCrcl) at 1 year post transplant was evaluated using univariate and multivariate analyses.

**Results** - Higher average MMF dose was significantly independently associated with better eCrcl at 1 year post transplant ( $b=0.21 \pm 0.1$ ,  $p=0.04$ ). In multiple regression analysis lower  $\Delta$ ci ( $b=-0.2 \pm 0.09$ ,  $p=0.05$ ) and  $\Delta$ ct ( $b=-0.29 \pm 0.1$ ,  $p=0.02$ ) were independently associated with greater average MMF dose. There was no correlation between average MMF dose and incidence of acute rejection ( $p=0.68$ ).

**Conclusions** - Higher average MMF dose over 1 year is associated with better renal function and slower progression of IF/TA, at least partly independent of its immunosuppressive effects.

**Strengths and limitations of this study**

1  
2  
3  
4  
5 Important novel finding in our study is that greater average MMF exposure was strongly  
6 negatively correlated with IF/TA progression during first year after kidney  
7 transplantation. Patients on higher average dose of MMF (up to 4 g daily) during 1 year  
8 post transplantation had significantly lower progression of graft interstitial fibrosis and  
9 tubular atrophy. This is important finding, because of predictive value of graft IF/TA and  
10 should translate into better long-term graft survival. Our study has several shortcomings,  
11 such as its retrospective aspect and relatively short study period. As it was not aim of the  
12 study, we did not report side effects associated with different dosage of MMF.  
13  
14  
15  
16  
17  
18  
19  
20  
21  
22  
23  
24  
25  
26  
27  
28  
29  
30  
31  
32  
33  
34  
35  
36  
37  
38  
39  
40

#### 41 **INTRODUCTION:**

42  
43 Kidney transplantation significantly improves patient survival and quality of life  
44 comparing to dialysis. While significant improvements have been made in the treatment  
45 of acute rejection and short survival of transplanted kidney, there has not been major  
46 improvement in the long-term survival of transplanted kidney.[1] Chronic transplant  
47 dysfunction after kidney transplantation is major cause of kidney graft loss and is evoked  
48 by immunological and non-immunological factors.[2, 3] Histology changes that  
49 determine chronic transplant dysfunction are interstitial fibrosis and tubular atrophy  
50  
51  
52  
53  
54  
55  
56  
57  
58  
59  
60

(IF/TA), arteriosclerosis, arteriolar hyalinosis, glomerulopathy and mesangial matrix expansion.[4] IF/TA is the major pathohistology finding that can be verified on graft biopsies after kidney transplantation and is a predictor of long-term allograft function.[4] Clinical factors that affect progression of IF/TA are: recipient age, HLA mismatch, episodes of severe acute rejection, chronic rejection (esp. antibody-mediated), use of calcineurin inhibitors and BK nephropathy. Avoidance of CNI toxicity is considered as an important step to slow progression of IF/TA.[4-7] Mycophenolate mofetil (MMF) may help lowering CNI toxicity, by allowing lower CNI exposure.[7] MMF reduces the risk of acute allograft rejection, without nephrotoxic side effects and is ideal candidate for long-term calcineurin drug reduction treatment strategies.[7] Retrospective studies of renal recipients who were treated with mycophenolate mofetil comparing azathioprin showed that MMF treated patients had significantly less chronic allograft dysfunction.[8, 9] Besides being associated with lower acute rejection rates as compared to azathioprin,[10, 11] evidence from animal and human studies suggests that MMF may also exert a direct antifibrotic properties due to its antiproliferative action on nonimmune cells, including renal tubular cells and vascular smooth muscle cells.[12, 13] The aim of our study was to investigate role of mycophenolate mofetil dose on progression of IF/TA in kidney transplant recipients.

#### PATIENTS AND METHODS:

##### *Patients:*

This is a retrospective study conducted at Clinical Hospital “Mercur”. This study represents a part of the posttransplant immune monitoring at the Mercur hospital, approved by the Hospital Ethics Committee. Patients gave there informed written consent for anonymized transplant data collection for research purposes. The study included 79 patients

1  
2  
3  
4 with kidney and kidney-pancreas transplantation, transplanted between 2003 and 2011.  
5  
6 Eligible patients had to have protocol kidney biopsy at the time of implantation and 12  
7  
8 months after transplantation. Exclusion criteria have been: dual kidney transplantation,  
9  
10 kidney-liver transplantation, use of antithymocyte immunoglobulin, BK nephropathy and  
11  
12 recurrence of glomerulonephritis after transplantation.  
13  
14

15  
16  
17  
18  
19  
20  
21  
22  
23 *Immunosuppression:*

24  
25 Induction immunosuppression consisted of an anti-IL2 antibody (daclizumab or  
26  
27 basiliximab), calcineurin inhibitor (tacrolimus or cyclosporine), MMF and  
28  
29 methylprednisolone. Maintenance immunosuppression consisted of a calcineurin  
30  
31 inhibitor (tacrolimus or cyclosporine), MMF ± steroids. Target cyclosporine trough  
32  
33 concentrations were 250-350 during first month posttransplant, 200-300 during second to  
34  
35 6<sup>th</sup> month and 100-150 µg/L thereafter. Target tacrolimus trough levels were 10-12  
36  
37 during first month, 8-10 during second to 6<sup>th</sup> month and 5-8 µg/L thereafter.

38  
39 Mycophenolic acid target trough concentration was aimed to be higher than 7.2 µmol/L  
40  
41 with tacrolimus and higher than 5 µmol/L with cyclosporine use.  
42

43  
44 Daclizumab was administered at day 0: 2mg/kg i.v. before opening of vascular  
45  
46 anastomosis and at day 14: 2mg/kg i.v.. Basiliximab was administered at day 0: 20 mg  
47  
48 i.v. before opening of vascular anastomosis and at day 4: 20 mg i.v..  
49

50  
51 Steroids have been dosed as follows: day 0: intraoperatively 500 mg of  
52  
53 methylprednisolone, day 1: 250 mg, day 2: 125mg, day 3: 80 mg and day 4: 40 mg. In  
54  
55 patients with early steroid withdrawal steroids have been withdrawn at day 5 after  
56  
57 transplantation. In patients maintained on steroids, nadir dose of prednisone was 5 mg/d,  
58  
59  
60

1  
2  
3  
4  
5 achieved by 6 months. The criteria for early elimination of steroids were low  
6  
7 immunological risk of the recipient (absence of, or low degree of HLA sensitization,  
8  
9 i.e. PRA <10%) and good immediate renal function, as well as absence of an episode of  
10  
11 acute rejection within 5 days after the transplantation. Steroids have been reintroduced in  
12  
13 patients who suffered acute rejection episode.

14  
15 As prophylaxis for viral (HSV, CMV), fungal (Candida spp.) urinary and P. jiroveci  
16  
17 infections, low-dose fluconazole (for one year), valganciclovir (universally for three  
18  
19 months) and sulfomethoxazol and trimethoprim (for one year) was used.  
20  
21  
22  
23  
24  
25  
26  
27  
28

#### 29 *Renal allograft biopsies:*

30  
31 Protocol kidney biopsies were done at implantation, 1, 3, 6 and 12 months after  
32  
33 transplantation. For cause biopsies were done in case of unexplained deterioration of  
34  
35 renal function, or once weekly in patients with DGF. All rejection episodes were  
36  
37 histologically confirmed. Histopathological analysis was performed by either of two  
38  
39 pathologists who were blinded for immunosuppression. Acute rejections and chronic  
40  
41 allograft scores have been analyzed using Banff 97 classification and its updates.[14, 15]  
42  
43 All protocol and indication biopsies were analyzed by light microscopy, by  
44  
45 immunofluorescence for C4d, and if indicated by immunohistochemistry for BK virus.  
46  
47 Biopsies at 1 year post transplant have been also analyzed by electron microscopy for  
48  
49 signs of chronic antibody-mediated rejection (transplant glomerulopathy, peritubular  
50  
51 capillary basement membrane multilayering).[16]  
52  
53  
54  
55

#### 56 *Clinical outcome parameters:*

57  
58  
59  
60

1  
2  
3  
4 Progression of chronic allograft scores during 1 year posttransplant was calculated by  
5 subtracting implantation chronic scores from chronic allograft scores 12 months  
6  
7 posttransplant: interstitial fibrosis ( $\Delta ci$ ), tubular atrophy ( $\Delta ct$ ), glomerulosclerosis ( $\Delta cg$ ),  
8  
9 mesangial matrix increase ( $\Delta mm$ ), vasculopathy ( $\Delta cv$ ) and arteriolar hyalinosis ( $\Delta ah$ ).  
10  
11 Estimated creatinine clearance ( $eCr_{cl}$ ) at 3, 6 and 12 months posttransplant was calculated  
12  
13 using Cockcroft-Gault formula. Acute rejections with Banff grade IA and IB were treated  
14  
15 with three 500 mg methylprednisolone pulses. In case of acute rejection grade IIA or  
16  
17 greater, patients have been treated with antithymocyte globulin. Antibody-mediated  
18  
19 rejections were treated with steroid pulse and plasmapheresis.  
20  
21  
22 Average dose of MMF during 1 year posttransplant was calculated from MMF dose at  
23  
24 month 1, 3, 6 and 12.  
25  
26  
27 Adverse effects analysed were clinically significant leucopenia, defined as white blood  
28  
29 cell count less than 3000/ml, time to first symptomatic infection and number of  
30  
31 symptomatic infection episodes per patient during first post transplant year.  
32  
33  
34

### 35 *Statistical analysis:*

36  
37 Numerical data are presented as mean  $\pm$  SD or median with range in case of not normal  
38  
39 distribution. Normality of distribution has been tested with Kolmogorov-Smirnov test.  
40  
41 Correlation between two continuous variables has been tested using Spearman  
42  
43 nonparametric correlation. Difference between two groups in continuous variables has  
44  
45 been tested with student t-test or with Mann-Whitney test in non-normally distributed  
46  
47 variables. The significance of the progression in chronic scores was analyzed using  
48  
49 Wilcoxon Matched Pairs test. Univariate and multiple linear regression analysis were  
50  
51 performed to determine predictive factors for progression of chronic allograft scores and  
52  
53 kidney function at 12 months after transplantation. All variables that were associated with  
54  
55 respective outcome in bivariate analysis (at  $p=0.1$ ) were included in multivariate  
56  
57  
58  
59  
60

1  
2  
3  
4  
5 analysis. Because of colinearity between ci and ct score, only one score was included in  
6  
7 each multivariate analysis. Statistical significance was considered at  $p < 0.05$ . All  
8  
9 statistical analyses were performed using Statistica 10 (StatSoft, Tulsa, OK, USA).

## 10 11 12 RESULTS:

### 13 14 15 *Patient and transplant characteristics:*

16  
17 Patient characteristics are shown in Table 1. Recipients were a mean of  $44.67 \pm 12.03$   
18  
19 years old at the time of transplantation, 68 percent of them were male and all were  
20  
21 Caucasians. 33 percent of recipients had DGF after transplantation. Donors were a mean  
22  
23 of  $43.89 \pm 15.55$  years old and 54 percent of them were male. Number of living donor  
24  
25 transplantations was 24 (30 percent). Average daily MMF dose during 1 year  
26  
27 posttransplant was  $2244 \pm 585$  mg (1062 – 4000) (Table 2). As expected, there was no  
28  
29 correlation of MMF dose with MMF trough concentration ( $R = -0.13$ ;  $p = 0.28$ ). Also, there  
30  
31 was no correlation between MMF dose with tacrolimus concentration ( $R = -0.04$ ;  $p = 0.79$ ).  
32  
33 Early steroid withdrawal was done in 46 percent of patients after transplantation.  
34  
35 Incidence of subclinical and clinical acute rejections greater than borderline was 30  
36  
37 percent in first year. There was no correlation between average MMF dose and incidence  
38  
39 of acute rejection ( $p = 0.68$ ).  
40  
41  
42  
43  
44  
45  
46  
47  
48  
49

### 50 51 *Factors associating with eCr<sub>cl</sub>:*

52  
53 Kidney function increased during 1st year post transplant. eCr<sub>cl</sub> at month 3 was  $56.98 \pm$   
54  
55  $15.78$  ml/min, at 6 month  $58.94 \pm 16.94$  ml/min and at 12 month  $61.47 \pm 16.75$  ml/min  
56  
57 ( $p < 0.001$ ; 12 months vs. 3 months) (Figure 1.) eCr<sub>cl</sub> at 1 year post transplant was greater  
58  
59  
60



1  
2  
3  
4 in SPKT recipients ( $71.38 \pm 13.45$  ml/min vs.  $57.88 \pm 16.47$  ml/min;  $p=0.001$ ) and in  
5 patients who did not have DGF ( $64.08 \pm 15.87$  ml/min vs.  $56.15 \pm 17.55$  ml/min;  $p=0.05$ ).  
6  
7 Donor age ( $R=-0.46$ ;  $p<0.001$ ) and recipient age ( $R=-0.46$ ;  $p<0.001$ ) negatively  
8 correlated with  $eCr_{cl}$  at 1 year post transplant, while there was no correlation of renal  
9 function with donor and recipient gender, type of donation (deceased vs. living), HLA  
10 MM, average CNI concentration, steroid-free regimen of immunosuppression, or history  
11 of acute rejection (Table 3). In univariate analysis allograft function at 12 month post Tx  
12 was also negatively correlated with  $ci$  ( $R=-0.34$ ;  $p=0.002$ ) and  $ct$  ( $R=-0.35$ ;  $p=0.002$ ) at  
13 12 month (Figure 2A, Figure 2B). Although MMF dose was positively correlated with  
14 renal function with borderline significance in univariate analysis, in multivariate analysis  
15 there was a significant positive association between greater average MMF dose and better  
16  $eCr_{cl}$  at 12 month post transplant ( $b=0.21 \pm 0.1$ ;  $p=0.04$ ) (Table 4).  
17  
18  
19  
20  
21  
22  
23  
24  
25  
26  
27  
28  
29  
30

### 31 *Factors affecting IF/TA:*

32  
33 The average  $ci$  score increased from  $0.16 \pm 0.44$  to  $0.94 \pm 0.86$  between implantation and  
34 month 12 ( $p<0.001$ ). Average progression of this and other chronic scores during 1 year  
35 post transplant is shown in Table 5. In univariate analysis  $\Delta ci$  ( $R=-0.37$ ;  $p=0.001$ ) and  $\Delta ct$   
36 ( $R=-0.38$ ;  $p=0.001$ ) significantly negatively correlated with average MMF dose (Figure  
37 3A and 3B, Table 6). There was lower progression of  $ci$  score in patients on steroid-free  
38 immunosuppression ( $0.47 \pm 0.7$  vs.  $1.09 \pm 0.87$ ;  $p=0.002$ ) and in those who did not have  
39 DGF ( $0.62 \pm 0.74$  vs.  $1.19 \pm 0.98$ ;  $p=0.02$ ). Acute cellular rejection, recipient and donor  
40 gender, recipient and donor age, HLA MM, deceased vs. living donor, as well as average  
41 concentration of tacrolimus had no significant effect on progression of chronic allograft  
42 scores. Higher average MMF dose was associated with lower progression of  $ci$  and  $ct$   
43 score regardless CNI type (data not shown). Factors that remained significantly  
44 associated with progression of  $ci$  score in multivariate analysis were  $ci_0$  score, donor age,  
45  
46  
47  
48  
49  
50  
51  
52  
53  
54  
55  
56  
57  
58  
59  
60

1  
2  
3  
4 average MMF dose, DGF and steroid-free immunosuppression (Table 7.). In multivariate  
5  
6 analysis only ct0 score, average MMF dose and DGF remained independently associated  
7  
8 with 12-month progression of ct score (Table 7.). Selected AE are shown in Table 8.

9  
10 There was no difference in AE (leucopenia and infections) with respect to average  
11  
12 median MMF dose.  
13

#### 14 15 Discussion: 16

17  
18  
19  
20  
21 The most important novel finding in our study is that greater average MMF exposure was  
22  
23 strongly negatively correlated with IF/TA progression during first year after kidney  
24  
25 transplantation. Patients on higher average dose of MMF during 1 year post  
26  
27 transplantation had significantly lower progression of ci and ct scores. To our knowledge  
28  
29 this is first study demonstrating that there is a dose-dependent protective effect of MMF  
30  
31 on graft IF/TA. Lower progression of IF/TA could not be explained with lower  
32  
33 concentration of CNI, because there was not correlation between tacrolimus  
34  
35 concentration with IF/TA. Similarly, there was no correlation between average MMF  
36  
37 dose and tacrolimus ( $R=-0.04$ ;  $p=0.79$ ) or cyclosporine concentration ( $R=-0.07$ ,  $p=0.79$ ).  
38  
39 In addition, higher average MMF dose was not associated with decreased incidence of  
40  
41 biopsy proven acute rejection, which suggests that antifibrotic properties of higher MMF  
42  
43 dose was at least partly independent of its immunosuppressive effects. Higher MMF dose  
44  
45 had only moderate effect on 1-year renal function, which is consistent with previous  
46  
47 reports showing that transplanted kidneys undergo pathohistology changes without  
48  
49 significant early change in kidney function.[17]

50  
51 In the present retrospective study we have confirmed that IF/TA progression occurs in  
52  
53 first year after kidney transplantation. Several studies have shown that progression of  
54  
55 IF/TA is correlated with type of immunosuppression.[18] In most transplant centers in  
56  
57  
58  
59  
60

1  
2  
3  
4 the United States and Europe immunosuppression consists of induction with an anti-IL2R  
5 antibody or antithymocyte immunoglobulin and maintenance with a calcineurin inhibitor,  
6 MMF and steroids.[19] Studies have reported significant improvement in kidney function  
7 in patients on MMF with lower exposition to CNIs, esp. tacrolimus.[20] Recently, in the  
8 paper of Kamar *et al.* it has been reported that maintenance kidney transplant patients  
9 converted to a higher dose of the mycophenolate sodium (1440 mg daily) with lower  
10 tacrolimus concentration had borderline higher eCr<sub>cl</sub> on month 6 vs. those treated with  
11 lower dose of mycophenolate sodium, with usual tacrolimus concentration (eCr<sub>cl</sub> 49.1 ±  
12 11.1 vs. 44.7 ± 11.5 ml/min; p=0.07).[21] Although there was only borderline  
13 significance, increased mycophenolate dosing with lower tacrolimus concentration was  
14 safe with potential benefit on kidney function.

15  
16  
17  
18  
19  
20  
21  
22  
23  
24  
25  
26  
27 Our study also corroborates recently published findings of a *post hoc* joint analysis of the  
28 Symphony, FDCC and OptiCept trials, where a a lower tacrolimus level and a higher  
29 MMF dose were associated with significantly better kidney function at 1 year post  
30 transplant.[22] Shortcoming of these studies[17,18] is lack of protocol biopsies. The  
31 optimal MMF dosing in patients maintained on contemporary low-dose CNI is still  
32 undetermined. However, some results of early MMF registration trials suggest that higher  
33 MMF exposure might be beneficial; having in mind that there was no antibody induction  
34 in these studies and that CNI was standard dose cyclosporine. Thus, in the Tri-continental  
35 study, group treated with 3 g MMF compared with 2 g of MMF showed lower incidence  
36 of biopsy proven acute rejection episodes (15.9% vs. 19.7%) within 6 month period  
37 selected for the primary efficacy analysis. Similarly, serum creatinine level at 1 year was  
38 1.42 ± 0.07 mg/dL in the MMF 3 g group vs. 1.64 ± 0.07 mg/dL in MMF 2 g group.[12]  
39  
40  
41  
42  
43  
44  
45  
46  
47  
48  
49  
50  
51  
52  
53  
54  
55  
56  
57  
58  
59  
60  
In the European mycophenolate mofetil study same trends regarding higher MMF dose  
were observed.[11] As mentioned before, in these studies there was no antibody  
induction that could have allowed lower dose of cyclosporin with higher dose of MMF

1  
2  
3  
4 and there were no protocol biopsies. In a more recent MYSS trial, there was no difference  
5  
6 in acute rejection rate and renal function between MMF and azathioprine in a  
7  
8 cyclosporine-based protocol.[19] However in that study only one MMF dose was  
9  
10 compared to azathioprine[23] and again there were no protocol biopsies.

11  
12 Unfortunately adequate prospective MMF dose comparison studies in tacrolimus-based  
13  
14 protocols with antibody induction are missing. In the Symphony study it was reported  
15  
16 that patients on tacrolimus-MMF-prednisone maintenance immunosuppression after kidney  
17  
18 transplantation had better kidney function and graft survival with lower number of acute  
19  
20 rejection episodes. Patients in that group had highest MMF exposure.[24] Protocols with  
21  
22 even higher MMF exposure might allow additional CNI sparing, that would decrease side  
23  
24 effect of CNI (hypertension, diabetes, hyperlipidemia, neurotoxicity).[25]  
25  
26

27  
28 Clinical relevance of IF/TA without other concomitant pathology (i.e. recurrent disease  
29  
30 and chronic antibody-mediated rejection) for prediction of graft deterioration and loss is  
31  
32 controversial. In El-Zoghby et al. study there was attempt to identify specific causes of  
33  
34 late kidney allograft failure. The authors found that transplant glomerulopathy was  
35  
36 responsible for 37 percent loss of functioning grafts, while graft loss due to IF/TA was  
37  
38 present in 31 percent of cases (with higher frequency in deceased-donor transplants).[26]

39  
40 At first glance, these results seem at odd with ours, where there were no signs of chronic  
41  
42 antibody-mediated rejection. An explanation for this discrepancy in the results of the two  
43  
44 studies is not completely clear, but the former study included high number of living  
45  
46 transplants (72.5 percent) with glomerulonephritis as primary disease and with follow-up  
47  
48 up to 10 years. Transplant glomerulopathy is more frequently seen late posttransplant,  
49  
50 generally with low incidence. Nevertheless, ours and El-Zoghby study, both  
51  
52 demonstrated that IF/TA even in absence of other pathology is associated with adverse  
53  
54 graft outcome. Another important study, the DeKaf study, tried to use various  
55  
56 histopathologic clusters to differentiate subgroups within diagnosis of IF/TA. They found  
57  
58  
59  
60

1  
2  
3  
4 that cluster with more severe fibrosis plus inflammation and arterial lesions had the worst  
5 prognosis.[27] Although incidence of acute rejection in our study did not vary with MMF  
6 exposure, increased MMF exposure might suppress mild graft inflammation, below the  
7 threshold for diagnosing acute rejection. This is subject of our ongoing investigation and  
8 will be reported separately. An interesting finding of the present study was that early  
9 steroid withdrawal was not associated with worse IF/TA. At first glance this is at odd  
10 with the Astellas trial.[23] However, according to our protocol, patients with DGF were  
11 not included in early steroid withdrawal and Astellas trial, which did not have protocol  
12 biopsies, reported increased IF/TA in early steroid withdrawal group based on indication  
13 biopsies performed early posttransplant, thus more likely reflecting donor-derived  
14 histology changes, rather than effect of steroid withdrawal.[28]

15  
16  
17  
18  
19  
20  
21  
22  
23  
24  
25  
26  
27  
28  
29  
30  
31  
32  
33  
34  
35  
36  
37  
38  
39  
40  
41  
42  
43  
44  
45  
46  
47  
48  
49  
50  
51  
52  
53  
54  
55  
56  
57  
58  
59  
60  
In our study there was only borderline significance of positive association of 1-year eCrCl  
with MMF in univariate analysis. This result is not very surprising since decreased renal  
function is not a very sensitive marker of incipient IF/TA.

Mechanisms by which an average higher exposure to MMF was associated with slower  
progression of IF/TA may be both immune and nonimmune. Because there was no  
difference in incidence of acute rejection with respect to increased MMF exposure in our  
study, we believe that there may be a significant contribution of nonimmune mechanisms  
in retardation of IF/TA in patients with higher MMF. In line with this, in many  
experimental models it has been shown that MMF has antiproliferative and antifibrotic  
effect.[29-31] In the study of Jiang at al. using rat renal ischemia reperfusion injury, a  
time- and dose-dependent correlation of higher MMF dose with better renal function and  
lower interstitial fibrosis was demonstrated. Suggested potential mechanism was lower  
expression of TGF- $\beta$ 1 and MCP-1 with lower macrophage infiltration.[32] In recent  
clinical trials MMF was shown as a safe drug that could be a good candidate for  
treatment of interstitial lung disease in systemic sclerosis.[33] Experimental model of

1  
2  
3  
4 encapsulated peritoneal sclerosis in rats proved beneficial effect of MMF as an inhibitor  
5 of neovascularisation.[34] Also, MMF monotherapy was associated with a positive effect  
6  
7 on hepatic fibrosis progression in HCV liver transplant recipients.[35]  
8  
9

10 Our study has several shortcomings, such as its retrospective aspect and relatively short  
11 study period. Although study period was limited to 12 months post transplantation, a  
12 clear correlation of slower progression of IF/TA with higher average MMF dose  
13 underlines potential benefit of these findings. As mentioned before, in current study we  
14 did not analyze inflammation outside Banff acute rejection threshold in kidney biopsies  
15 with respect to MMF dose. As inflammation in areas of IF/TA is an important predictor  
16 of renal function and graft loss, this is subject of an ongoing work.  
17  
18  
19  
20  
21  
22  
23  
24

25 In summary, higher MMF dose after kidney transplantation might slower progression of  
26 IF/TA, which might lead to better long-term survival of transplanted kidney. Our study  
27 serves as a platform for a prospective, randomized, long-term trial with different MMF  
28 doses to evaluate benefit of higher MMF dose in renal transplant recipients.  
29  
30  
31  
32

33 (NCT018600183).  
34  
35  
36  
37  
38  
39  
40  
41  
42  
43  
44  
45  
46  
47  
48  
49  
50  
51  
52  
53  
54  
55  
56  
57  
58  
59  
60

**Acknowledgments:**

This manuscript has not been published elsewhere, beside as a part of 2011 ASN Annual meeting abstract.

**Contributorship Statement**

Karlo Mihovilović – participated in research design, collecting data, analyzing data and wrote the paper, karlomihovilovic@gmail.com

Bojana Maksimović - participated in collecting and analyzing data, bmaximovic@gmail.com

Branislav Kocman - participated in collecting data, branislav.kocman@gmail.com

Denis Guštin - participated in collecting data, denis.gustin@zg.t-com.hr

Željko Vidas – participated in collecting data, zeljko.vidas1@zg.t-com.hr

Stela Bulimbašić - participated in collecting and analyzing data, stela.bulimbasic@gmail.com

Danica Galešić Ljubanović – participated in collecting and analyzing data,  
danica.ljubanovic@zg.htnet.hr

Mirjana Sabljar Matovinović – participated in collecting data, mirjana.sabljar-  
matovinovic@zg.t-com.hr

Mladen Knotek- proposed research design, analyzed data and participated in writing the paper,  
mladen.knotek1@zg.t-com.hr

**Support and Financial Disclosure Declaration:**

Source of support: Grant by the Ministry of Science, Technology and Sports of the Republic of Croatia to Dr. Mladen Knotek.

Disclosures:

The authors of this manuscript have no conflicts of interest to disclose.

**Data Sharing Statement:** No additional data available.

**Abbreviations:**

IF/TA - interstitial fibrosis and tubular atrophy

MMF - mycophenolate mofetil

BK - polyoma virus BK

CNI - calcineurin inhibitors

DGF - delayed graft function

eCrCl - estimated creatine clearance

SPKT - simultaneous pancreas kidney transplantation

HLA MM – human leukocyte antigen mismatch

AE - adverse events

**Figure Legends**

Figure 1: Estimated creatinine clearance during first year posttransplant

Figure 2A: Correlation between average MMF dose and progression of ci score

Figure 2B: Correlation between average MMF dose and progression of ct score

Figure 3A: Estimated creatinine clearance by ci score

Figure 3B: Estimated creatinine clearance by ct score



## Reference List

- 1 Pascual M, Theruvath T, Kawai T et al. Strategies to improve long-term outcomes after renal transplantation. *N Engl J Med* 2002; 346:580-590.
- 2 Kuypers DR, Chapman JR, O'Connell PJ et al. Predictors of renal transplant histology at three months. *Transplantation* 1999; 67:1222-1230.
- 3 Matas AJ, Gillingham KJ, Payne WD et al. The impact of an acute rejection episode on long-term renal allograft survival (t1/2). *Transplantation* 1994;57:857-859.
- 4 Nankivell BJ, Borrows RJ, Fung CL et al. The natural history of chronic allograft nephropathy. *N Engl J Med* 2003; 349:2326-2333.
- 5 Birnbaum LM, Lipman M, Paraskevas S et al. Management of chronic allograft nephropathy: a systematic review. *Clin J Am Soc Nephrol* 2009; 4:860-865.
- 6 Frimat L, Cassuto-Viguiet E, Charpentier B et al. Impact of cyclosporine reduction with MMF: a randomized trial in chronic allograft dysfunction. The 'reference' study. *Am J Transplant* 2006; 6:2725-2734.
- 7 Ekberg H, Tedesco-Silva H, Demirbas A et al. Reduced exposure to calcineurin inhibitors in renal transplantation. *N Engl J Med* 2007; 357:2562-2575.
- 8 Azuma H, Binder J, Heemann U et al. Effects of RS61443 on functional and morphological changes in chronically rejecting rat kidney allografts. *Transplantation* 1995; 59:460-466.
- 9 Ojo AO, Meier-Kriesche HU, Hanson JA et al. Mycophenolate mofetil reduces late renal allograft loss independent of acute rejection. *Transplantation* 2000; 69:2405-2409.
- 10 The Tricontinental Mycophenolate Mofetil Renal Transplantation Study Group. A blinded, randomized clinical trial of mycophenolate mofetil for the prevention of acute rejection in cadaveric renal transplantation. *Transplantation* 1996; 61,722-729.
- 11 European Mycophenolate Mofetil Cooperative Study Group. Placebo controlled study of mycophenolate mofetil combined with cyclosporin and corticosteroids for prevention of acute rejection. *Lancet* 1995; 345, 1321-1325.
- 12 Djamali A, Vidyasagar A, Yagci G et al. Mycophenolic acid may delay allograft fibrosis by inhibiting transforming growth factor-beta1-induced activation of Nox-2 through the nuclear factor-kappaB pathway. *Transplantation* 2010;90:387-393.

- 1  
2  
3  
4 13 Dell'Oglio MP, Zaza G, Rossini M et al. The anti-fibrotic effect of mycophenolic  
5 acid-induced neutral endopeptidase. *J Am Soc Nephrol* 2010; 21:2157-2168.  
6  
7 14 Solez K, Colvin RB, Racusen LC et al. Banff 07 classification of renal allograft  
8 pathology: updates and future directions. *Am J Transplant* 2008; 8:753-760.  
9  
10 15 Racusen LC, Solez K, Colvin RB et al. The Banff 97 working classification of  
11 renal allograft pathology. *Kidney Int* 1999; 55:713-723.  
12  
13 16 Roufosse CA, Shore I, Moss J et al. Peritubular capillary basement membrane  
14 multilayering on electron microscopy: a useful marker of early chronic antibody-  
15 mediated damage. *Transplantation* 2012; 94:269-274.  
16  
17 17 Nankivell BJ, Borrows RJ, Fung CL et al. The natural history of chronic allograft  
18 nephropathy. *N Engl J Med* 2003; 349:2326-2333.  
19  
20 18 Gelens MA, Steegh FM, van Hooff JP et al. Immunosuppressive Regimen and  
21 Interstitial Fibrosis and Tubules Atrophy at 12 Months Postrenal Transplant. *Clin*  
22 *J Am Soc Nephrol* 2012; 5:1010-1017.  
23  
24 19 Available at:  
25 [http://srr.transplant.hrsa.gov/annual\\_reports/2011/pdf/01\\_kidney\\_12.pdf](http://srr.transplant.hrsa.gov/annual_reports/2011/pdf/01_kidney_12.pdf). 2013.  
26  
27  
28  
29  
30  
31 20 Ekberg H, van GT, Kaplan B et al. Relationship of tacrolimus exposure and  
32 mycophenolate mofetil dose with renal function after renal transplantation.  
33 *Transplantation* 2011; 92:82-87.  
34  
35 21 Kamar N, Rostaing L, Cassuto E et al. A multicenter, randomized trial of  
36 increased mycophenolic acid dose using enteric-coated mycophenolate sodium  
37 with reduced tacrolimus exposure in maintenance kidney transplant recipients.  
38 *Clin Nephrol* 2012 ;77:126-136.  
39  
40 22 Ekberg H, van GT, Kaplan B et al. Relationship of tacrolimus exposure and  
41 mycophenolate mofetil dose with renal function after renal transplantation.  
42 *Transplantation* 2011; 92:82-87.  
43  
44 23 Remuzzi G, Lesti M, Gotti E et al. Mycophenolate mofetil versus azathioprine for  
45 prevention of acute rejection in renal transplantation (MYSS): a randomised trial.  
46 *Lancet* 2004; 364:503-512.  
47  
48 24 Lloberas N, Torras J, Cruzado JM et al. Influence of MRP2 on MPA  
49 pharmacokinetics in renal transplant recipients-results of the Pharmacogenomic  
50 Substudy within the Symphony Study. *Nephrol Dial Transplant* 2011; 26:3784-  
51 3793.  
52  
53 25 Pascual M, Theruvath T, Kawai T et al. Strategies to improve long-term outcomes  
54 after renal transplantation. *N Engl J Med* 2002; 346:580-590.  
55  
56  
57  
58  
59  
60

- 1  
2  
3  
4 26 El-Zoghby ZM, Stegall MD, Lager DJ et al. Identifying specific causes of kidney  
5 allograft loss. *Am J Transplant* 2009;9:527-535.  
6  
7 27 Matas AJ, Leduc R, Rush D et al. Histopathologic clusters differentiate subgroups  
8 within the nonspecific diagnoses of CAN or CR: preliminary data from the  
9 DeKAF study. *Am J Transplant* 2010; 10:315-323.  
10  
11 28 Woodle ES, First MR, Pirsch J et al. A prospective, randomized, double-blind,  
12 placebo-controlled multicenter trial comparing early (7 day) corticosteroid  
13 cessation versus long-term, low-dose corticosteroid therapy. *Ann Surg*; 248: 564-  
14 577.  
15  
16  
17 29 Luo L, Sun Z, Wu W et al. Mycophenolate mofetil and FK506 have different  
18 effects on kidney allograft fibrosis in rats that underwent chronic allograft  
19 nephropathy. *BMC Nephrol* 2012;13:53.  
20  
21  
22 30 Jiang S, Tang Q, Rong R et al. Mycophenolate mofetil inhibits macrophage  
23 infiltration and kidney fibrosis in long-term ischemia-reperfusion injury. *Eur J*  
24 *Pharmacol* 2012; 688:56-61.  
25  
26  
27 31 Dell'Oglio MP, Zaza G, Rossini M et al. The anti-fibrotic effect of mycophenolic  
28 acid-induced neutral endopeptidase. *J Am Soc Nephrol* 2010; 21:2157-2168.  
29  
30 32 Jiang S, Tang Q, Rong R et al. Mycophenolate mofetil inhibits macrophage  
31 infiltration and kidney fibrosis in long-term ischemia-reperfusion injury. *Eur J*  
32 *Pharmacol* 2012; 688:56-61.  
33  
34  
35 33 Tzouveleakis A, Galanopoulos N, Bouros E, et al. Effect and safety of  
36 mycophenolate mofetil or sodium in systemic sclerosis-associated interstitial lung  
37 disease: a meta-analysis. *Pulm Med* 2012; 1-7.  
38  
39 34 Hur E, Bozkurt D, Timur O, et al. The effects of mycophenolate mofetil on  
40 encapsulated peritoneal sclerosis model in rats. *Clin Nephrol* 2012; 77:1-7.  
41  
42  
43 35 Manzia TM, Angelico R, Toti L et al. Long-term, maintenance MMF  
44 monotherapy improves the fibrosis progression in liver transplant recipients with  
45 recurrent hepatitis C. *Transpl Int* 2011; 24:461-468.  
46  
47  
48  
49  
50  
51  
52  
53  
54  
55  
56  
57  
58  
59  
60

20

Table 1. Baseline characteristics

|                                        |                                                                                                                                                               |               |
|----------------------------------------|---------------------------------------------------------------------------------------------------------------------------------------------------------------|---------------|
| <b>RECIPIENT CHARACTERISTICS</b>       | AGE (years)                                                                                                                                                   | 44.67 ± 12.03 |
|                                        | GENDER (f/m)                                                                                                                                                  | 25/54         |
|                                        | PRIMARY RENAL DISEASE<br>(diabetes mellitus,<br>polycystic kidney disease,<br>glomerulonephritis,<br>pyelonephritis/interstitial<br>nephritis, other/unknown) | 24/8/19/6/22  |
| <b>DONOR CHARACTERISTICS</b>           | DONOR SOURCE<br>(deceased/living)                                                                                                                             | 55/24         |
|                                        | AGE (years)                                                                                                                                                   | 43.89 ± 15.55 |
|                                        | GENDER (f/m)                                                                                                                                                  | 36/43         |
| <b>TRANSPLANTATION CHARACTERISTICS</b> | TRANSPLANTED ORGAN<br>(KIDNEY/SPKT)                                                                                                                           | 58/21         |
|                                        | INITIAL IMMUNOSUPPRESSION<br>(anti-IL2,TAC,MMF/anti-IL2,<br>CyA,MMF)                                                                                          | 53/26         |
|                                        | DELAYED GRAFT FUNCTION<br>(no/yes)                                                                                                                            | 53/26         |
|                                        | STEROID FREE (yes/no)                                                                                                                                         | 36/43         |
|                                        | HLA MM                                                                                                                                                        | 3.33 ± 1.51   |

Table 2. eCr<sub>cl</sub>, MMF dose and CNI concentration during first year post transplant

| Month posttransplant            | 1                                  | 3                                     | 6                                    | 12                                   |
|---------------------------------|------------------------------------|---------------------------------------|--------------------------------------|--------------------------------------|
| eCr <sub>cl</sub> (ml/min)      |                                    | 56.98 ± 15.79                         | 58.94 ± 16.94                        | 61.47 ± 16.75                        |
| MMF dose (mg)                   | 2500 (750 – 4000)<br>2427 ± 643.17 | 2000 (750 – 4000)<br>2167.72 ± 733.49 | 2000 (1000-4000)<br>2188.29 ± 716.91 | 2000 (1000-4000)<br>2193.04 ± 642.95 |
| Tacrolimus conc. (µg/L) (n=53)  | 10.79 ± 4.16                       | 9.69 ± 3.00                           | 9.03 ± 5.52                          | 7.83 ± 2.45                          |
| Cyclosporin conc. (µg/L) (n=26) | 335.07 (274 – 413)                 | 231.05 (181-265)                      | 206 (170 – 257)                      | 131 (125 – 171)                      |

Table 3. Association of variables with eCr<sub>cl</sub> on 1 year

|                                     | Estimated creatinine clearance<br>(ml/min) | p<br>value |
|-------------------------------------|--------------------------------------------|------------|
| Kidney vs. SPKT                     | 57.88 ± 15.47 vs. 71.38 ± 13.45            | 0.001      |
| DGF (yes vs. no)                    | 56.15 ± 17.55 vs. 64.08 ± 15.87            | 0.05       |
| Recipient gender (m vs. f)          | 59.83 ± 16.02 vs. 65 ± 18.07               | 0.2        |
| Donor gender (m vs. f)              | 63.87 ± 16.71 vs. 58.60 ± 16.58            | 0.17       |
| Donor source (D vs. L)              | 62.36 ± 17.85 vs. 59.43 ± 14.05            | 0.47       |
| Steroid-free (yes vs. no)           | 63.94 ± 17.73 vs. 59.39 ± 15.81            | 0.23       |
| Acute rejection (yes vs. no)        | 61.64 ± 16.59 vs. 61.39 ± 16.97            | 0.95       |
|                                     | R                                          | p<br>value |
| Recipient age                       | -0.45                                      | <0.0<br>01 |
| Donor age                           | -0.46                                      | <0.0<br>01 |
| HLA MM                              | 0.07                                       | 0.52       |
| Average tacrolimus<br>concentration | -0.02                                      | 0.9        |
| Average MMF dose                    | 0.18                                       | 0.1        |
| ci at 1 year post Tx                | -0.34                                      | 0.002      |
| ct at 1 year post Tx                | -0.35                                      | 0.002      |
| cv at 1 year post Tx                | -0.20                                      | 0.07       |

Table 4. Multiple regression analysis of factors associated with kidney function

|                  | Beta<br>( $\beta$ ) | St.Err<br>$\beta$ | p<br>value |
|------------------|---------------------|-------------------|------------|
| Tx (kidney)      | -0.17               | 0.13              | 0.19       |
| DGF (no)         | 0.04                | 0.1               | 0.71       |
| Recipient age    | -0.41               | 0.1               | <0.001     |
| Donor age        | -0.1                | 0.14              | 0.45       |
| ci at 12 months  | -0.18               | 0.11              | 0.09       |
| Average MMF dose | 0.21                | 0.1               | 0.04       |

Table 5. One-year progression of chronic allograft scores

| Banff score                 | N  | At transplantation | N  | 12 month    | p      |
|-----------------------------|----|--------------------|----|-------------|--------|
| Interstitial fibrosis (ci)  | 79 | 0.16 ± 0.44        | 79 | 0.94 ± 0.85 | <0.001 |
| Tubular atrophy (ct)        | 79 | 0.24 ± 0.46        | 79 | 1.05 ± 0.77 | <0.001 |
| Chronic glomerulopathy (cg) | 79 | 0                  | 79 | 0           |        |
| Mesangial matrix (mm)       | 79 | 0.01 ± 0.11        | 79 | 0.09 ± 0.36 | 0.09   |
| Fibrintimal thickening (cv) | 76 | 0.37 ± 0.83        | 78 | 0.29 ± 0.70 | 0.47   |
| Arteriolar hyalinosis (ah)  | 78 | 0.68 ± 1,04        | 79 | 0.79 ± 1.04 | 0.26   |



Table 6. Correlation of factors associated with progression of ci and ct scores

|                              | $\Delta$ ci                         | $\Delta$ ct |                                     |        |
|------------------------------|-------------------------------------|-------------|-------------------------------------|--------|
|                              | mean $\pm$ SD                       | p           | mean $\pm$ SD                       | p      |
| Kidney vs. SPKT              | 0.86 $\pm$ 0.91 vs. 0.67 $\pm$ 0.73 | 0.51        | 0.85 $\pm$ 0.87 vs. 0.86 $\pm$ 0.65 | 0.74   |
| DGF (yes vs. no)             | 1.19 $\pm$ 0.98 vs. 0.62 $\pm$ 0.74 | 0.02        | 1.15 $\pm$ 0.92 vs. 0.69 $\pm$ 0.72 | 0.05   |
| Recipient gender (m vs. f)   | 0.83 $\pm$ 0.88 vs. 0.76 $\pm$ 0.83 | 0.78        | 0.91 $\pm$ 0.83 vs. 0.72 $\pm$ 0.79 | 0.35   |
| Donor gender (m vs. f)       | 0.91 $\pm$ 0.95 vs. 0.69 $\pm$ 0.75 | 0.43        | 0.88 $\pm$ 0.93 vs. 0.81 $\pm$ 0.67 | 0.96   |
| Donor source (D vs. L)       | 0.84 $\pm$ 0.88 vs. 0.75 $\pm$ 0.85 | 0.73        | 0.87 $\pm$ 0.82 vs. 0.79 $\pm$ 0.83 | 0.71   |
| Steroid free (no vs. yes)    | 1.09 $\pm$ 0.87 vs. 0.47 $\pm$ 0.74 | 0.002       | 1.07 $\pm$ 0.83 vs. 0.58 $\pm$ 0.73 | 0.01   |
| Acute rejection (yes vs. no) | 0.8 $\pm$ 0.89 vs. 0.83 $\pm$ 0.82  | 0.78        | 0.93 $\pm$ 0.84 vs. 0.67 $\pm$ 0.76 | 0.23   |
|                              | R                                   | p           | R                                   | p      |
| Recipient age                | -0.11                               | 0.33        | -0.11                               | 0.32   |
| Donor age                    | 0.17                                | 0.13        | 0.04                                | 0.73   |
| HLA MM                       | -0.09                               | 0.43        | -0.002                              | 0.99   |
| Average tacrolimus conc.     | -0.009                              | 0.95        | 0.003                               | 0.98   |
| Average MMF dose             | -0.37                               | <0.001      | -0.38                               | <0.001 |
| ci at implantation           | -0.32                               | 0.003       |                                     |        |
| ct at implantation           |                                     |             | -0.45                               | <0.001 |

26

Table 7. Multivariate general regression analysis for factors related to progression of ci and ct score

|                    | Beta ( $\beta$ ) | Std. Err. $\beta$ | p      |
|--------------------|------------------|-------------------|--------|
| ci0                | -0.43            | 0.09              | <0.001 |
| DGF (no)           | -0.22            | 0.11              | <0.05  |
| Average MMF dose   | -0.20            | 0.09              | <0.05  |
| Donor age          | 0.32             | 0.09              | <0.05  |
| Steroid free (yes) | -0.25            | 0.11              | 0.02   |
| $\Delta$ ct        |                  |                   |        |
|                    | Beta ( $\beta$ ) | Std. Err. $\beta$ | p      |
| ct0                | -0.44            | 0.09              | <0.001 |
| Average MMF dose   | -0.29            | 0.1               | <0.05  |
| DGF (no)           | -0.29            | 0.1               | <0.05  |
| Steroid free (yes) | -0.09            | 0.11              | 0.39   |

Table 8. Adverse events with respect to 1 year average median MMF dose.

|                                                  | <b>MMF dose &lt; median</b> | <b>MMF dose &gt; median</b> | <b>p</b> |
|--------------------------------------------------|-----------------------------|-----------------------------|----------|
| Average number of infection episodes per patient | 1.16 ± 0.97                 | 1.23 ± 1.22                 | 0.88     |
| Mean time to first infection (days)              | 157±138                     | 175±143                     | 0.76     |
| Proportion of patients with leucopenia           | 6 /31                       | 7 /48                       | 0.58     |

1  
2  
3 **Effect of Mycophenolate Mofetil on Progression of Interstitial Fibrosis and Tubular**  
4  
5 **Atrophy after Kidney Transplantation - A Retrospective Study**  
6  
7  
8  
9

10 Karlo Mihovilović<sup>1</sup>, Bojana Maksimović<sup>1</sup>, Branislav Kocman<sup>2</sup>, Denis Guštin<sup>3</sup>, Željko Vidas<sup>4</sup>,  
11  
12 Stela Bulimbašić<sup>6</sup>, Danica Galešić Ljubanović<sup>5,6</sup>, Mirjana Sabljar Matovinović<sup>1</sup>, Mladen  
13  
14  
15 Knotek<sup>1,5</sup>  
16  
17  
18  
19

20 Clinical Hospital Merkur: <sup>1</sup>Department of Medicine, Renal Division, <sup>2</sup>Department of Surgery,  
21  
22 <sup>3</sup>Department of Anaesthesiology, <sup>4</sup>Department of Urology; <sup>5</sup>University of Zagreb School of  
23  
24  
25 Medicine, Zagreb, Croatia, Clinical Hospital Dubrava: <sup>6</sup>Department of Pathology  
26  
27  
28  
29

30 **Keywords:** interstitial fibrosis, tubular atrophy, kidney function, myophenolate mofetil  
31

32 Word count: Abstract-238  
33

34 Manuscript- 3049  
35

36 **Number of tables: 8**  
37

38 **Number of figures: 3**  
39  
40

41 **Corresponding author:** Dr. Mladen Knotek  
42

43 Department of Medicine, Renal Division  
44

45 Clinical Hospital Merkur  
46

47 Zajceva 19  
48

49 10000 Zagreb  
50

51 Croatia  
52

53 e-mail: mladen.knotek1@zg.t-com.hr (this e-mail address can be published)  
54

55 phone: +38512431123, fax: +38512431123  
56  
57  
58  
59  
60

1  
2  
3  
4  
5  
6  
7  
8  
9  
10  
11  
12  
13  
14  
15  
16  
17  
18  
19  
20  
21  
22  
23  
24  
25  
26  
27  
28  
29  
30  
31  
32  
33  
34  
35  
36  
37  
38  
39  
40  
41  
42  
43  
44  
45  
46  
47  
48  
49  
50  
51  
52  
53  
54  
55  
56  
57  
58  
59  
60

ABSTRACT:

**Objectives** - Chronic transplant dysfunction after kidney transplantation is major reason of kidney graft loss and is caused by immunological and non-immunological factors.

There is evidence that mycophenolate mofetil (MMF) may exert a positive effect on renal damage in addition to immunosuppression, by its direct antifibrotic properties. The aim of our study was to retrospectively investigate role of MMF dose on progression of chronic allograft dysfunction and IF/TA.

**Setting** - Retrospective, cohort study.

**Participants** - Kidney transplant patients in tertiary care institution. This is a retrospective cohort study that included 79 patients with kidney and kidney-pancreas transplantation. Immunosuppression consisted of anti-IL2 antibody induction, MMF, a calcineurin inhibitor  $\pm$  steroids.

**Primary outcome measures** - An association of average MMF dose over 1 year post transplant with progression of interstitial fibrosis ( $\Delta$ ci), tubular atrophy ( $\Delta$ ct) and estimated creatinine clearance (eCrcl) at 1 year post transplant was evaluated using univariate and multivariate analyses.

**Results** - Higher average MMF dose was significantly independently associated with better eCrcl at 1 year post transplant ( $b=0.21 \pm 0.1$ ,  $p=0.04$ ). In multiple regression analysis lower  $\Delta$ ci ( $b=-0.2 \pm 0.09$ ,  $p=0.05$ ) and  $\Delta$ ct ( $b=-0.29 \pm 0.1$ ,  $p=0.02$ ) were independently associated with greater average MMF dose. There was no correlation between average MMF dose and incidence of acute rejection ( $p=0.68$ ).

1  
2  
3 **Conclusions** - Higher average MMF dose over 1 year is associated with better renal  
4  
5 function and slower progression of IF/TA, at least partly independent of its  
6  
7 immunosuppressive effects.  
8  
9

### 10 11 12 **Strengths and limitations of this study**

13  
14 Important novel finding in our study is that greater average MMF exposure was strongly  
15  
16 negatively correlated with IF/TA progression during first year after kidney  
17  
18 transplantation. Patients on higher average dose of MMF (up to 4 g daily) during 1 year  
19  
20 post transplantation had significantly lower progression of graft interstitial fibrosis and  
21  
22 tubular atrophy. This is important finding, because of predictive value of graft IF/TA and  
23  
24 should translate into better long-term graft survival. Our study has several shortcomings,  
25  
26 such as its retrospective aspect and relatively short study period. As it was not aim of the  
27  
28 study, we did not report side effects associated with different dosage of MMF.  
29  
30  
31  
32  
33  
34  
35  
36  
37  
38  
39  
40  
41  
42  
43  
44  
45  
46  
47  
48  
49  
50  
51  
52  
53  
54  
55  
56  
57  
58  
59  
60

## INTRODUCTION:

Kidney transplantation significantly improves patient survival and quality of life comparing to dialysis. While significant improvements have been made in the treatment of acute rejection and short survival of transplanted kidney, there has not been major improvement in the long-term survival of transplanted kidney.[1] Chronic transplant dysfunction after kidney transplantation is major cause of kidney graft loss and is evoked by immunological and non-immunological factors.[2, 3] Histology changes that determine chronic transplant dysfunction are interstitial fibrosis and tubular atrophy (IF/TA), arteriosclerosis, arteriolar hyalinosis, glomerulopathy and mesangial matrix expansion.[4] IF/TA is the major pathohistology finding that can be verified on graft biopsies after kidney transplantation and is a predictor of long-term allograft function.[4] Clinical factors that affect progression of IF/TA are: recipient age, HLA mismatch, episodes of severe acute rejection, chronic rejection (esp. antibody-mediated), use of calcineurin inhibitors and BK nephropathy. Avoidance of CNI toxicity is considered as an important step to slow progression of IF/TA.[4-7] Mycophenolate mofetil (MMF) may help lowering CNI toxicity, by allowing lower CNI exposure.[7] MMF reduces the risk of acute allograft rejection, without nephrotoxic side effects and is ideal candidate for long-term calcineurin drug reduction treatment strategies.[7] Retrospective studies of renal recipients who were treated with mycophenolate mofetil comparing azathioprin showed that MMF treated patients had significantly less chronic allograft dysfunction.[8, 9] Besides being associated with lower acute rejection rates as compared to azathioprin,[10, 11] evidence from animal and human studies suggests that

MMF may also exert a direct antifibrotic properties due to its antiproliferative action on nonimmune cells, including renal tubular cells and vascular smooth muscle cells.[12, 13]

The aim of our study was to investigate role of mycophenolate mofetil dose on progression of IF/TA in kidney transplant recipients.

## PATIENTS AND METHODS:

### *Patients:*

This is a retrospective study conducted at Clinical Hospital “Mercur”. This study represents a part of the posttransplant immune monitoring at the Mercur hospital, approved by the Hospital Ethics Committee. Patients gave there informed written consent for anonymized transplant data collection for research purposes. The study included 79 patients with kidney and kidney-pancreas transplantation, transplanted between 2003 and 2011. Eligible patients had to have protocol kidney biopsy at the time of implantation and 12 months after transplantation. Exclusion criteria have been: dual kidney transplantation, kidney-liver transplantation, use of antithymocyte immunoglobulin, BK nephropathy and recurrence of glomerulonephritis after transplantation.

### *Immunosuppression:*



1  
2  
3 Induction immunosuppression consisted of an anti-IL2 antibody (daclizumab or  
4 basiliximab), calcineurin inhibitor (tacrolimus or cyclosporine), MMF and  
5  
6 methylprednisolone. Maintenance immunosuppression consisted of a calcineurin  
7  
8 inhibitor (tacrolimus or cyclosporine), MMF  $\pm$  steroids. Target cyclosporine trough  
9  
10 concentrations were 250-350 during first month posttransplant, 200-300 during second to  
11  
12 6<sup>th</sup> month and 100-150  $\mu$ g/L thereafter. Target tacrolimus trough levels were 10-12  
13  
14 during first month, 8-10 during second to 6<sup>th</sup> month and 5-8  $\mu$ g/L thereafter.  
15  
16  
17

18  
19 Mycophenolic acid target trough concentration was aimed to be higher than 7.2  $\mu$ mol/L  
20  
21 with tacrolimus and higher than 5  $\mu$ mol/L with cyclosporine use.  
22  
23

24 Daclizumab was administered at day 0: 2mg/kg i.v. before opening of vascular  
25  
26 anastomosis and at day 14: 2mg/kg i.v.. Basiliximab was administered at day 0: 20 mg  
27  
28 i.v. before opening of vascular anastomosis and at day 4: 20 mg i.v..  
29  
30

31 Steroids have been dosed as follows: day 0: intraoperatively 500 mg of  
32  
33 methylprednisolone, day 1: 250 mg, day 2: 125mg, day 3: 80 mg and day 4: 40 mg. In  
34  
35 patients with early steroid withdrawal steroids have been withdrawn at day 5 after  
36  
37 transplantation. In patients maintained on steroids, nadir dose of prednisone was 5 mg/d,  
38  
39 achieved by 6 months. The criteria for early elimination of steroids were low  
40  
41 immunological risk of the recipient (absence of, or low degree of HLA sensitization,  
42  
43 i.e. PRA <10%) and good immediate renal function, as well as absence of an episode of  
44  
45 acute rejection within 5 days after the transplantation. Steroids have been reintroduced in  
46  
47 patients who suffered acute rejection episode.  
48  
49  
50  
51  
52  
53  
54  
55  
56  
57  
58  
59  
60

1  
2  
3 As prophylaxis for viral (HSV, CMV), fungal (Candida spp.) urinary and P. jiroveci  
4  
5 infections, low-dose fluconazole (for one year), valganciclovir (universally for three  
6  
7 months) and sulfomethoxazol and trimethoprim (for one year) was used.  
8  
9

10  
11  
12  
13  
14  
15  
16  
17  
18  
19  
20 *Renal allograft biopsies:*

21  
22 Protocol kidney biopsies were done at implantation, 1, 3, 6 and 12 months after  
23  
24 transplantation. For cause biopsies were done in case of unexplained deterioration of  
25  
26 renal function, or once weekly in patients with DGF. All rejection episodes were  
27  
28 histologically confirmed. Histopathological analysis was performed by either of two  
29  
30 pathologists who were blinded for immunosuppression. Acute rejections and chronic  
31  
32 allograft scores have been analyzed using Banff 97 classification and its updates.[14, 15]  
33

34  
35 All protocol and indication biopsies were analyzed by light microscopy, by  
36  
37 immunofluorescence for C4d, and if indicated by immunohistochemistry for BK virus.  
38  
39 Biopsies at 1 year post transplant have been also analyzed by electron microscopy for  
40  
41 signs of chronic antibody-mediated rejection (transplant glomerulopathy, peritubular  
42  
43 capillary basement membrane multilayering).[16]  
44  
45  
46  
47  
48

49  
50 *Clinical outcome parameters:*

51  
52 Progression of chronic allograft scores during 1 year posttransplant was calculated by  
53  
54 subtracting implantation chronic scores from chronic allograft scores 12 months  
55  
56  
57  
58  
59  
60

1  
2  
3 posttransplant: interstitial fibrosis ( $\Delta ci$ ), tubular atrophy ( $\Delta ct$ ), glomerulosclerosis ( $\Delta cg$ ),  
4  
5 mesangial matrix increase ( $\Delta mm$ ), vasculopathy ( $\Delta cv$ ) and arteriolar hyalinosis ( $\Delta ah$ ).  
6  
7

8 Estimated creatinine clearance (eCrCl) at 3, 6 and 12 months posttransplant was calculated  
9  
10 using Cockcroft-Gault formula. Acute rejections with Banff grade IA and IB were treated  
11  
12 with three 500 mg methylprednisolone pulses. In case of acute rejection grade IIA or  
13  
14 greater, patients have been treated with antithymocyte globulin. Antibody-mediated  
15  
16 rejections were treated with steroid pulse and plasmapheresis.  
17  
18

19  
20 Average dose of MMF during 1 year posttransplant was calculated from MMF dose at  
21  
22 month 1, 3, 6 and 12.  
23

24 Adverse effects analysed were clinically significant leucopenia, defined as white blood  
25  
26 cell count less than 3000/ml, time to first symptomatic infection and number of  
27  
28 symptomatic infection episodes per patient during first post transplant year.  
29  
30  
31  
32  
33

#### 34 *Statistical analysis:*

35  
36 Numerical data are presented as mean  $\pm$  SD or median with range in case of not normal  
37  
38 distribution. Normality of distribution has been tested with Kolmogorov-Smirnov test.  
39  
40 Correlation between two continuous variables has been tested using Spearman  
41  
42 nonparametric correlation. Difference between two groups in continuous variables has  
43  
44 been tested with student t-test or with Mann-Whitney test in non-normally distributed  
45  
46 variables. The significance of the progression in chronic scores was analyzed using  
47  
48 Wilcoxon Matched Pairs test. Univariate and multiple linear regression analysis were  
49  
50 performed to determine predictive factors for progression of chronic allograft scores and  
51  
52 kidney function at 12 months after transplantation. All variables that were associated with  
53  
54  
55  
56  
57  
58  
59  
60

1  
2  
3  
4  
5  
6  
7  
8  
9  
10  
11  
12  
13  
14  
15  
16  
17  
18  
19  
20  
21  
22  
23  
24  
25  
26  
27  
28  
29  
30  
31  
32  
33  
34  
35  
36  
37  
38  
39  
40  
41  
42  
43  
44  
45  
46  
47  
48  
49  
50  
51  
52  
53  
54  
55  
56  
57  
58  
59  
60

respective outcome in bivariate analysis (at  $p \leq 0.1$ ) were included in multivariate analysis. Because of colinearity between ci and ct score, only one score was included in each multivariate analysis. Statistical significance was considered at  $p < 0.05$ . All statistical analyses were performed using Statistica 10 (StatSoft, Tulsa, OK, USA).

## RESULTS:

### *Patient and transplant characteristics:*

Patient characteristics are shown in Table 1. Recipients were a mean of  $44.67 \pm 12.03$  years old at the time of transplantation, 68 percent of them were male and all were Caucasians. 33 percent of recipients had DGF after transplantation. Donors were a mean of  $43.89 \pm 15.55$  years old and 54 percent of them were male. Number of living donor transplantations was 24 (30 percent). Average daily MMF dose during 1 year posttransplant was  $2244 \pm 585$  mg (1062 – 4000) (Table 2). As expected, there was no correlation of MMF dose with MMF trough concentration ( $R = -0.13$ ;  $p = 0.28$ ). Also, there was no correlation between MMF dose with tacrolimus concentration ( $R = -0.04$ ;  $p = 0.79$ ). Early steroid withdrawal was done in 46 percent of patients after transplantation. Incidence of subclinical and clinical acute rejections greater than borderline was 30 percent in first year. There was no correlation between average MMF dose and incidence of acute rejection ( $p = 0.68$ ).

1  
2  
3  
4  
5  
6  
7  
8  
9  
10  
11  
12  
13  
14  
15  
16  
17  
18  
19  
20  
21  
22  
23  
24  
25  
26  
27  
28  
29  
30  
31  
32  
33  
34  
35  
36  
37  
38  
39  
40  
41  
42  
43  
44  
45  
46  
47  
48  
49  
50  
51  
52  
53  
54  
55  
56  
57  
58  
59  
60

*Factors associating with eCr<sub>cl</sub>:*

Kidney function increased during 1st year post transplant. eCr<sub>cl</sub> at month 3 was  $56.98 \pm 15.78$  ml/min, at 6 month  $58.94 \pm 16.94$  ml/min and at 12 month  $61.47 \pm 16.75$  ml/min ( $p < 0.001$ ; 12 months vs. 3 months) (Figure 1.) eCr<sub>cl</sub> at 1 year post transplant was greater in SPKT recipients ( $71.38 \pm 13.45$  ml/min vs.  $57.88 \pm 16.47$  ml/min;  $p = 0.001$ ) and in patients who did not have DGF ( $64.08 \pm 15.87$  ml/min vs.  $56.15 \pm 17.55$  ml/min;  $p = 0.05$ ). Donor age ( $R = -0.46$ ;  $p < 0.001$ ) and recipient age ( $R = -0.46$ ;  $p < 0.001$ ) negatively correlated with eCr<sub>cl</sub> at 1 year post transplant, while there was no correlation of renal function with donor and recipient gender, type of donation (deceased vs. living), HLA MM, average CNI concentration, steroid-free regimen of immunosuppression, or history of acute rejection (Table 3). In univariate analysis allograft function at 12 month post Tx was also negatively correlated with ci ( $R = -0.34$ ;  $p = 0.002$ ) and ct ( $R = -0.35$ ;  $p = 0.002$ ) at 12 month (Figure 2A, Figure 2B). Although MMF dose was positively correlated with renal function with borderline significance in univariate analysis, in multivariate analysis there was a significant positive association between greater average MMF dose and better eCr<sub>cl</sub> at 12 month post transplant ( $b = 0.21 \pm 0.1$ ;  $p = 0.04$ ) (Table 4).

*Factors affecting IF/TA:*

The average ci score increased from  $0.16 \pm 0.44$  to  $0.94 \pm 0.86$  between implantation and month 12 ( $p < 0.001$ ). Average progression of this and other chronic scores during 1 year post transplant is shown in Table 5. In univariate analysis  $\Delta ci$  ( $R = -0.37$ ;  $p = 0.001$ ) and  $\Delta ct$  ( $R = -0.38$ ;  $p = 0.001$ ) significantly negatively correlated with average MMF dose (Figure 3A and 3B, Table 6). There was lower progression of ci score in patients on steroid-free

1  
2  
3 immunosuppression ( $0.47 \pm 0.7$  vs.  $1.09 \pm 0.87$ ;  $p=0.002$ ) and in those who did not have  
4 DGF ( $0.62 \pm 0.74$  vs  $1.19 \pm 0.98$ ;  $p=0.02$ ). Acute cellular rejection, recipient and donor  
5 gender, recipient and donor age, HLA MM, deceased vs. living donor, as well as average  
6 concentration of tacrolimus had no significant effect on progression of chronic allograft  
7 scores. Higher average MMF dose was associated with lower progression of ci and ct  
8 score regardless CNI type (data not shown). Factors that remained significantly  
9 associated with progression of ci score in multivariate analysis were ci0 score, donor age,  
10 average MMF dose, DGF and steroid-free immunosuppression (Table 7.). In multivariate  
11 analysis only ct0 score, average MMF dose and DGF remained independently associated  
12 with 12-month progression of ct score (Table 7.). Selected AE are shown in Table 8.  
13  
14  
15  
16  
17  
18  
19  
20  
21  
22  
23  
24  
25  
26  
27  
28  
29  
30  
31  
32  
33  
34  
35  
36  
37  
38  
39  
40  
41  
42  
43  
44  
45  
46  
47  
48  
49  
50  
51  
52  
53  
54  
55  
56  
57  
58  
59  
60

There was no difference in AE (leucopenia and infections) with respect to average median MMF dose.

#### Discussion:

The most important novel finding in our study is that greater average MMF exposure was strongly negatively correlated with IF/TA progression during first year after kidney transplantation. Patients on higher average dose of MMF during 1 year post transplantation had significantly lower progression of ci and ct scores. To our knowledge this is first study demonstrating that there is a dose-dependent protective effect of MMF on graft IF/TA. Lower progression of IF/TA could not be explained with lower concentration of CNI, because there was not correlation between tacrolimus concentration with IF/TA. Similarly, there was no correlation between average MMF

1  
2  
3 dose and tacrolimus ( $R=-0.04$ ;  $p=0.79$ ) or cyclosporine concentration ( $R=-0.07$ ,  $p=0.79$ ).

4  
5 In addition, higher average MMF dose was not associated with decreased incidence of  
6  
7  
8 biopsy proven acute rejection, which suggests that antifibrotic properties of higher MMF  
9  
10 dose was at least partly independent of its immunosuppressive effects. Higher MMF dose  
11  
12 had only moderate effect on 1-year renal function, which is consistent with previous  
13  
14 reports showing that transplanted kidneys undergo pathohistology changes without  
15  
16 significant early change in kidney function.[17]

17  
18 In the present retrospective study we have confirmed that IF/TA progression occurs in  
19  
20 first year after kidney transplantation. Several studies have shown that progression of  
21  
22 IF/TA is correlated with type of immunosuppression.[18] In most transplant centers in  
23  
24 the United States and Europe immunosuppression consists of induction with an anti-IL2R  
25  
26 antibody or antithymocyte immunoglobulin and maintenance with a calcineurin inhibitor,  
27  
28 MMF and steroids.[19] Studies have reported significant improvement in kidney function  
29  
30 in patients on MMF with lower exposition to CNIs, esp. tacrolimus.[20] Recently, in the  
31  
32 paper of Kamar *et al.* it has been reported that maintenance kidney transplant patients  
33  
34 converted to a higher dose of the mycophenolate sodium (1440 mg daily) with lower  
35  
36 tacrolimus concentration had borderline higher  $eCr_{cl}$  on month 6 *vs.* those treated with  
37  
38 lower dose of mycophenolate sodium, with usual tacrolimus concentration ( $eCr_{cl}$   $49.1 \pm$   
39  
40  $11.1$  *vs.*  $44.7 \pm 11.5$  ml/min;  $p=0.07$ ).[21] Although there was only borderline  
41  
42 significance, increased mycophenolate dosing with lower tacrolimus concentration was  
43  
44 safe with potential benefit on kidney function.  
45  
46  
47  
48  
49  
50  
51

52  
53 Our study also corroborates recently published findings of a *post hoc* joint analysis of the  
54  
55 Symphony, FDCC and OptiCept trials, where a lower tacrolimus level and a higher  
56  
57  
58  
59  
60

1  
2  
3 MMF dose were associated with significantly better kidney function at 1 year post  
4 transplant.[22] Shortcoming of these studies[17,18] is lack of protocol biopsies. The  
5  
6 optimal MMF dosing in patients maintained on contemporary low-dose CNI is still  
7  
8 undetermined. However, some results of early MMF registration trials suggest that higher  
9  
10 MMF exposure might be beneficial; having in mind that there was no antibody induction  
11  
12 in these studies and that CNI was standard dose cyclosporine. Thus, in the Tri-continental  
13  
14 study, group treated with 3 g MMF compared with 2 g of MMF showed lower incidence  
15  
16 of biopsy proven acute rejection episodes (15.9% vs. 19.7%) within 6 month period  
17  
18 selected for the primary efficacy analysis. Similarly, serum creatinine level at 1 year was  
19  
20  $1.42 \pm 0.07$  mg/dL in the MMF 3 g group vs.  $1.64 \pm 0.07$  mg/dL in MMF 2 g group.[12]  
21  
22 In the European mycophenolate mofetil study same trends regarding higher MMF dose  
23  
24 were observed.[11] As mentioned before, in these studies there was no antibody  
25  
26 induction that could have allowed lower dose of cyclosporin with higher dose of MMF  
27  
28 and there were no protocol biopsies. In a more recent MYSS trial, there was no difference  
29  
30 in acute rejection rate and renal function between MMF and azathioprine in a  
31  
32 cyclosporine-based protocol.[19] However in that study only one MMF dose was  
33  
34 compared to azathioprine[23] and again there were no protocol biopsies.  
35  
36  
37 Unfortunately adequate prospective MMF dose comparison studies in tacrolimus-based  
38  
39 protocols with antibody induction are missing. In the Symphony study it was reported  
40  
41 that patients on tacrolimus-MMF-prednisone maintenance immunosuppression after kidney  
42  
43 transplantation had better kidney function and graft survival with lower number of acute  
44  
45 rejection episodes. Patients in that group had highest MMF exposure.[24] Protocols with  
46  
47  
48  
49  
50  
51  
52  
53  
54  
55  
56  
57  
58  
59  
60



1  
2  
3 even higher MMF exposure might allow additional CNI sparing, that would decrease side  
4 effect of CNI (hypertension, diabetes, hyperlipidemia, neurotoxicity).[25]  
5

6  
7  
8 Clinical relevance of IF/TA without other concomitant pathology (i.e. recurrent disease  
9 and chronic antibody-mediated rejection) for prediction of graft deterioration and loss is  
10 controversial. In El-Zoghby et al. study there was attempt to identify specific causes of  
11 late kidney allograft failure. The authors found that transplant glomerulopathy was  
12 responsible for 37 percent loss of functioning grafts, while graft loss due to IF/TA was  
13 present in 31 percent of cases (with higher frequency in deceased-donor transplants).[26]  
14

15  
16  
17 At first glance, these results seem at odd with ours, where there were no signs of chronic  
18 antibody-mediated rejection. An explanation for this discrepancy in the results of the two  
19 studies is not completely clear, but the former study included high number of living  
20 transplants (72.5 percent) with glomerulonephritis as primary disease and with follow-up  
21 up to 10 years. Transplant glomerulopathy is more frequently seen late posttransplant,  
22 generally with low incidence. Nevertheless, ours and El-Zoghby study, both  
23 demonstrated that IF/TA even in absence of other pathology is associated with adverse  
24 graft outcome. Another important study, the DeKaf study, tried to use various  
25 histopathologic clusters to differentiate subgroups within diagnosis of IF/TA. They found  
26 that cluster with more severe fibrosis plus inflammation and arterial lesions had the worst  
27 prognosis.[27] Although incidence of acute rejection in our study did not vary with MMF  
28 exposure, increased MMF exposure might suppress mild graft inflammation, below the  
29 threshold for diagnosing acute rejection. This is subject of our ongoing investigation and  
30 will be reported separately. An interesting finding of the present study was that early  
31 steroid withdrawal was not associated with worse IF/TA. At first glance this is at odd  
32  
33  
34  
35  
36  
37  
38  
39  
40  
41  
42  
43  
44  
45  
46  
47  
48  
49  
50  
51  
52  
53  
54  
55  
56  
57  
58  
59  
60

1  
2  
3 with the Astellas trial.[23] However, according to our protocol, patients with DGF were  
4  
5 not included in early steroid withdrawal and Astellas trial, which did not have protocol  
6  
7 biopsies, reported increased IF/TA in early steroid withdrawal group based on indication  
8  
9 biopsies performed early posttransplant, thus more likely reflecting donor-derived  
10  
11 histology changes, rather than effect of steroid withdrawal.[28]  
12

13  
14  
15 In our study there was only borderline significance of positive association of 1-year eCr<sub>cl</sub>  
16  
17 with MMF in univariate analysis. This result is not very surprising since decreased renal  
18  
19 function is not a very sensitive marker of incipient IF/TA.  
20

21  
22 Mechanisms by which an average higher exposure to MMF was associated with slower  
23  
24 progression of IF/TA may be both immune and nonimmune. Because there was no  
25  
26 difference in incidence of acute rejection with respect to increased MMF exposure in our  
27  
28 study, we believe that there may be a significant contribution of nonimmune mechanisms  
29  
30 in retardation of IF/TA in patients with higher MMF. In line with this, in many  
31  
32 experimental models it has been shown that MMF has antiproliferative and antifibrotic  
33  
34 effect.[29-31] In the study of Jiang at al. using rat renal ischemia reperfusion injury, a  
35  
36 time- and dose-dependent correlation of higher MMF dose with better renal function and  
37  
38 lower interstitial fibrosis was demonstrated. Suggested potential mechanism was lower  
39  
40 expression of TGF- $\beta$ 1 and MCP-1 with lower macrophage infiltration.[32] In recent  
41  
42 clinical trials MMF was shown as a safe drug that could be a good candidate for  
43  
44 treatment of interstitial lung disease in systemic sclerosis.[33] Experimental model of  
45  
46 encapsulated peritoneal sclerosis in rats proved beneficial effect of MMF as an inhibitor  
47  
48 of neovascularisation.[34] Also, MMF monotherapy was associated with a positive effect  
49  
50 on hepatic fibrosis progression in HCV liver transplant recipients.[35]  
51  
52  
53  
54  
55  
56  
57  
58  
59  
60

1  
2  
3 Our study has several shortcomings, such as its retrospective aspect and relatively short  
4 study period. Although study period was limited to 12 months post transplantation, a  
5 clear correlation of slower progression of IF/TA with higher average MMF dose  
6 underlines potential benefit of these findings. As mentioned before, in current study we  
7 did not analyze inflammation outside Banff acute rejection threshold in kidney biopsies  
8 with respect to MMF dose. As inflammation in areas of IF/TA is an important predictor  
9 of renal function and graft loss, this is subject of an ongoing work.

10 In summary, higher MMF dose after kidney transplantation might slower progression of  
11 IF/TA, which might lead to better long-term survival of transplanted kidney. Our study  
12 serves as a platform for a prospective, randomized, long-term trial with different MMF  
13 doses to evaluate benefit of higher MMF dose in renal transplant recipients.

14  
15  
16  
17  
18  
19  
20  
21  
22  
23  
24  
25  
26  
27  
28  
29  
30 (NCT018600183).  
31  
32  
33  
34  
35  
36  
37  
38  
39  
40  
41  
42  
43  
44  
45  
46  
47  
48  
49  
50  
51  
52  
53  
54  
55  
56  
57  
58  
59  
60

**Acknowledgments:**

This manuscript has not been published elsewhere, beside as a part of 2011 ASN Annual meeting abstract.

**Contributorship Statement**

Karlo Mihovilović – participated in research design, collecting data, analyzing data and wrote the paper, karlomihovilovic@gmail.com

Bojana Maksimović - participated in collecting and analyzing data, bmaximovic@gmail.com

Branislav Kocman - participated in collecting data, branislav.kocman@gmail.com

Denis Guštin - participated in collecting data, denis.gustin@zg.t-com.hr

Željko Vidas – participated in collecting data, zeljko.vidas1@zg.t-com.hr

Stela Bulimbašić - participated in collecting and analyzing data, stela.bulimbasic@gmail.com

Danica Galešić Ljubanović – participated in collecting and analyzing data,

danica.ljubanovic@zg.htnet.hr

Mirjana Sabljar Matovinović – participated in collecting data, mirjana.sabljar-

matovinovic@zg.t-com.hr

Mladen Knotek- proposed research design, analyzed data and participated in writing the paper,

mladen.knotek1@zg.t-com.hr

**Support and Financial Disclosure Declaration:**

Source of support: Grant by the Ministry of Science, Technology and Sports of the Republic of Croatia to Dr. Mladen Knotek.

Disclosures:

The authors of this manuscript have no conflicts of interest to disclose.

**Data Sharing Statement:** No additional data available.

**Abbreviations:**

IF/TA - interstitial fibrosis and tubular atrophy

MMF - mycophenolate mofetil

BK - polyoma virus BK

CNI - calcineurin inhibitors

DGF - delayed graft function

eCrCl - estimated creatinine clearance

SPKT - simultaneous pancreas kidney transplantation

HLA MM – human leukocyte antigen mismatch

AE - adverse events

**Figure Legends**

Figure 1: Estimated creatinine clearance during first year posttransplant

Figure 2A: Correlation between average MMF dose and progression of ci score

Figure 2B: Correlation between average MMF dose and progression of ct score

Figure 3A: Estimated creatinine clearance by ci score

Figure 3B: Estimated creatinine clearance by ct score

### Reference List

- 1 Pascual M, Theruvath T, Kawai T et al. Strategies to improve long-term outcomes after renal transplantation. *N Engl J Med* 2002; 346:580-590.
- 2 Kuypers DR, Chapman JR, O'Connell PJ et al. Predictors of renal transplant histology at three months. *Transplantation* 1999; 67:1222-1230.
- 3 Matas AJ, Gillingham KJ, Payne WD et al. The impact of an acute rejection episode on long-term renal allograft survival (t1/2). *Transplantation* 1994;57:857-859.
- 4 Nankivell BJ, Borrows RJ, Fung CL et al. The natural history of chronic allograft nephropathy. *N Engl J Med* 2003; 349:2326-2333.
- 5 Birnbaum LM, Lipman M, Paraskevas S et al. Management of chronic allograft nephropathy: a systematic review. *Clin J Am Soc Nephrol* 2009; 4:860-865.
- 6 Frimat L, Cassuto-Viguiet E, Charpentier B et al. Impact of cyclosporine reduction with MMF: a randomized trial in chronic allograft dysfunction. The 'reference' study. *Am J Transplant* 2006; 6:2725-2734.
- 7 Ekberg H, Tedesco-Silva H, Demirbas A et al. Reduced exposure to calcineurin inhibitors in renal transplantation. *N Engl J Med* 2007; 357:2562-2575.
- 8 Azuma H, Binder J, Heemann U et al. Effects of RS61443 on functional and morphological changes in chronically rejecting rat kidney allografts. *Transplantation* 1995; 59:460-466.
- 9 Ojo AO, Meier-Kriesche HU, Hanson JA et al. Mycophenolate mofetil reduces late renal allograft loss independent of acute rejection. *Transplantation* 2000; 69:2405-2409.
- 10 The Tricontinental Mycophenolate Mofetil Renal Transplantation Study Group. A blinded, randomized clinical trial of mycophenolate mofetil for the prevention of acute rejection in cadaveric renal transplantation. *Transplantation* 1996; 61,722-729.
- 11 European Mycophenolate Mofetil Cooperative Study Group. Placebo controlled study of mycophenolate mofetil combined with cyclosporin and corticosteroids for prevention of acute rejection. *Lancet* 1995; 345, 1321-1325.

- 1  
2  
3  
4  
5  
6  
7  
8  
9  
10  
11  
12  
13  
14  
15  
16  
17  
18  
19  
20  
21  
22  
23  
24  
25  
26  
27  
28  
29  
30  
31  
32  
33  
34  
35  
36  
37  
38  
39  
40  
41  
42  
43  
44  
45  
46  
47  
48  
49  
50  
51  
52  
53  
54  
55  
56  
57  
58  
59  
60
- 12 Djamali A, Vidyasagar A, Yagci G et al. Mycophenolic acid may delay allograft fibrosis by inhibiting transforming growth factor-beta1-induced activation of Nox-2 through the nuclear factor-kappaB pathway. *Transplantation* 2010;90:387-393.
  - 13 Dell'Oglio MP, Zaza G, Rossini M et al. The anti-fibrotic effect of mycophenolic acid-induced neutral endopeptidase. *J Am Soc Nephrol* 2010; 21:2157-2168.
  - 14 Solez K, Colvin RB, Racusen LC et al. Banff 07 classification of renal allograft pathology: updates and future directions. *Am J Transplant* 2008; 8:753-760.
  - 15 Racusen LC, Solez K, Colvin RB et al. The Banff 97 working classification of renal allograft pathology. *Kidney Int* 1999; 55:713-723.
  - 16 Roufosse CA, Shore I, Moss J et al. Peritubular capillary basement membrane multilayering on electron microscopy: a useful marker of early chronic antibody-mediated damage. *Transplantation* 2012; 94:269-274.
  - 17 Nankivell BJ, Borrows RJ, Fung CL et al. The natural history of chronic allograft nephropathy. *N Engl J Med* 2003; 349:2326-2333.
  - 18 Gelens MA, Steegh FM, van Hooff JP et al. Immunosuppressive Regimen and Interstitial Fibrosis and Tubules Atrophy at 12 Months Postrenal Transplant. *Clin J Am Soc Nephrol* 2012; 5:1010-1017.
  - 19 Available at:  
[http://srrtr.transplant.hrsa.gov/annual\\_reports/2011/pdf/01\\_kidney\\_12.pdf](http://srrtr.transplant.hrsa.gov/annual_reports/2011/pdf/01_kidney_12.pdf). 2013.
  - 20 Ekberg H, van GT, Kaplan B et al. Relationship of tacrolimus exposure and mycophenolate mofetil dose with renal function after renal transplantation. *Transplantation* 2011; 92:82-87.
  - 21 Kamar N, Rostaing L, Cassuto E et al. A multicenter, randomized trial of increased mycophenolic acid dose using enteric-coated mycophenolate sodium with reduced tacrolimus exposure in maintenance kidney transplant recipients. *Clin Nephrol* 2012 ;77:126-136.
  - 22 Ekberg H, van GT, Kaplan B et al. Relationship of tacrolimus exposure and mycophenolate mofetil dose with renal function after renal transplantation. *Transplantation* 2011; 92:82-87.
  - 23 Remuzzi G, Lesti M, Gotti E et al. Mycophenolate mofetil versus azathioprine for prevention of acute rejection in renal transplantation (MYSS): a randomised trial. *Lancet* 2004; 364:503-512.
  - 24 Lloberas N, Torras J, Cruzado JM et al. Influence of MRP2 on MPA pharmacokinetics in renal transplant recipients-results of the Pharmacogenomic

- 1  
2  
3 Substudy within the Symphony Study. *Nephrol Dial Transplant* 2011; 26:3784-  
4 3793.  
5  
6  
7 25 Pascual M, Theruvath T, Kawai T et al. Strategies to improve long-term outcomes  
8 after renal transplantation. *N Engl J Med* 2002; 346:580-590.  
9  
10 26 El-Zoghby ZM, Stegall MD, Lager DJ et al. Identifying specific causes of kidney  
11 allograft loss. *Am J Transplant* 2009;9:527-535.  
12  
13 27 Matas AJ, Leduc R, Rush D et al. Histopathologic clusters differentiate subgroups  
14 within the nonspecific diagnoses of CAN or CR: preliminary data from the  
15 DeKAF study. *Am J Transplant* 2010; 10:315-323.  
16  
17  
18 28 Woodle ES, First MR, Pirsch J et al. A prospective, randomized, double-blind,  
19 placebo-controlled multicenter trial comparing early (7 day) corticosteroid  
20 cessation versus long-term, low-dose corticosteroid therapy. *Ann Surg*; 248: 564-  
21 577.  
22  
23  
24 29 Luo L, Sun Z, Wu W et al. Mycophenolate mofetil and FK506 have different  
25 effects on kidney allograft fibrosis in rats that underwent chronic allograft  
26 nephropathy. *BMC Nephrol* 2012;13:53.  
27  
28  
29 30 Jiang S, Tang Q, Rong R et al. Mycophenolate mofetil inhibits macrophage  
30 infiltration and kidney fibrosis in long-term ischemia-reperfusion injury. *Eur J*  
31 *Pharmacol* 2012; 688:56-61.  
32  
33 31 Dell'Oglio MP, Zaza G, Rossini M et al. The anti-fibrotic effect of mycophenolic  
34 acid-induced neutral endopeptidase. *J Am Soc Nephrol* 2010; 21:2157-2168.  
35  
36  
37 32 Jiang S, Tang Q, Rong R et al. Mycophenolate mofetil inhibits macrophage  
38 infiltration and kidney fibrosis in long-term ischemia-reperfusion injury. *Eur J*  
39 *Pharmacol* 2012; 688:56-61.  
40  
41 33 Tzouveleakis A, Galanopoulos N, Bouros E, et al. Effect and safety of  
42 mycophenolate mofetil or sodium in systemic sclerosis-associated interstitial lung  
43 disease: a meta-analysis. *Pulm Med* 2012; 1-7.  
44  
45  
46 34 Hur E, Bozkurt D, Timur O, et al. The effects of mycophenolate mofetil on  
47 encapsulated peritoneal sclerosis model in rats. *Clin Nephrol* 2012; 77:1-7.  
48  
49 35 Manzia TM, Angelico R, Toti L et al. Long-term, maintenance MMF  
50 monotherapy improves the fibrosis progression in liver transplant recipients with  
51 recurrent hepatitis C. *Transpl Int* 2011; 24:461-468.  
52  
53  
54  
55  
56  
57  
58  
59  
60



Table 1. Baseline characteristics

|                                        |                                                                                                                                                               |               |
|----------------------------------------|---------------------------------------------------------------------------------------------------------------------------------------------------------------|---------------|
| <b>RECIPIENT CHARACTERISTICS</b>       | AGE (years)                                                                                                                                                   | 44.67 ± 12.03 |
|                                        | GENDER (f/m)                                                                                                                                                  | 25/54         |
|                                        | PRIMARY RENAL DISEASE<br>(diabetes mellitus,<br>polycystic kidney disease,<br>glomerulonephritis,<br>pyelonephritis/interstitial nephritis,<br>other/unknown) | 24/8/19/6/22  |
| <b>DONOR CHARACTERISTICS</b>           | DONOR SOURCE<br>(deceased/living)                                                                                                                             | 55/24         |
|                                        | AGE (years)                                                                                                                                                   | 43.89 ± 15.55 |
|                                        | GENDER (f/m)                                                                                                                                                  | 36/43         |
| <b>TRANSPLANTATION CHARACTERISTICS</b> | TRANSPLANTED ORGAN<br>(KIDNEY/SPKT)                                                                                                                           | 58/21         |
|                                        | INITIAL IMMUNOSUPPRESSION<br>(anti-IL2,TAC,MMF/anti-IL2,<br>CyA,MMF)                                                                                          | 53/26         |
|                                        | DELAYED GRAFT FUNCTION<br>(no/yes)                                                                                                                            | 53/26         |
|                                        | STEROID FREE (yes/no)                                                                                                                                         | 36/43         |
|                                        | HLA MM                                                                                                                                                        | 3.33 ± 1.51   |

Table 2. eCr<sub>cl</sub>, MMF dose and CNI concentration during first year post transplant

|                                       | Month posttransplant               |                                       |                                      |                                      |
|---------------------------------------|------------------------------------|---------------------------------------|--------------------------------------|--------------------------------------|
|                                       | 1                                  | 3                                     | 6                                    | 12                                   |
| eCr <sub>cl</sub> (ml/min)            |                                    | 56.98 ± 15.79                         | 58.94 ± 16.94                        | 61.47 ± 16.75                        |
| MMF dose (mg)                         | 2500 (750 – 4000)<br>2427 ± 643.17 | 2000 (750 – 4000)<br>2167.72 ± 733.49 | 2000 (1000-4000)<br>2188.29 ± 716.91 | 2000 (1000-4000)<br>2193.04 ± 642.95 |
| Tacrolimus conc.<br>(µg/L)<br>(n=53)  | 10.79 ± 4.16                       | 9.69 ± 3.00                           | 9.03 ± 5.52                          | 7.83 ± 2.45                          |
| Cyclosporin conc.<br>(µg/L)<br>(n=26) | 335.07 (274 – 413)                 | 231.05 (181-265)                      | 206 (170 – 257)                      | 131 (125 – 171)                      |

Table 3. Association of variables with eCr<sub>cl</sub> on 1 year

|                                  | Estimated creatinine clearance (ml/min) | p value |
|----------------------------------|-----------------------------------------|---------|
| Kidney vs. SPKT                  | 57.88 ± 15.47 vs. 71.38 ± 13.45         | 0.001   |
| DGF (yes vs. no)                 | 56.15 ± 17.55 vs. 64.08 ± 15.87         | 0.05    |
| Recipient gender (m vs. f)       | 59.83 ± 16.02 vs. 65 ± 18.07            | 0.2     |
| Donor gender (m vs. f)           | 63.87 ± 16.71 vs. 58.60 ± 16.58         | 0.17    |
| Donor source (D vs. L)           | 62.36 ± 17.85 vs. 59.43 ± 14.05         | 0.47    |
| Steroid-free (yes vs. no)        | 63.94 ± 17.73 vs. 59.39 ± 15.81         | 0.23    |
| Acute rejection (yes vs. no)     | 61.64 ± 16.59 vs. 61.39 ± 16.97         | 0.95    |
|                                  | R                                       | p value |
| Recipient age                    | -0.45                                   | <0.001  |
| Donor age                        | -0.46                                   | <0.001  |
| HLA MM                           | 0.07                                    | 0.52    |
| Average tacrolimus concentration | -0.02                                   | 0.9     |
| Average MMF dose                 | 0.18                                    | 0.1     |
| ci at 1 year post Tx             | -0.34                                   | 0.002   |
| ct at 1 year post Tx             | -0.35                                   | 0.002   |
| cv at 1 year post Tx             | -0.20                                   | 0.07    |

Table 4. Multiple regression analysis of factors associated with kidney function

|                  | Beta<br>( $\beta$ ) | St.Err.<br>$\beta$ | p value |
|------------------|---------------------|--------------------|---------|
| Tx (kidney)      | -0.17               | 0.13               | 0.19    |
| DGF (no)         | 0.04                | 0.1                | 0.71    |
| Recipient age    | -0.41               | 0.1                | <0.001  |
| Donor age        | -0.1                | 0.14               | 0.45    |
| ci at 12 months  | -0.18               | 0.11               | 0.09    |
| Average MMF dose | 0.21                | 0.1                | 0.04    |

Table 5. One-year progression of chronic allograft scores

| Banff score                  | N  | At transplantation | N  | 12 month    | p      |
|------------------------------|----|--------------------|----|-------------|--------|
| Interstitial fibrosis (ci)   | 79 | 0.16 ± 0.44        | 79 | 0.94 ± 0.85 | <0.001 |
| Tubular atrophy (ct)         | 79 | 0.24 ± 0.46        | 79 | 1.05 ± 0.77 | <0.001 |
| Chronic glomerulopathy (cg)  | 79 | 0                  | 79 | 0           |        |
| Mesangial matrix (mm)        | 79 | 0.01 ± 0.11        | 79 | 0.09 ± 0.36 | 0.09   |
| Fibrointimal thickening (cv) | 76 | 0.37 ± 0.83        | 78 | 0.29 ± 0.70 | 0.47   |
| Arteriolar hyalinosis (ah)   | 78 | 0.68 ± 1.04        | 79 | 0.79 ± 1.04 | 0.26   |

Table 6. Correlation of factors associated with progression of ci and ct scores

|                              | $\Delta$ ci                         |        | $\Delta$ ct                         |        |
|------------------------------|-------------------------------------|--------|-------------------------------------|--------|
|                              | mean $\pm$ SD                       | p      | mean $\pm$ SD                       | p      |
| Kidney vs. SPKT              | 0.86 $\pm$ 0.91 vs. 0.67 $\pm$ 0.73 | 0.51   | 0.85 $\pm$ 0.87 vs. 0.86 $\pm$ 0.65 | 0.74   |
| DGF (yes vs. no)             | 1.19 $\pm$ 0.98 vs. 0.62 $\pm$ 0.74 | 0.02   | 1.15 $\pm$ 0.92 vs. 0.69 $\pm$ 0.72 | 0.05   |
| Recipient gender (m vs. f)   | 0.83 $\pm$ 0.88 vs. 0.76 $\pm$ 0.83 | 0.78   | 0.91 $\pm$ 0.83 vs. 0.72 $\pm$ 0.79 | 0.35   |
| Donor gender (m vs. f)       | 0.91 $\pm$ 0.95 vs. 0.69 $\pm$ 0.75 | 0.43   | 0.88 $\pm$ 0.93 vs. 0.81 $\pm$ 0.67 | 0.96   |
| Donor source (D vs. L)       | 0.84 $\pm$ 0.88 vs. 0.75 $\pm$ 0.85 | 0.73   | 0.87 $\pm$ 0.82 vs. 0.79 $\pm$ 0.83 | 0.71   |
| Steroid free (no vs. yes)    | 1.09 $\pm$ 0.87 vs. 0.47 $\pm$ 0.74 | 0.002  | 1.07 $\pm$ 0.83 vs. 0.58 $\pm$ 0.73 | 0.01   |
| Acute rejection (yes vs. no) | 0.8 $\pm$ 0.89 vs. 0.83 $\pm$ 0.82  | 0.78   | 0.93 $\pm$ 0.84 vs. 0.67 $\pm$ 0.76 | 0.23   |
|                              | R                                   | p      | R                                   | p      |
| Recipient age                | -0.11                               | 0.33   | -0.11                               | 0.32   |
| Donor age                    | 0.17                                | 0.13   | 0.04                                | 0.73   |
| HLA MM                       | -0.09                               | 0.43   | -0.002                              | 0.99   |
| Average tacrolimus conc.     | -0.009                              | 0.95   | 0.003                               | 0.98   |
| Average MMF dose             | -0.37                               | <0.001 | -0.38                               | <0.001 |
| ci at implantation           | -0.32                               | 0.003  |                                     |        |
| ct at implantation           |                                     |        | -0.45                               | <0.001 |

Table 7. Multivariate general regression analysis for factors related to progression of ci and ct score

| $\Delta ci$        |                  |                   |        |
|--------------------|------------------|-------------------|--------|
|                    | Beta ( $\beta$ ) | Std. Err. $\beta$ | p      |
| ci0                | -0.43            | 0.09              | <0.001 |
| DGF (no)           | -0.22            | 0.11              | <0.05  |
| Average MMF dose   | -0.20            | 0.09              | <0.05  |
| Donor age          | 0.32             | 0.09              | <0.05  |
| Steroid free (yes) | -0.25            | 0.11              | 0.02   |
| $\Delta ct$        |                  |                   |        |
|                    | Beta ( $\beta$ ) | Std. Err. $\beta$ | p      |
| ct0                | -0.44            | 0.09              | <0.001 |
| Average MMF dose   | -0.29            | 0.1               | <0.05  |
| DGF (no)           | -0.29            | 0.1               | <0.05  |
| Steroid free (yes) | -0.09            | 0.11              | 0.39   |

Table 8. Adverse events with respect to 1 year average median MMF dose.

|                                                  | <b>MMF dose &lt; median</b> | <b>MMF dose &gt; median</b> | <b>p</b> |
|--------------------------------------------------|-----------------------------|-----------------------------|----------|
| Average number of infection episodes per patient | 1.16 ± 0.97                 | 1.23 ± 1.22                 | 0.88     |
| Mean time to first infection (days)              | 157±138                     | 175±143                     | 0.76     |
| Proportion of patients with leucopenia           | 6 /31                       | 7 /48                       | 0.58     |



1  
2  
3  
4  
5  
6  
7  
8  
9  
10  
11  
12  
13  
14  
15  
16  
17  
18  
19  
20  
21  
22  
23  
24  
25  
26  
27  
28  
29  
30  
31  
32  
33  
34  
35  
36  
37  
38  
39  
40  
41  
42  
43  
44  
45  
46  
47  
48  
49  
50  
51  
52  
53  
54  
55  
56  
57  
58  
59  
60

Figure 1: Estimated creatinine clearance during first year posttransplant



\*; p<0.001; 3 month vs. 12 months eCrCl. Values are shown as mean ±SD

90x105mm (300 x 300 DPI)

Figure 2A: Correlation between average MMF dose and progression of ci score



90x121mm (300 x 300 DPI)

1  
2  
3  
4  
5  
6  
7  
8  
9  
10  
11  
12  
13  
14  
15  
16  
17  
18  
19  
20  
21  
22  
23  
24  
25  
26  
27  
28  
29  
30  
31  
32  
33  
34  
35  
36  
37  
38  
39  
40  
41  
42  
43  
44  
45  
46  
47  
48  
49  
50  
51  
52  
53  
54  
55  
56  
57  
58  
59  
60

Figure 2B: Correlation between average MMF dose and progression of ct score

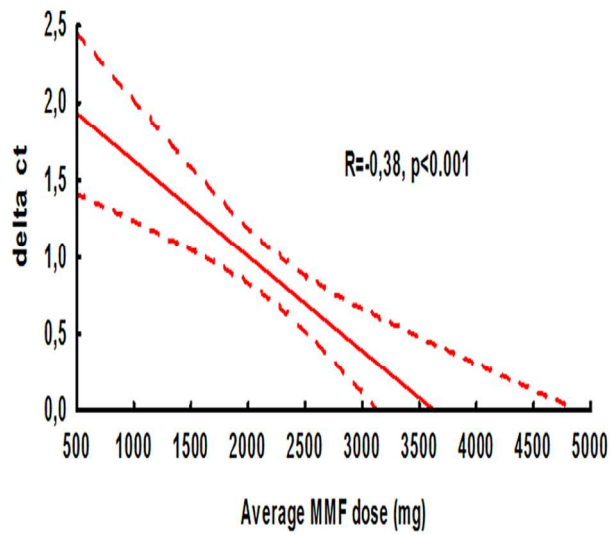

90x121mm (300 x 300 DPI)

1  
2  
3  
4  
5  
6  
7  
8  
9  
10  
11  
12  
13  
14  
15  
16  
17  
18  
19  
20  
21  
22  
23  
24  
25  
26  
27  
28  
29  
30  
31  
32  
33  
34  
35  
36  
37  
38  
39  
40  
41  
42  
43  
44  
45  
46  
47  
48  
49  
50  
51  
52  
53  
54  
55  
56  
57  
58  
59  
60

Figure 3A: Estimated creatinine clearance by ci score

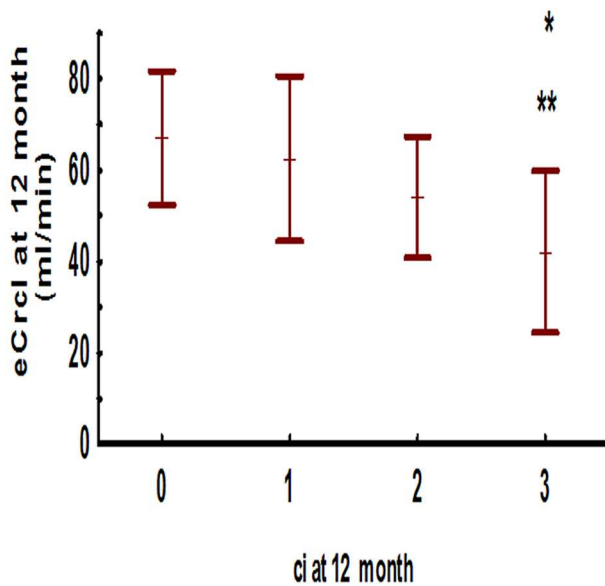

\*  $p < 0.05$ ; score ci 0 vs. score ci 3 (*post hoc* Newman-Keuls test)

\*\*  $p = 0.03$ ; score ci 1 vs. score ci 3

Values are shown as mean  $\pm$  SD

90x121mm (300 x 300 DPI)

1  
2  
3  
4  
5  
6  
7  
8  
9  
10  
11  
12  
13  
14  
15  
16  
17  
18  
19  
20  
21  
22  
23  
24  
25  
26  
27  
28  
29  
30  
31  
32  
33  
34  
35  
36  
37  
38  
39  
40  
41  
42  
43  
44  
45  
46  
47  
48  
49  
50  
51  
52  
53  
54  
55  
56  
57  
58  
59  
60

Figure 3B: Estimated creatinine clearance by ct score

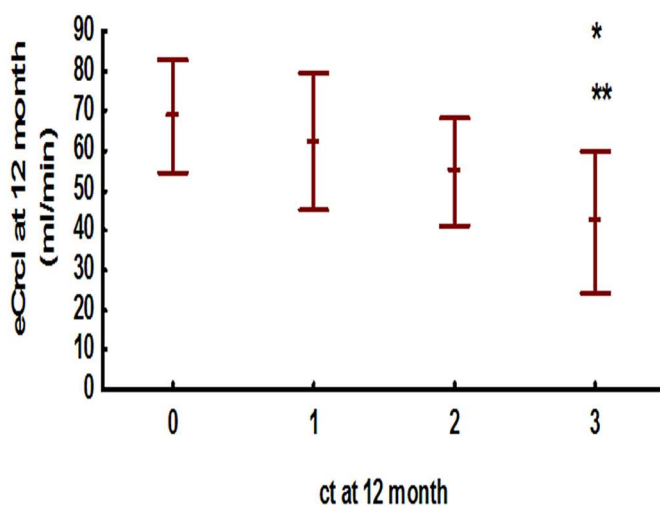

\*  $p < 0.05$ ; score ct 0 vs. score ct 3 (post hoc Newman-Keuls test)

\*\*  $p = 0.03$ ; score ct 1 vs. score ct 3

Values are shown as mean  $\pm$  SD

90x121mm (300 x 300 DPI)

## STROBE Statement—checklist of items that should be included in reports of observational studies

|                           | Item No/page number | Recommendation                                                                                                                                                                                                                                                                                                                                                                                                                                                                                                                                                                                                                                                                                   |
|---------------------------|---------------------|--------------------------------------------------------------------------------------------------------------------------------------------------------------------------------------------------------------------------------------------------------------------------------------------------------------------------------------------------------------------------------------------------------------------------------------------------------------------------------------------------------------------------------------------------------------------------------------------------------------------------------------------------------------------------------------------------|
| <b>Title and abstract</b> | 1/1                 | (a) Indicate the study's design with a commonly used term in the title or the abstract<br>(b) Provide in the abstract an informative and balanced summary of what was done and what was found                                                                                                                                                                                                                                                                                                                                                                                                                                                                                                    |
| <b>Introduction</b>       |                     |                                                                                                                                                                                                                                                                                                                                                                                                                                                                                                                                                                                                                                                                                                  |
| Background/rationale      | 2/5                 | Explain the scientific background and rationale for the investigation being reported                                                                                                                                                                                                                                                                                                                                                                                                                                                                                                                                                                                                             |
| Objectives                | 3/5,6               | State specific objectives, including any prespecified hypotheses                                                                                                                                                                                                                                                                                                                                                                                                                                                                                                                                                                                                                                 |
| <b>Methods</b>            |                     |                                                                                                                                                                                                                                                                                                                                                                                                                                                                                                                                                                                                                                                                                                  |
| Study design              | 4/6                 | Present key elements of study design early in the paper                                                                                                                                                                                                                                                                                                                                                                                                                                                                                                                                                                                                                                          |
| Setting                   | 5/6,7,8,9           | Describe the setting, locations, and relevant dates, including periods of recruitment, exposure, follow-up, and data collection                                                                                                                                                                                                                                                                                                                                                                                                                                                                                                                                                                  |
| Participants              | 6/6                 | (a) <i>Cohort study</i> —Give the eligibility criteria, and the sources and methods of selection of participants. Describe methods of follow-up<br><i>Case-control study</i> —Give the eligibility criteria, and the sources and methods of case ascertainment and control selection. Give the rationale for the choice of cases and controls<br><i>Cross-sectional study</i> —Give the eligibility criteria, and the sources and methods of selection of participants<br>(b) <i>Cohort study</i> —For matched studies, give matching criteria and number of exposed and unexposed<br><i>Case-control study</i> —For matched studies, give matching criteria and the number of controls per case |
| Variables                 | 7/6,7,8             | Clearly define all outcomes, exposures, predictors, potential confounders, and effect modifiers. Give diagnostic criteria, if applicable                                                                                                                                                                                                                                                                                                                                                                                                                                                                                                                                                         |
| Data sources/measurement  | 8*/8                | For each variable of interest, give sources of data and details of methods of assessment (measurement). Describe comparability of assessment methods if there is more than one group                                                                                                                                                                                                                                                                                                                                                                                                                                                                                                             |
| Bias                      | 9                   | Describe any efforts to address potential sources of bias                                                                                                                                                                                                                                                                                                                                                                                                                                                                                                                                                                                                                                        |
| Study size                | 10/6                | Explain how the study size was arrived at                                                                                                                                                                                                                                                                                                                                                                                                                                                                                                                                                                                                                                                        |
| Quantitative variables    | 11/9                | Explain how quantitative variables were handled in the analyses. If applicable, describe which groupings were chosen and why                                                                                                                                                                                                                                                                                                                                                                                                                                                                                                                                                                     |
| Statistical methods       | 12/9                | (a) Describe all statistical methods, including those used to control for confounding<br>(b) Describe any methods used to examine subgroups and interactions<br>(c) Explain how missing data were addressed<br>(d) <i>Cohort study</i> —If applicable, explain how loss to follow-up was addressed<br><i>Case-control study</i> —If applicable, explain how matching of cases and controls was addressed<br><i>Cross-sectional study</i> —If applicable, describe analytical methods taking account of sampling strategy<br>(e) Describe any sensitivity analyses                                                                                                                                |

Continued on next page

**Results**

|                  |                  |                                                                                                                                                                                                                                                                                                                                                                                                               |
|------------------|------------------|---------------------------------------------------------------------------------------------------------------------------------------------------------------------------------------------------------------------------------------------------------------------------------------------------------------------------------------------------------------------------------------------------------------|
| Participants     | 13*<br>/9,<br>10 | (a) Report numbers of individuals at each stage of study—eg numbers potentially eligible, examined for eligibility, confirmed eligible, included in the study, completing follow-up, and analysed<br>(b) Give reasons for non-participation at each stage<br>(c) Consider use of a flow diagram                                                                                                               |
| Descriptive data | 14*<br>/9,<br>10 | (a) Give characteristics of study participants (eg demographic, clinical, social) and information on exposures and potential confounders<br>(b) Indicate number of participants with missing data for each variable of interest<br>(c) <i>Cohort study</i> —Summarise follow-up time (eg, average and total amount)                                                                                           |
| Outcome data     | 15*<br>/11       | <i>Cohort study</i> —Report numbers of outcome events or summary measures over time<br><i>Case-control study</i> —Report numbers in each exposure category, or summary measures of exposure<br><i>Cross-sectional study</i> —Report numbers of outcome events or summary measures                                                                                                                             |
| Main results     | 16/<br>10,<br>11 | (a) Give unadjusted estimates and, if applicable, confounder-adjusted estimates and their precision (eg, 95% confidence interval). Make clear which confounders were adjusted for and why they were included<br>(b) Report category boundaries when continuous variables were categorized<br>(c) If relevant, consider translating estimates of relative risk into absolute risk for a meaningful time period |
| Other analyses   | 17               | Report other analyses done—eg analyses of subgroups and interactions, and sensitivity analyses                                                                                                                                                                                                                                                                                                                |

**Discussion**

|                  |                  |                                                                                                                                                                            |
|------------------|------------------|----------------------------------------------------------------------------------------------------------------------------------------------------------------------------|
| Key results      | 18/<br>12        | Summarise key results with reference to study objectives                                                                                                                   |
| Limitations      | 19/<br>16        | Discuss limitations of the study, taking into account sources of potential bias or imprecision. Discuss both direction and magnitude of any potential bias                 |
| Interpretation   | 20/<br>12-<br>16 | Give a cautious overall interpretation of results considering objectives, limitations, multiplicity of analyses, results from similar studies, and other relevant evidence |
| Generalisability | 21/<br>12-<br>16 | Discuss the generalisability (external validity) of the study results                                                                                                      |

**Other information**

|         |          |                                                                                                                                                               |
|---------|----------|---------------------------------------------------------------------------------------------------------------------------------------------------------------|
| Funding | 22/<br>2 | Give the source of funding and the role of the funders for the present study and, if applicable, for the original study on which the present article is based |
|---------|----------|---------------------------------------------------------------------------------------------------------------------------------------------------------------|

\*Give information separately for cases and controls in case-control studies and, if applicable, for exposed and unexposed groups in cohort and cross-sectional studies.

**Note:** An Explanation and Elaboration article discusses each checklist item and gives methodological background and published examples of transparent reporting. The STROBE checklist is best used in conjunction with this article (freely available on the Web sites of PLoS Medicine at <http://www.plosmedicine.org/>, Annals of Internal Medicine at <http://www.annals.org/>, and Epidemiology at <http://www.epidem.com/>). Information on the STROBE Initiative is available at [www.strobe-statement.org](http://www.strobe-statement.org).
